# Supplementary material for: Comprehensive analysis of histone deacetylases genes in the prognosis and immune infiltration of glioma patients
Source: Aging (Albany NY). 2022 May 11;14(9):4050–68. doi: 10.18632/aging.204071 (PMC9134955; doi:10.18632/aging.204071)
Supplement: Supplementary Table 1 [file aging-14-204071-s001.xlsx]

## Sheet: TCGA
Supplementary Table 1. The used data source of TCGA and CGGA.
id	futime	fustat	HDAC9	HDAC7	HDAC5	HDAC4	HDAC3	HDAC1	riskScore	risk
TCGA-HT-7475	1.45205	0	1.47934	2.29401	4.27783	2.63462	3.62155	3.21476	-0.360057	low
TCGA-E1-A7Z3	6.12329	1	1.22129	2.65006	4.23671	2.60571	3.20312	3.37941	-0.379978	low
TCGA-HT-7684	0.50411	0	0.406708	2.01921	3.9418	2.2677	2.53061	3.75122	-0.740768	low
TCGA-DB-5275	3.99452	0	1.14174	2.41406	4.00006	3.04898	3.48545	3.60258	-0.493731	low
TCGA-RY-A843	0.172603	0	1.10428	1.91207	3.71516	2.63127	3.05969	3.53443	-0.531048	low
TCGA-S9-A7QZ	1.08493	0	1.51148	2.31659	4.60829	3.6205	3.29169	3.01141	-1.39311	low
TCGA-FG-A6IZ	1.25205	0	0.663925	2.04726	4.55528	3.08265	3.57284	2.6742	-1.23551	low
TCGA-DU-A5TY	2.83014	1	2.92876	2.78229	3.65425	1.78161	3.5662	4.23466	1.27153	high
TCGA-FG-A4MY	1.97534	0	1.00748	2.58831	4.65468	2.34029	3.21611	4.23691	-0.355104	low
TCGA-DU-7309	0.230137	0	1.60341	1.62391	4.36276	2.72601	2.97726	3.26252	-1.0849	low
TCGA-IK-8125	3.06849	0	1.43074	2.43855	3.67375	3.21998	3.05648	2.63055	-0.738685	low
TCGA-14-0871	2.41096	1	0.631959	3.45291	3.95125	1.57976	4.38277	5.00097	1.61789	high
TCGA-HT-A61C	1.47123	1	0.99041	3.21432	3.41798	1.6693	4.0702	3.79091	1.44742	high
TCGA-HT-7694	0.575342	0	1.60204	2.05065	4.03422	2.71124	2.81749	2.60196	-0.879274	low
TCGA-TQ-A7RF	1.78082	0	0.802672	2.39068	4.35069	1.94362	3.78038	4.36775	0.249717	high
TCGA-TM-A84G	3.3863	0	2.63822	2.67807	4.81128	3.51442	3.30244	2.87771	-1.03617	low
TCGA-FG-5964	1.03562	0	0.81989	2.52676	4.14794	2.39037	3.29338	3.06316	-0.343167	low
TCGA-DU-A5TP	2.7726	0	0.79416	3.47995	4.10578	2.55287	3.63476	4.10498	0.389322	high
TCGA-12-0619	2.90959	1	1.37282	2.96129	3.16023	2.11059	4.07669	4.84382	1.44825	high
TCGA-DU-8164	1.78356	0	2.30926	1.96811	3.97677	3.44859	3.1616	2.66656	-1.04475	low
TCGA-FG-A70Z	0.89863	0	1.6515	2.77763	3.38611	1.83285	3.23909	3.74009	0.858594	high
TCGA-27-2524	0.632877	1	1.28511	2.68522	2.85339	1.28738	4.05869	4.69431	1.98513	high
TCGA-S9-A7J1	0.682192	0	1.9316	2.59841	3.97252	3.25192	2.91609	2.98762	-0.750108	low
TCGA-06-2558	1.0411	1	2.34365	2.70114	3.4642	1.85859	3.90586	4.48173	1.37673	high
TCGA-32-2615	1.32877	1	2.16066	3.63765	3.47373	1.70371	4.04258	4.55491	1.97458	high
TCGA-QH-A65R	1.26301	0	1.04316	1.82338	4.45724	3.27924	3.31214	2.30212	-1.53687	low
TCGA-CS-6666	0.706849	0	1.996	2.86539	4.42097	2.09488	3.26404	4.06573	0.283916	high
TCGA-HT-7478	0.531507	0	1.08895	1.8892	3.76958	2.46768	3.41991	3.82487	-0.233646	high
TCGA-HT-7609	3.83288	0	0.844746	2.48296	4.33449	2.67738	3.23735	4.03304	-0.512043	low
TCGA-TQ-A7RK	3.67397	0	0.760975	2.23131	4.63846	2.96889	3.38512	4.36217	-0.88771	low
TCGA-DB-5278	4.18082	0	1.80591	2.29701	4.14988	3.26605	3.01159	2.67604	-1.04215	low
TCGA-HT-A74H	0.20274	0	1.05014	2.60366	3.77807	1.56887	3.39818	4.02918	0.730543	high
TCGA-26-5139	0.131507	0	1.71521	3.44817	3.06575	1.57905	3.76457	4.4481	1.94225	high
TCGA-WY-A85A	3.61644	0	1.1859	2.44109	4.27804	2.85552	3.27161	3.63444	-0.60057	low
TCGA-HT-A5R7	1.68493	0	0.918835	2.07981	4.08029	2.73157	3.05127	3.30171	-0.809429	low
TCGA-HT-A619	1.60822	0	2.93064	2.28973	4.27891	3.75802	3.41306	3.10078	-0.928672	low
TCGA-06-0221	1.65205	1	1.91924	2.82918	4.40956	2.63367	3.47561	3.87336	-0.0334985	high
TCGA-DH-5140	1.66301	1	1.28444	2.63662	4.11836	2.81345	3.29709	4.06999	-0.274348	low
TCGA-HT-7858	4.21918	0	1.26942	1.62774	4.5388	2.66448	3.21415	3.98528	-0.965204	low
TCGA-VV-A86M	1.33425	0	1.15669	2.07681	4.25071	2.99623	3.6605	4.39208	-0.532533	low
TCGA-TQ-A8XE	2.6137	1	1.60214	2.65307	3.77474	2.93309	3.54746	3.86176	0.00527677	high
TCGA-CS-6667	0.630137	0	0.709473	2.5057	4.48471	2.72857	3.33717	3.97148	-0.610522	low
TCGA-VV-A829	3.08767	0	1.86726	2.17273	4.58279	3.43617	3.11542	2.3234	-1.46016	low
TCGA-06-0238	1.10959	1	2.55636	1.93957	3.37369	1.2678	4.22107	4.36941	1.63694	high
TCGA-06-0184	3.36438	0	1.52023	2.37024	3.05398	1.96443	4.11846	4.41937	1.29492	high
TCGA-06-0178	4.49863	0	0.963373	1.68592	2.78972	1.83512	4.08175	4.39716	1.05508	high
TCGA-CS-6290	1.49589	0	1.19525	2.3302	4.13391	2.27575	3.21699	3.83931	-0.172691	high
TCGA-06-2570	0.780822	0	2.11145	2.91661	4.32595	2.17753	4.14118	4.52385	0.854912	high
TCGA-HT-8105	0.520548	0	1.72702	2.14629	4.36075	2.99666	3.29866	2.60177	-0.940622	low
TCGA-DH-A7UT	1.11507	0	0.587222	2.64918	4.22256	2.59687	3.54048	3.92233	-0.236511	high
TCGA-HW-A5KL	1.73425	0	0.799313	2.35716	4.00403	3.30116	3.10444	3.6736	-0.9455	low
TCGA-DU-A7T6	1.49863	1	1.33994	2.66816	4.556	2.27806	3.14727	3.16262	-0.37364	low
TCGA-26-1442	2.61096	0	1.10308	2.64262	3.9122	2.09196	3.42397	3.87562	0.319405	high
TCGA-S9-A7R4	2.50411	0	1.01655	2.76204	3.93703	2.84214	3.0985	3.71278	-0.351064	low
TCGA-S9-A6WO	1.55068	0	0.786861	2.3123	4.28311	3.03244	3.27469	3.8467	-0.831498	low
TCGA-HT-8011	1.35342	0	1.59078	2.68718	3.31676	2.16973	3.83076	4.47667	1.04376	high
TCGA-E1-A7YH	7.76712	1	1.0269	2.21568	4.62265	3.23926	3.49765	4.14097	-0.993499	low
TCGA-HT-8108	0.208219	0	1.82184	2.31268	3.78151	3.58168	3.36699	3.46544	-0.714084	low
TCGA-CS-4941	0.641096	1	2.09993	2.36868	3.89152	1.70893	3.57108	4.54301	0.862826	high
TCGA-HT-8558	1.14521	0	1.96169	1.7987	4.18751	2.16645	3.01131	2.58798	-0.551182	low
TCGA-DH-A7UV	1.55068	0	0.688228	2.66281	4.30249	3.14914	3.52968	4.14673	-0.589203	low
TCGA-E1-5318	6.51781	1	2.69525	2.30653	4.55242	3.34037	3.26862	2.83587	-0.966094	low
TCGA-02-2483	1.27671	0	1.51263	2.37943	3.74273	1.70239	3.63243	4.39857	0.835138	high
TCGA-TQ-A7RN	2.81096	0	1.04827	2.23552	3.91083	3.80764	3.17275	2.91626	-1.33942	low
TCGA-DB-5270	10.2274	0	1.64874	2.07945	4.32796	2.2536	2.94291	3.05452	-0.570627	low
TCGA-12-3652	2.90959	1	1.28401	1.89498	3.05194	1.3998	4.03509	4.34064	1.33608	high
TCGA-E1-A7YM	1.77534	1	0.697858	2.80262	4.03021	2.50268	3.37714	4.13319	-0.00981162	high
TCGA-06-0158	0.90137	1	1.21809	3.40273	3.74756	1.72275	3.76355	4.24628	1.29317	high
TCGA-HT-7470	0.734247	0	1.05944	2.00626	4.28562	2.80567	2.91863	3.41666	-1.0272	low
TCGA-KT-A7W1	1.2	0	1.991	3.0409	2.89477	2.05844	3.77693	4.49777	1.59339	high
TCGA-HT-7884	0.939726	0	1.44981	2.39175	4.1073	3.81533	3.30465	3.85957	-1.058	low
TCGA-15-0742	1.14795	1	1.31742	3.10299	3.19559	1.4388	4.28586	4.26332	1.93729	high
TCGA-DU-A5TR	2.48767	0	0.844222	3.21461	4.33366	1.45657	3.63816	3.97429	0.855297	high
TCGA-HW-8322	1.48493	0	1.64442	2.50554	3.86763	3.36677	3.45779	2.61071	-0.670282	low
TCGA-14-2554	1.45753	1	1.36079	2.85711	2.67331	1.10762	4.27756	4.36496	2.35905	high
TCGA-FG-A87N	1.13151	0	1.65037	2.87494	3.91439	2.27183	3.7228	4.33625	0.661471	high
TCGA-HT-7855	1.60274	0	1.86099	1.56823	4.70392	2.43874	3.2539	3.88554	-0.806716	low
TCGA-S9-A6TS	5.18082	1	0.557721	1.98246	4.17192	2.8117	3.38145	4.26412	-0.702361	low
TCGA-28-5208	1.29863	0	1.56334	2.61275	3.31278	1.2838	4.01911	4.73829	1.73967	high
TCGA-WY-A85E	1.73425	0	1.32482	2.23564	3.92295	2.54169	3.23959	4.02033	-0.205941	high
TCGA-DH-A66G	1.43288	0	1.79237	2.45982	3.90291	2.63418	3.03935	3.75821	-0.193929	high
TCGA-WH-A86K	1.10959	0	0.524524	2.43769	4.0773	2.19344	2.78668	4.03909	-0.357974	low
TCGA-S9-A7QW	1.25479	0	1.67796	2.44243	4.2696	2.90823	3.53545	3.55004	-0.406934	low
TCGA-28-5213	0.816438	0	0.824443	2.58401	2.40073	1.05396	4.16857	4.31892	2.23769	high
TCGA-DU-8167	1.29041	0	1.37287	2.38947	4.4273	2.38233	3.37284	3.78937	-0.273994	low
TCGA-FN-7833	2.29315	0	0.800126	2.56738	4.16444	2.76505	3.44663	4.35153	-0.280709	low
TCGA-FG-8189	1.87671	0	1.87524	1.86539	4.2076	2.65468	3.11156	2.16371	-0.901847	low
TCGA-TQ-A7RV	5.11781	0	0.933363	2.18551	3.88765	2.24166	2.85206	3.82401	-0.323333	low
TCGA-DU-6542	0.2	0	1.86456	2.44199	4.44569	2.81116	3.33572	3.66222	-0.481891	low
TCGA-FG-A60J	1.23014	0	0.856734	2.40743	3.84278	2.92461	2.92043	3.74627	-0.643926	low
TCGA-S9-A6U8	8.1863	1	1.20488	2.20484	4.16975	2.94364	3.10231	3.7854	-0.767504	low
TCGA-DU-6399	5.47945	1	1.22817	2.0879	3.98676	3.34764	3.30821	3.45132	-0.943224	low
TCGA-DB-A4XF	2.79726	0	0.904744	2.00878	3.89431	3.04212	3.13758	3.67449	-0.839934	low
TCGA-TM-A84L	3.40274	1	0.949534	2.877	4.07279	2.15284	3.33356	4.00712	0.246878	high
TCGA-76-4929	0.30411	1	1.53335	2.6321	3.29572	2.39725	4.02619	4.49632	0.965471	high
TCGA-DU-7299	3.66849	1	1.23796	1.95874	4.3345	2.77012	2.9471	3.79343	-0.933994	low
TCGA-DU-7015	7.56438	0	2.27492	1.94517	4.01319	3.01125	3.0378	3.4014	-0.721195	low
TCGA-HT-8013	5.29589	1	1.13374	2.75618	4.31173	2.5346	3.4052	4.11798	-0.108153	high
TCGA-HT-7468	0.556164	0	3.02152	2.33522	3.61852	3.44963	3.26113	3.10016	-0.381914	low
TCGA-06-2565	0.567123	0	1.29403	3.24487	3.31336	1.86121	3.96349	4.77426	1.58081	high
TCGA-E1-5303	5.62192	1	0.986137	2.01695	3.85006	2.32015	3.12489	3.88524	-0.277525	low
TCGA-S9-A7R2	0.865753	1	1.73265	2.47319	4.03147	1.82507	3.24271	4.02068	0.418855	high
TCGA-HT-8113	2.46575	0	1.68233	1.97857	4.18188	2.62406	3.05721	2.51337	-0.8178	low
TCGA-S9-A6U5	2.71781	0	1.71309	2.49968	4.41045	3.54663	2.82356	2.84745	-1.36306	low
TCGA-EZ-7264	1.19452	0	1.35652	2.12655	4.35886	4.11775	3.29101	2.57358	-1.79018	low
TCGA-CS-4943	1.51233	0	0.840727	2.0671	4.55403	2.80606	3.32528	3.6691	-0.94766	low
TCGA-P5-A735	0.8	0	0.601958	2.54527	4.46843	3.1194	3.48411	3.77928	-0.827989	low
TCGA-S9-A6WQ	1.1726	0	0.998592	1.75896	4.60981	2.4448	3.17623	3.61211	-0.938305	low
TCGA-FG-6691	0.282192	0	1.53375	2.09346	3.29931	3.21123	3.10513	3.8246	-0.428453	low
TCGA-DU-7018	2.55616	1	3.08623	2.34009	4.15579	3.53515	2.96754	2.54436	-0.974628	low
TCGA-VM-A8C8	3.5863	0	1.0945	2.18864	3.97763	3.03612	3.36228	4.2682	-0.535278	low
TCGA-HT-7882	0.309589	1	1.26366	3.84756	3.37276	2.1786	3.51386	4.3223	1.31493	high
TCGA-HT-A4DV	2.16986	0	0.975191	2.5644	4.40999	3.02976	3.16238	3.20791	-0.908796	low
TCGA-P5-A5F1	0.490411	0	0.418164	2.51119	4.22401	2.25108	3.21491	4.25465	-0.213183	high
TCGA-06-0211	0.986301	1	1.72269	3.09644	3.30343	1.53809	3.93898	4.35287	1.73549	high
TCGA-06-0139	0.991781	1	0.980013	3.03742	2.74811	1.21359	3.88235	4.33182	2.04693	high
TCGA-CS-5396	0.830137	0	3.26905	1.8665	4.53473	3.30249	2.70999	2.86042	-1.29787	low
TCGA-DB-A75M	1.49041	0	0.400479	2.35259	4.39546	3.00689	3.23702	3.98071	-0.936675	low
TCGA-19-1787	1.05479	1	1.1335	2.68263	3.96668	1.78439	4.27974	4.43374	1.0508	high
TCGA-P5-A781	0.367123	0	1.1624	2.2795	3.76992	3.34952	2.90954	3.06897	-1.01095	low
TCGA-S9-A7IY	1.9589	0	1.16038	2.66736	3.82883	3.37718	2.96976	2.94573	-0.865889	low
TCGA-CS-5397	0.531507	1	1.74145	2.65283	3.4611	1.57737	3.35015	3.80615	1.0136	high
TCGA-QH-A6X8	1.39452	0	1.33293	2.8349	4.19543	2.95966	3.28902	2.73459	-0.552073	low
TCGA-DB-A4X9	3.86849	0	1.55304	2.27756	4.00362	3.03978	3.0484	4.05433	-0.606165	low
TCGA-S9-A6U0	1.91233	0	1.3245	3.53243	3.37283	1.8284	3.64146	4.22771	1.45636	high
TCGA-27-1831	1.38356	1	1.82015	1.74373	1.82417	1.4095	3.84322	4.18394	1.94316	high
TCGA-RY-A83Y	0.454795	0	0.869494	1.9708	4.32729	3.52013	3.55929	2.85131	-1.36784	low
TCGA-P5-A730	0.912329	0	1.66241	2.47854	4.60995	2.99935	3.23625	3.35503	-0.832027	low
TCGA-HW-7489	0.693151	0	1.36595	1.96221	4.50734	2.70281	2.98825	3.24795	-1.03454	low
TCGA-HT-7692	0.246575	0	2.08379	2.40268	3.48582	3.36862	2.99916	3.10732	-0.551953	low
TCGA-HT-7686	3.56164	0	1.17117	2.06625	4.06663	2.38785	3.50594	4.15066	-0.142854	high
TCGA-CS-4938	0.391781	0	0.480703	1.96524	3.77262	2.28781	3.12702	3.49577	-0.414809	low
TCGA-S9-A6WP	1.26301	0	1.45533	2.58817	4.36143	3.44428	3.29107	2.91533	-1.03198	low
TCGA-32-4213	0.978082	0	1.27485	2.54564	3.02757	1.39636	3.89415	3.75768	1.49257	high
TCGA-DB-A4XD	3.31507	0	1.04988	2.2944	4.06945	3.6187	3.14739	3.78587	-1.13056	low
TCGA-S9-A7QX	1.09315	0	0.702216	1.9281	4.2632	3.04999	3.42697	3.97695	-0.937908	low
TCGA-TM-A7CF	4.62466	0	0.980747	2.22588	4.41162	2.98332	3.07505	3.59655	-1.01685	low
TCGA-FG-5962	2.15616	0	1.57865	2.05982	3.91074	2.83788	2.77684	2.62303	-0.911447	low
TCGA-06-0168	1.63836	1	0.793577	3.02448	3.58963	1.56975	3.76555	3.70522	1.11339	high
TCGA-S9-A7IQ	3.01096	0	1.67747	1.88802	4.48261	2.7047	3.07322	2.28903	-1.11979	low
TCGA-QH-A870	1.08219	0	1.47801	2.39798	4.00535	2.20504	3.3203	4.16077	0.151161	high
TCGA-12-1597	1.84932	1	1.88924	2.049	3.66179	1.81156	4.55433	3.86985	1.09624	high
TCGA-S9-A7J3	1.41918	0	1.87975	2.69907	4.21686	3.60208	2.87129	2.77707	-1.14586	low
TCGA-DB-A4XC	3.89315	0	1.11361	2.39821	3.92647	3.78377	3.24749	4.00696	-1.00596	low
TCGA-06-0187	2.26849	1	1.63764	3.20321	3.27523	1.86801	3.95765	4.53367	1.60563	high
TCGA-DU-8162	1.21644	1	1.6008	1.98499	3.86304	2.32746	2.95461	2.99544	-0.417681	low
TCGA-DU-A76L	2.23014	1	1.43001	2.96378	3.61132	1.84116	3.73141	4.2329	1.10394	high
TCGA-S9-A6TV	1.56438	0	0.263822	2.91484	3.97136	2.37227	3.95188	4.45594	0.418731	high
TCGA-HT-A5RA	2.27945	0	1.27745	3.17692	3.13804	1.85007	3.97792	4.19745	1.55495	high
TCGA-DU-A7TG	3.70137	1	1.65346	2.15652	4.35139	2.63281	3.02433	2.85637	-0.794288	low
TCGA-S9-A6WI	7.08219	0	1.44919	1.90386	4.45115	2.29933	3.03442	2.52646	-0.848455	low
TCGA-QH-A6X5	1.36164	0	0.918646	2.26085	3.89242	3.11283	2.74746	3.08066	-1.0626	low
TCGA-HT-7482	5.00274	0	1.16179	2.10582	3.80036	2.38712	2.81313	4.0284	-0.344023	low
TCGA-DU-A7TA	7.0274	0	2.10159	3.07953	4.20178	3.24577	3.69564	3.71517	-0.082655	high
TCGA-76-4932	3.99452	1	2.1007	3.01495	3.63748	1.46	4.08532	5.62816	1.94206	high
TCGA-DH-A7US	1.09315	0	0.863101	2.59549	4.22182	4.35121	3.19258	3.13127	-1.69629	low
TCGA-27-2526	0.238356	1	1.60881	1.79764	2.94874	0.906747	3.88863	3.84276	1.58525	high
TCGA-S9-A7R7	8.21918	0	0.89101	2.83909	3.9104	2.10468	3.6084	4.09362	0.493714	high
TCGA-06-0749	0.224658	1	1.00574	2.81256	3.58888	1.49093	3.85404	4.10663	1.22537	high
TCGA-DU-8166	1.4137	0	2.40449	2.43219	4.28891	3.09208	3.24107	3.88693	-0.477126	low
TCGA-32-1980	0.0986301	1	1.10514	2.77685	3.7368	1.65489	3.63612	3.91362	0.891449	high
TCGA-DU-7010	1.24932	1	1.10815	2.32984	3.4453	2.72164	3.37076	4.38594	0.0747615	high
TCGA-HW-7493	2.99178	0	1.5743	1.8346	3.55612	2.32608	2.84032	3.36987	-0.3122	low
TCGA-QH-A6X4	1.21096	0	0.917589	2.67391	4.44183	3.55824	3.56051	2.9455	-1.0874	low
TCGA-06-0157	0.265753	1	2.06921	2.83608	3.06959	1.2565	3.93701	4.28585	1.99172	high
TCGA-E1-A7YS	1.27671	1	0.668686	1.6277	4.4947	4.40643	3.56886	2.65793	-2.29799	low
TCGA-FG-A4MX	1.5589	0	0.434207	2.61448	3.91946	2.23632	3.05668	4.36751	-0.036008	high
TCGA-32-2616	0.613699	1	1.98641	2.63438	3.90004	1.5171	4.01298	4.16453	1.24612	high
TCGA-DH-5142	2.52603	0	1.18838	2.65794	4.09464	2.22899	3.44299	4.07716	0.195517	high
TCGA-RY-A83Z	0.824658	0	1.24293	2.19976	4.74391	1.98788	3.82445	4.40345	0.0273567	high
TCGA-DU-7301	2.1589	1	1.56788	1.65506	4.00117	2.29419	3.44516	3.41508	-0.320214	low
TCGA-28-5207	0.939726	1	1.80121	2.95519	3.6162	1.83621	4.16135	4.2976	1.40793	high
TCGA-VM-A8CA	1.12603	0	0.89521	2.30736	4.18579	2.21017	3.20601	3.16126	-0.360867	low
TCGA-19-2620	0.405479	1	1.23233	3.08796	3.18196	1.78329	3.61351	3.916	1.28824	high
TCGA-TM-A84I	2.33973	0	1.56372	1.57199	4.59573	2.61808	3.65298	5.19815	-0.492482	low
TCGA-DU-6410	0.663014	0	2.52341	2.06767	4.36269	3.85678	3.08008	2.2228	-1.5631	low
TCGA-DU-A76R	1.77534	1	1.06924	2.30184	3.92054	2.95981	3.27424	3.18117	-0.640763	low
TCGA-DU-5853	1.11507	0	1.41882	2.22597	4.09719	3.36666	3.00716	3.69155	-1.01834	low
TCGA-HW-8320	0.745205	0	1.04246	2.58674	4.52416	3.36442	3.43892	3.868	-0.91557	low
TCGA-06-5859	0.380822	0	1.75141	2.25743	3.43192	2.27929	4.60667	4.21597	1.07301	high
TCGA-HT-7476	0.545205	0	0.972623	1.90545	3.51773	2.3848	3.273	3.17336	-0.242824	high
TCGA-S9-A6UA	0.487671	1	1.28552	3.304	3.54972	1.62642	3.54368	3.8496	1.25488	high
TCGA-HT-8564	1.30959	0	1.29493	3.07451	3.58813	2.73368	3.67167	4.13538	0.49568	high
TCGA-06-0743	1.86027	0	1.10866	3.7175	3.60044	1.40792	4.02179	4.60021	1.91094	high
TCGA-CS-6668	0.668493	0	2.48156	2.39387	4.40331	3.53899	3.24212	2.40022	-1.10958	low
TCGA-HT-7601	0.419178	0	1.01814	2.49882	3.77436	1.83848	3.08514	3.61818	0.262839	high
TCGA-E1-A7YK	1.03562	1	0.873773	2.73658	4.29746	2.08337	3.07316	4.24728	-0.00660086	high
TCGA-TM-A84J	2.0137	0	2.36356	2.3863	4.11013	2.97872	3.91605	3.99278	0.0271335	high
TCGA-12-3650	0.912329	1	2.03822	2.34957	3.51787	1.60454	4.20418	4.00346	1.34357	high
TCGA-FG-A60L	1.36712	0	0.572765	2.96511	4.50517	1.91004	3.68405	3.72861	0.25256	high
TCGA-HT-A61B	1.46027	0	0.828597	3.19713	4.37777	1.9262	4.13961	4.23698	0.802237	high
TCGA-28-1747	0.210959	1	1.48004	2.7552	3.3304	1.58945	3.83162	4.07352	1.36294	high
TCGA-14-1034	1.32877	1	1.67062	2.23099	3.94522	1.25099	4.16085	4.84436	1.33009	high
TCGA-12-5299	0.268493	1	2.29347	2.61366	2.97139	1.49248	4.14726	4.2808	1.93362	high
TCGA-32-1970	1.28219	1	1.6391	2.78262	3.58076	2.05262	3.81949	4.51238	1.03036	high
TCGA-28-2509	0.39726	0	1.56626	2.86279	3.33976	1.35836	4.666	4.72875	2.12026	high
TCGA-FG-A6J1	1.36986	0	1.19141	2.69293	4.67467	2.93298	3.69509	3.15261	-0.626886	low
TCGA-QH-A6CV	1.21096	0	1.82046	2.98803	3.71196	1.33734	4.50835	4.45464	1.91097	high
TCGA-HT-8019	2.75068	0	1.74218	1.97855	4.60535	2.15688	2.96195	2.4308	-0.794208	low
TCGA-HT-7610	4.67397	0	1.55746	1.79395	4.02784	3.29096	3.09747	3.05942	-1.17695	low
TCGA-TM-A84Q	2.11507	0	1.15133	2.59062	4.36424	2.40362	3.56438	3.65633	-0.129722	high
TCGA-TQ-A7RH	1.33151	0	1.5056	2.86944	4.205	2.54552	3.69281	3.96573	0.197737	high
TCGA-QH-A65X	1.32055	0	1.52633	2.6808	4.34195	3.08941	3.67378	2.89262	-0.534115	low
TCGA-HT-A74K	1.27945	0	0.953837	2.73797	4.49829	2.4703	3.61138	3.17069	-0.284502	low
TCGA-DU-6393	4.34247	1	1.27567	1.7931	4.32972	4.38882	3.3128	2.76257	-2.09091	low
TCGA-06-2557	0.090411	1	1.98953	2.94656	3.83825	1.88237	4.16485	4.82322	1.38331	high
TCGA-E1-A7YD	1.19178	1	2.02771	2.05397	3.47034	2.11491	3.75529	4.7361	0.787222	high
TCGA-DU-A7T8	11.5863	1	1.21425	2.4288	4.09657	3.47728	3.62972	3.82172	-0.701289	low
TCGA-DU-A5TU	2.18082	0	0.436617	2.35223	4.46753	2.38941	4.01211	4.58422	-0.0581823	high
TCGA-TM-A7C3	4.12055	0	1.40725	2.97254	3.53817	1.56753	4.19243	4.9497	1.68832	high
TCGA-DU-A5TW	2.08219	0	1.61036	2.11841	4.16938	2.59422	3.42184	4.43984	-0.209884	high
TCGA-DB-5277	4.23836	1	1.64972	2.09128	4.49312	2.71533	3.27255	4.36238	-0.568347	low
TCGA-HT-7856	3.25753	0	1.41695	2.39264	4.38077	2.94478	2.86781	2.76691	-1.0507	low
TCGA-FG-A4MW	1.53151	1	1.47177	2.88195	3.7767	2.11128	3.38179	4.19902	0.616287	high
TCGA-FG-A4MU	0.893151	0	1.14248	3.65427	3.64533	1.94518	3.64717	4.41702	1.28044	high
TCGA-HT-7477	2.02192	0	0.897076	2.84121	4.48438	2.2234	3.33389	4.46422	0.0193677	high
TCGA-06-5411	0.69589	1	1.49863	2.33081	3.50101	1.53331	3.97397	3.69433	1.10441	high
TCGA-VM-A8CE	2.99452	0	1.32531	2.84168	4.35486	4.22062	3.08753	3.0412	-1.53319	low
TCGA-06-5408	0.978082	1	1.45877	3.26969	3.40349	1.87295	4.36748	4.58124	1.73786	high
TCGA-08-0386	1.50137	1	1.47062	2.43291	3.50512	2.3439	4.16999	4.47893	0.840924	high
TCGA-HT-7677	1.35342	0	1.84053	2.50776	4.12415	4.19825	3.09548	2.77833	-1.48226	low
TCGA-TM-A84R	1.55068	0	1.7009	2.03999	4.21296	2.5623	3.02514	2.55302	-0.76902	low
TCGA-S9-A7IZ	0.594521	0	1.37928	2.34018	4.07981	2.25826	3.27055	3.96137	-0.0369647	high
TCGA-06-0152	1.0274	1	1.73646	3.32751	3.43147	1.64334	3.76404	4.64335	1.67212	high
TCGA-S9-A89V	1.5589	0	1.65949	2.8974	4.39744	2.57513	3.33121	3.55988	-0.138739	high
TCGA-DU-8158	0.424658	1	1.42451	2.4894	3.38695	2.00697	3.64254	3.79775	0.764694	high
TCGA-14-1825	0.635616	1	1.27903	2.33135	3.16256	1.86399	4.06512	4.19118	1.1621	high
TCGA-06-2564	0.49589	0	2.56703	3.2778	3.23904	2.13195	3.84544	4.38071	1.60213	high
TCGA-DU-7014	9.78356	1	1.38772	2.61512	4.51212	2.72041	3.16445	3.75227	-0.546939	low
TCGA-06-0156	0.487671	1	1.72924	3.16425	3.52775	2.077	4.24597	4.56458	1.47335	high
TCGA-DU-6401	7.28767	1	0.631699	1.97035	4.50778	2.40139	2.85867	3.81908	-0.949772	low
TCGA-FG-A711	3.6411	0	0.703773	2.39004	3.83276	2.86742	3.31769	3.63909	-0.460954	low
TCGA-QH-A6XA	1.37534	0	0.922133	2.2085	3.86414	2.88049	3.10104	3.67543	-0.631357	low
TCGA-S9-A6WL	2.59178	0	1.70629	2.27193	4.05212	3.28296	3.07312	2.71217	-0.994409	low
TCGA-19-2625	0.339726	1	0.884733	3.38172	3.65707	1.25226	3.976	5.047	1.8281	high
TCGA-E1-A7YN	1.99178	1	0.490325	3.31257	3.50033	2.06314	3.23738	3.85807	0.670187	high
TCGA-TQ-A7RM	3.05753	0	1.85143	2.41064	4.20512	2.2947	2.85746	4.28955	-0.145027	high
TCGA-DB-A64V	2.43562	0	0.798503	2.39618	4.15837	2.61214	3.06232	3.23777	-0.651029	low
TCGA-S9-A6U6	1.33973	0	0.77656	2.15494	3.94917	3.2692	3.46349	3.56046	-0.836408	low
TCGA-FG-8191	1.29315	0	0.964206	2.03547	3.96313	3.26593	3.01401	3.96173	-1.01393	low
TCGA-HT-7854	0.8	0	1.03394	2.47096	3.91189	2.11144	2.8764	3.38437	-0.155203	high
TCGA-FG-A6J3	1.85479	0	0.912991	2.65143	4.23726	1.26097	3.01186	4.08191	0.485839	high
TCGA-DU-5849	1.2137	0	1.18334	2.05139	4.25628	3.22927	3.25518	2.85047	-1.17833	low
TCGA-P5-A736	0.630137	0	0.633363	2.49348	4.1841	1.84683	2.91374	3.84216	-0.1067	high
TCGA-06-0174	0.268493	1	2.34733	2.46927	3.36278	1.77524	3.98037	3.83754	1.29991	high
TCGA-WY-A858	3.66301	0	0.690474	2.95604	3.83135	2.1733	3.0882	3.72773	0.179474	high
TCGA-DU-7009	11.5233	0	1.70694	1.9534	3.88126	3.82661	2.77101	2.84194	-1.54612	low
TCGA-R8-A6MK	7.40274	0	1.16247	2.32389	3.6561	2.58613	2.90416	2.78221	-0.466572	low
TCGA-FG-8181	1.07945	0	1.80927	1.79722	3.92479	1.78869	3.13936	2.51802	-0.130531	high
TCGA-QH-A65Z	1.16986	0	1.52396	2.49494	4.14792	3.03139	3.23549	2.82192	-0.709217	low
TCGA-E1-A7YV	2.70411	1	1.28358	2.70994	4.31259	3.03956	3.93265	3.85835	-0.219194	high
TCGA-S9-A6U2	1.96986	0	1.1175	2.3374	3.92724	3.4662	3.03978	2.90963	-1.12297	low
TCGA-CS-5395	1.75068	1	1.64082	2.19596	3.14902	2.52152	3.26534	3.72294	0.254933	high
TCGA-S9-A7R8	2.63288	1	1.4662	2.78419	4.50662	3.428	3.24542	3.85997	-0.859194	low
TCGA-06-5413	0.734247	0	2.20174	2.67121	2.74199	1.39547	4.33657	4.59363	2.28821	high
TCGA-FG-6689	0.520548	0	1.00997	2.04221	4.29875	2.46974	3.03857	3.50708	-0.725931	low
TCGA-28-2514	0.438356	0	1.49452	3.05751	3.56509	1.99917	3.80835	3.94606	1.07109	high
TCGA-HT-8104	1.01918	0	1.22492	2.73764	3.27537	2.28015	3.73677	4.11286	0.82652	high
TCGA-DB-5280	3.04658	0	0.645278	2.21676	3.94794	3.61175	3.28233	3.97281	-1.08088	low
TCGA-HT-7480	6.26575	0	1.76747	2.13473	4.17603	3.90821	3.10004	3.03777	-1.46613	low
TCGA-QH-A86X	0.923288	0	1.946	2.69027	3.98788	3.60664	3.20581	2.85111	-0.827779	low
TCGA-06-2562	0.235616	0	1.8962	3.47821	3.1098	1.33363	4.21836	3.95905	2.27605	high
TCGA-HT-7874	3.09589	0	1.58687	1.90009	4.03976	2.85032	2.81018	2.57463	-1.06104	low
TCGA-DU-7012	0.545205	1	2.27243	2.44351	3.32066	1.80161	3.47099	3.93237	1.03846	high
TCGA-32-1982	0.389041	1	0.975469	3.37497	3.23541	1.55403	3.9232	4.43271	1.74451	high
TCGA-06-0649	0.175342	1	2.00064	2.57574	3.60816	1.52058	4.59196	4.67495	1.76599	high
TCGA-TM-A84O	2.76986	1	2.34229	2.72396	4.39244	2.2948	2.91754	3.86809	-0.0378407	high
TCGA-FG-A713	1.70411	0	1.37508	2.12527	4.51616	3.02307	2.95742	2.64272	-1.29673	low
TCGA-DU-6403	0.969863	1	1.29686	2.65145	3.9568	2.49123	3.4468	3.74209	0.0598853	high
TCGA-28-5204	1.24384	1	2.02968	2.85307	3.37598	1.48178	4.30623	4.82401	1.94842	high
TCGA-19-4065	0.586301	0	1.25525	2.97408	3.41356	1.66103	3.70115	4.43174	1.32467	high
TCGA-S9-A7IX	1.86027	0	1.90352	2.97443	3.73372	1.86399	3.65884	3.99653	1.04776	high
TCGA-19-1389	0.386301	1	1.47036	2.96356	2.68066	1.08095	3.44675	4.63083	2.07858	high
TCGA-S9-A6WE	6.04932	0	2.18795	2.25407	4.47	2.93587	2.87314	2.78059	-0.991542	low
TCGA-R8-A73M	4.94795	0	1.3391	2.57382	4.49869	2.88641	3.74766	2.72208	-0.572794	low
TCGA-HT-7485	0.334247	0	0.92815	1.79695	3.89737	2.49179	2.95222	3.67998	-0.662877	low
TCGA-DB-A4XB	2.51781	0	1.35975	2.86715	4.38696	3.65894	3.39371	3.97528	-0.833629	low
TCGA-HT-7688	2.6411	0	2.01921	1.92597	4.33083	2.81343	3.18449	2.73691	-0.878369	low
TCGA-HW-7491	3.34795	0	1.95206	2.27847	3.67647	3.44295	2.94158	2.10488	-1.00736	low
TCGA-DU-5871	1.57808	0	1.01057	2.15045	4.47049	2.83358	3.15375	3.93802	-0.879477	low
TCGA-DU-A76O	1.43014	0	0.994577	2.57302	4.14431	2.91242	3.35988	3.77902	-0.469557	low
TCGA-HT-7620	1.18904	0	1.15674	2.44275	3.78135	2.96282	2.68983	3.37578	-0.734973	low
TCGA-RY-A83X	2.5726	0	1.02271	2.63051	4.03248	3.73632	3.44941	3.22444	-0.979138	low
TCGA-06-0190	0.868493	1	1.04671	3.32775	3.17199	1.86529	3.76067	4.60522	1.51318	high
TCGA-06-2567	0.364384	1	0.70768	3.03174	3.61169	1.93001	4.2283	4.19503	1.16435	high
TCGA-DB-A4XH	2.63562	0	1.01469	2.02547	4.17299	2.89067	2.58265	3.17309	-1.23304	low
TCGA-KT-A74X	1.2	0	1.96054	2.79433	4.00424	2.9025	3.0698	2.76957	-0.393617	low
TCGA-DH-5144	0.668493	0	1.54203	2.01416	4.30513	3.56098	3.07253	2.51845	-1.52061	low
TCGA-16-1045	2.41918	1	1.06848	3.24507	3.07047	1.96073	4.09819	4.41868	1.60723	high
TCGA-FG-5965	2.68219	0	1.04009	2.4537	3.92379	3.07697	3.22741	3.54113	-0.612478	low
TCGA-14-0736	1.26027	1	1.12146	1.74408	2.77617	1.07622	3.95045	3.98671	1.49498	high
TCGA-CS-6670	0.550685	0	1.38343	2.1439	4.27046	3.41872	2.96167	2.71449	-1.39698	low
TCGA-QH-A6CS	1.61096	0	1.05569	2.54804	3.3611	1.33199	3.46825	3.77448	1.08958	high
TCGA-S9-A7QY	2.36438	0	0.882724	2.43841	3.99444	3.23372	3.12297	3.13081	-0.925039	low
TCGA-DU-8165	1.59452	0	2.33499	2.83927	3.35357	2.34227	4.20592	5.16333	1.45325	high
TCGA-12-0821	0.884932	1	1.48857	2.96591	3.16956	1.92846	4.23631	4.88259	1.67951	high
TCGA-16-0846	0.326027	1	1.23703	2.45663	3.58515	1.83077	3.78963	3.83254	0.794219	high
TCGA-DB-A64S	2.28767	0	0.839426	2.67066	3.89735	2.51631	3.32565	4.08787	-0.0114675	high
TCGA-26-5133	1.23836	0	1.70405	1.6297	4.31672	1.95311	3.18669	4.61932	-0.167562	high
TCGA-06-0125	3.96712	1	1.46563	2.89311	3.26095	1.77715	3.39225	3.62067	1.03877	high
TCGA-HT-7695	1.21096	0	1.83144	1.82844	3.98033	3.11662	2.85974	2.4316	-1.18895	low
TCGA-27-2528	1.31507	1	1.29149	2.7047	3.14788	1.82167	3.83946	4.26032	1.2827	high
TCGA-HT-7603	1.93151	0	1.49573	1.44881	3.7325	2.44392	3.12153	2.74786	-0.66658	low
TCGA-DU-8168	1.18082	0	1.75455	1.86704	3.89714	3.8059	3.38926	1.5149	-1.5001	low
TCGA-E1-5322	10.8986	1	1.41624	2.15793	4.30657	2.78771	2.86291	3.95294	-0.808048	low
TCGA-S9-A6WG	6.67671	0	0.713489	3.06256	4.03965	1.69773	3.35102	4.20338	0.654583	high
TCGA-DU-A6S3	1.79726	0	1.39862	2.22287	4.78517	3.06416	3.0875	2.74744	-1.34003	low
TCGA-DU-A7TI	3.2411	1	1.2822	2.12212	4.09467	2.82874	3.16734	3.71333	-0.65176	low
TCGA-FG-A70Y	2.37808	0	0.608062	2.31718	4.07107	2.58017	3.14059	3.70188	-0.537291	low
TCGA-DB-A75K	1.00822	0	1.46127	3.06283	4.55732	3.2929	3.47526	3.08478	-0.68571	low
TCGA-DB-5274	6.27123	0	1.77016	2.57306	4.06253	3.09394	3.45394	2.25496	-0.603303	low
TCGA-14-0789	0.936986	1	1.57159	3.32177	3.33347	1.83983	3.88863	4.3586	1.56911	high
TCGA-HT-7474	0.312329	0	1.25583	1.71115	4.12925	2.92913	2.85761	3.31036	-1.17271	low
TCGA-HT-7880	0.443836	0	1.19898	2.22291	4.19058	2.49635	2.88422	3.4575	-0.639927	low
TCGA-HW-A5KJ	1.69589	0	1.3148	2.27526	4.18967	2.72605	2.95198	2.23774	-0.927338	low
TCGA-P5-A737	1.01918	0	0.900091	2.07605	4.03407	3.71427	2.99285	2.96906	-1.53735	low
TCGA-FG-7636	1.49041	0	2.02102	1.80641	4.24868	2.82929	3.056	3.56184	-0.817246	low
TCGA-27-2521	0.865753	0	1.19281	1.71304	3.79014	1.89375	3.79951	4.54514	0.395867	high
TCGA-TQ-A7RI	0.169863	0	1.91419	2.37849	3.61643	3.94383	3.0925	2.81576	-1.06565	low
TCGA-DU-8161	1.97808	1	1.61598	2.64348	2.77426	2.03797	3.40882	3.7675	1.08497	high
TCGA-28-1753	0.10137	0	1.56413	3.06948	3.19136	1.84612	3.82245	4.39762	1.49448	high
TCGA-VM-A8CF	1.66849	0	0.731414	2.47219	4.18466	1.72101	3.53564	4.34009	0.389728	high
TCGA-VW-A7QS	1.93425	0	0.345164	2.16442	3.63427	3.24394	3.61758	1.16463	-1.08083	low
TCGA-06-0130	1.07945	1	1.52712	3.50199	3.24487	1.25627	3.88618	4.55172	2.12259	high
TCGA-76-4931	0.764384	1	2.10615	3.38545	3.26453	2.01503	4.13588	4.35515	1.7606	high
TCGA-DU-5847	1.50137	0	1.35718	3.02786	3.36656	1.93001	3.95664	4.67447	1.39089	high
TCGA-CS-6188	1.9863	0	1.34989	2.97521	3.4604	2.05723	3.73499	3.8089	0.958738	high
TCGA-QH-A6CZ	0.764384	0	1.43561	1.89716	3.98092	2.84893	3.16535	1.90521	-1.00221	low
TCGA-P5-A5EZ	0.191781	0	1.49688	2.54919	4.21168	2.68967	2.94961	4.21178	-0.390244	low
TCGA-HW-7495	0.358904	0	1.46718	2.23816	4.02442	4.00621	2.94762	2.81457	-1.57673	low
TCGA-32-2632	0.736986	1	1.10661	2.32974	3.53013	1.29878	4.07335	4.51278	1.35663	high
TCGA-DU-A5TS	2.6411	0	1.0434	2.1055	4.41295	1.99348	3.39371	4.10541	-0.147509	high
TCGA-QH-A6XC	1.39178	0	1.55979	2.68861	4.01898	1.65686	3.52072	3.91426	0.727245	high
TCGA-HT-7481	4.93151	0	1.21861	1.92734	3.66482	3.14189	2.83408	2.94435	-1.03198	low
TCGA-DU-7007	5.24658	1	0.780641	2.77134	4.47477	1.86571	3.70063	4.33094	0.365982	high
TCGA-DB-5281	6.52329	0	1.21194	2.21597	4.03531	2.65009	2.92407	3.59831	-0.610394	low
TCGA-27-1832	0.821918	1	0.719381	3.30291	3.25486	1.49861	3.59313	4.51004	1.52829	high
TCGA-HT-7681	3.72329	0	1.46852	2.25955	4.14533	2.57214	3.12986	2.95522	-0.555632	low
TCGA-TQ-A7RP	2.50411	0	1.39774	2.94151	2.98544	2.12278	3.01507	4.17179	0.881248	high
TCGA-TQ-A7RJ	3.36712	0	0.905539	2.61744	4.05762	3.14582	3.42888	3.85912	-0.525526	low
TCGA-E1-A7Z2	1.09041	1	0.757583	2.75993	3.85021	2.60346	3.67331	3.78926	0.103899	high
TCGA-R8-A6ML	7.83562	0	1.85538	2.26942	4.28381	3.39005	3.08358	2.72178	-1.15974	low
TCGA-QH-A6X9	0.158904	0	1.98089	2.44973	4.09871	2.90987	3.37417	3.97458	-0.247261	high
TCGA-DH-A66B	3.50411	0	1.72164	2.64789	4.60275	2.70385	3.16187	3.56578	-0.533894	low
TCGA-E1-A7Z6	2.69589	1	0.739938	2.20612	4.0243	2.78569	3.02123	3.93597	-0.692477	low
TCGA-06-0745	0.654795	1	1.50989	2.95078	3.75734	1.46005	4.35199	4.43675	1.63599	high
TCGA-HT-7902	2.61918	0	1.12646	2.54515	4.25658	2.63537	2.79242	3.95937	-0.585285	low
TCGA-DU-5855	0.567123	0	2.14774	2.58497	4.72724	2.23567	3.3888	3.77381	-0.0779186	high
TCGA-DU-7290	0.863014	1	1.51256	2.71366	3.52238	1.8251	3.84085	4.69676	1.19893	high
TCGA-S9-A89Z	0.99726	0	0.959242	2.67539	4.05104	1.57103	3.52856	4.29589	0.702957	high
TCGA-FG-6692	1.13151	0	1.33988	3.32189	2.80407	1.8143	3.96503	4.20237	1.84693	high
TCGA-27-1837	1.16986	1	1.25013	2.89255	3.45338	1.73164	3.8375	4.10496	1.22383	high
TCGA-E1-A7YW	3.06849	1	0.530996	2.65549	4.35721	3.64745	3.42641	4.40357	-0.997966	low
TCGA-06-0138	2.01918	1	1.64318	2.67312	3.17363	1.26295	4.00046	4.02218	1.74166	high
TCGA-P5-A5F2	0.663014	0	0.584869	2.36996	4.29667	3.10665	3.16913	4.16359	-0.900712	low
TCGA-VM-A8CD	0.657534	1	1.44245	3.0859	2.57929	2.58318	3.53418	3.39301	1.00412	high
TCGA-HT-7881	0.243836	0	0.916555	2.02765	3.86208	2.84798	2.91803	3.01492	-0.908024	low
TCGA-TM-A7C5	4.10959	0	2.86176	2.12358	4.08915	3.16247	3.32306	2.90082	-0.598423	low
TCGA-12-3653	1.21096	1	1.99321	2.74464	3.19265	1.36534	3.88586	4.74253	1.84396	high
TCGA-CS-4944	0.884932	0	0.603177	2.05963	3.65077	1.78191	2.8506	3.124	-0.139231	high
TCGA-RY-A847	2.55616	0	1.13479	2.10838	3.96032	3.08607	2.71538	2.80702	-1.17605	low
TCGA-FG-8185	1.1863	0	0.985874	2.61652	4.45771	3.04335	3.42444	3.90837	-0.660184	low
TCGA-FG-A87Q	0.476712	0	1.38245	3.20734	3.57796	1.90995	3.28017	3.85191	0.890398	high
TCGA-DB-A75L	0.936986	0	1.09116	2.22374	3.96775	2.99434	3.37535	4.23312	-0.484954	low
TCGA-DU-6395	4.08493	1	1.20401	2.11713	4.30913	2.1559	3.33525	3.86463	-0.229781	high
TCGA-P5-A5F6	0.106849	0	1.55494	3.72188	4.34611	1.36903	3.87126	4.1827	1.46221	high
TCGA-06-0646	0.479452	1	1.18866	3.10644	3.158	1.72163	3.85534	4.12608	1.5019	high
TCGA-TM-A84B	2.07671	1	2.69921	2.58746	3.37854	2.22501	3.55275	3.81551	0.903991	high
TCGA-E1-A7YE	2.4274	1	0.334056	2.93	3.66626	2.52482	3.02992	4.20242	0.00337177	high
TCGA-02-2486	1.35068	0	1.42464	2.71272	3.11668	0.92496	3.70177	3.95209	1.81033	high
TCGA-02-0055	0.208219	1	1.30632	2.71915	3.2074	1.24647	3.90596	4.55311	1.73097	high
TCGA-TM-A84H	2.53699	0	1.53276	2.60453	4.19238	3.16139	3.39803	3.92234	-0.487603	low
TCGA-TQ-A7RQ	2.17808	0	2.62718	2.86797	4.51391	3.95384	3.172	2.63205	-1.18161	low
TCGA-DU-7019	2.19178	0	0.81195	2.29513	3.85939	2.41431	3.12615	3.47621	-0.320412	low
TCGA-VM-A8C9	2.50685	0	0.841863	2.71793	4.12702	1.18655	3.86806	3.92832	1.01804	high
TCGA-QH-A65S	0.210959	0	0.690337	2.14936	3.85084	2.76491	2.88777	3.72168	-0.723974	low
TCGA-76-4925	0.4	1	1.64237	3.04162	3.19675	1.46528	3.99784	4.73382	1.89853	high
TCGA-06-1804	1.13425	1	0.969355	3.06323	3.6337	2.29878	3.81704	4.45708	0.816544	high
TCGA-W9-A837	4.25479	0	1.30383	2.20694	3.90694	3.24602	2.99156	2.67317	-1.05376	low
TCGA-TM-A84M	2.06575	0	1.9845	2.29238	3.95934	3.67919	3.25022	2.67255	-1.05579	low
TCGA-S9-A6TY	2.61096	0	1.78237	1.83834	3.98896	3.27424	3.22881	2.90902	-1.03446	low
TCGA-S9-A6U9	7.99452	0	0.780284	2.53019	4.21508	2.70391	3.14229	4.0811	-0.49214	low
TCGA-14-0787	0.186301	1	1.41166	3.04039	3.17561	1.50623	4.35528	4.69364	2.00507	high
TCGA-76-4928	0.257534	1	0.771289	3.01258	3.03016	2.0634	4.20622	4.94189	1.53159	high
TCGA-DU-7006	0.956164	1	1.62266	3.23988	3.26012	1.86216	3.93248	4.2339	1.56647	high
TCGA-DU-7298	1.57808	1	1.90723	1.92662	4.22002	2.66118	3.67012	3.74739	-0.312339	low
TCGA-HT-7469	0.961644	1	2.45531	2.94113	4.00519	3.02465	3.89121	4.8176	0.481549	high
TCGA-P5-A72Z	0.969863	0	3.26822	2.85765	5.39848	3.25778	3.30846	1.54861	-1.20838	low
TCGA-E1-5304	3.4274	1	2.36515	2.6705	4.9783	2.7702	3.85673	4.69396	-0.0904923	high
TCGA-14-1823	1.48767	1	1.17333	2.73654	2.22342	1.38646	4.50181	4.69292	2.49919	high
TCGA-HT-8114	0.323288	0	1.30568	1.75669	4.09119	3.0782	3.49546	3.74501	-0.819913	low
TCGA-DU-5870	15.1945	0	1.56437	2.40395	3.66735	3.45567	2.92447	2.59408	-0.95411	low
TCGA-02-0047	1.2274	1	1.59146	2.8141	3.43751	1.81243	3.70849	3.8482	1.10316	high
TCGA-FG-7637	2.79452	0	1.34087	2.17131	3.72827	3.7971	3.0571	2.28401	-1.36835	low
TCGA-S9-A7R1	14.1534	1	1.23716	2.06797	3.93946	3.34648	3.06584	1.90475	-1.32206	low
TCGA-WY-A85B	3.81644	0	0.79524	2.16918	4.11513	3.26288	3.43102	3.89029	-0.872557	low
TCGA-06-0878	0.59726	0	1.9612	3.13234	3.04233	1.54861	4.11283	4.58855	2.07498	high
TCGA-TQ-A7RR	2.15616	0	0.712312	2.17746	4.38792	2.9449	3.20275	4.21765	-0.883811	low
TCGA-FG-8188	1.24658	0	0.897549	2.21665	4.11551	3.1075	3.10184	4.0033	-0.868433	low
TCGA-DB-A64L	2.01644	0	1.71058	2.08231	4.4564	3.34779	3.20635	2.56297	-1.31854	low
TCGA-HW-7490	1.60274	0	1.38843	2.36479	4.10471	2.45978	3.07046	3.62206	-0.333584	low
TCGA-06-0644	1.0274	0	1.52819	2.7788	2.86902	1.47175	3.98674	4.86593	1.94523	high
TCGA-P5-A5F4	0.632877	0	1.29895	2.05789	4.4886	2.76143	3.50386	3.74742	-0.682546	low
TCGA-FG-A60K	1.48493	0	1.86626	2.43507	4.07833	4.08949	3.02408	2.76118	-1.45217	low
TCGA-28-5209	1.21096	0	1.72649	2.77411	2.99987	1.67573	4.04882	4.52487	1.74478	high
TCGA-CS-4942	3.65753	1	1.42576	2.17726	3.88241	2.62875	3.28393	3.36111	-0.343835	low
TCGA-CS-5393	3.34795	0	1.19184	2.36238	4.3063	3.01459	2.93158	3.50393	-0.954639	low
TCGA-HT-8109	0.463014	0	1.42855	1.86929	3.72553	3.12777	2.94733	2.58004	-1.04832	low
TCGA-E1-A7YL	1.34795	1	1.02204	3.58269	3.49533	1.8388	4.09549	4.36732	1.59231	high
TCGA-E1-5319	7.96438	1	1.88149	2.03127	4.16647	2.65024	2.59263	2.97087	-0.909444	low
TCGA-P5-A5EW	0.558904	0	0.97337	2.12353	4.38061	2.30178	3.0076	3.43877	-0.655653	low
TCGA-QH-A6CW	1.13425	0	0.447184	2.73302	4.44535	3.64431	3.38174	4.04835	-1.11211	low
TCGA-S9-A6WN	1.32603	0	1.44661	2.82724	3.37728	2.20756	2.67103	3.1008	0.192371	high
TCGA-DH-A7UR	4.52055	0	0.982186	2.78335	4.54948	3.34991	3.68851	2.77808	-0.906988	low
TCGA-QH-A6CU	1.23562	0	0.478042	2.28205	3.6029	2.30581	2.78875	3.15464	-0.407642	low
TCGA-HW-8321	1.63288	0	1.35233	2.63608	4.14566	2.5153	3.27353	3.8485	-0.126891	high
TCGA-DU-6408	9.50685	1	1.11013	2.53426	4.28034	2.28032	3.15948	3.76705	-0.219402	high
TCGA-HT-7879	0.306849	0	0.845576	2.56159	3.87665	3.60232	3.25944	3.95341	-0.837633	low
TCGA-S9-A6WD	5.79178	0	0.960185	2.25086	4.14892	3.29688	3.10096	3.15545	-1.13648	low
TCGA-DB-A64U	2.31781	0	1.86531	2.38315	4.46681	3.59455	3.1935	3.16779	-1.20801	low
TCGA-DU-6405	1.65753	1	1.50791	2.98991	3.26304	2.57336	3.53081	4.06849	0.709498	high
TCGA-S9-A7IS	0.660274	1	1.08665	2.78323	4.08953	2.28369	3.13409	4.40025	0.103573	high
TCGA-DB-A64W	1.2	1	1.76574	2.41349	4.09223	2.73631	3.64087	3.02665	-0.226944	high
TCGA-HW-A5KM	1.72603	0	1.98155	2.18923	4.13251	2.42738	3.48375	3.18656	-0.155693	high
TCGA-DU-7300	5.16712	1	2.10868	1.89573	4.20187	2.70566	2.86075	2.40972	-0.94962	low
TCGA-TQ-A7RO	2.6	0	1.27243	2.59098	3.71193	3.62973	3.17324	2.92892	-0.882941	low
TCGA-E1-5302	4.17808	1	1.65879	2.088	4.1043	2.61252	3.07311	3.16774	-0.592598	low
TCGA-06-5418	0.227397	1	1.79758	3.5146	3.19051	1.32556	4.06349	3.5454	2.08032	high
TCGA-S9-A7R3	8.25479	0	0.657627	1.95917	3.82106	2.91344	3.33079	4.15587	-0.60631	low
TCGA-P5-A72X	1.10411	0	0.598348	3.04021	4.26682	2.55377	3.04816	3.93766	-0.28407	low
TCGA-DU-A5TT	2.03562	0	1.48014	2.87451	3.27827	1.89331	3.84206	4.52055	1.33214	high
TCGA-FG-A4MT	3.18904	0	1.02641	2.32382	4.04277	2.85098	3.20713	3.03959	-0.694622	low
TCGA-HT-8012	0.783562	0	1.88517	2.73592	4.61634	3.4828	3.34038	3.10947	-0.978041	low
TCGA-DU-A7TB	4.29315	0	3.14386	2.21433	4.78378	1.56613	2.86705	3.7484	0.106541	high
TCGA-06-0882	0.452055	0	1.49299	3.10801	2.93481	1.62402	3.72893	4.38554	1.7433	high
TCGA-28-5216	1.13699	0	0.920002	2.44447	3.31979	1.54414	4.25296	4.35634	1.38925	high
TCGA-06-0686	0.783562	0	1.5893	2.67933	3.68059	1.41671	4.02507	4.45401	1.4321	high
TCGA-HT-7479	0.591781	0	1.09242	2.1568	4.10456	2.26434	2.87494	3.86403	-0.422601	low
TCGA-DU-8163	1.72329	0	1.49685	2.59209	3.86052	3.14227	3.14285	3.91948	-0.429115	low
TCGA-06-5856	0.312329	1	2.14739	2.36011	3.576	1.43256	4.42068	4.56963	1.66481	high
TCGA-QH-A65V	1.05205	0	0.855009	2.18673	3.87602	2.69516	2.82367	2.92606	-0.812348	low
TCGA-S9-A7J2	0.169863	0	1.85124	2.92017	4.35052	3.70705	3.35906	2.91541	-0.920539	low
TCGA-HT-7608	1.83836	0	0.814629	1.9535	3.77496	2.58455	2.61295	2.7114	-0.94764	low
TCGA-27-2523	1.33973	1	1.68137	2.61676	3.52222	1.56531	4.24091	4.2104	1.47635	high
TCGA-DB-5279	3.70959	0	0.710293	1.60813	3.68498	2.28255	3.06412	2.82285	-0.63842	low
TCGA-19-0957	1.82466	1	1.89789	2.15476	3.89854	2.06305	3.27548	3.63633	0.162449	high
TCGA-41-5651	0.961644	0	2.72902	2.02305	4.03186	2.00796	3.98297	4.05939	0.669961	high
TCGA-HT-A618	1.40274	0	1.32616	2.39856	4.07474	2.32639	3.13302	3.91137	-0.140815	high
TCGA-FG-5963	1.49863	0	0.972721	2.63841	4.09388	2.11094	3.26049	4.34436	0.175268	high
TCGA-P5-A5EX	0.665753	0	1.21421	2.93329	3.8561	1.60359	3.18151	3.24413	0.609842	high
TCGA-FG-A710	3.05479	0	1.66316	2.63479	4.35605	3.14372	3.16587	2.9344	-0.819179	low
TCGA-QH-A6CX	1.01918	1	0.799418	2.71452	3.65903	1.58281	3.28393	3.74195	0.679897	high
TCGA-DU-6400	0.10137	1	1.63751	2.52909	4.26546	3.43287	3.11903	2.53333	-1.11426	low
TCGA-E1-5307	4.8274	1	1.06145	1.75365	4.15984	3.57549	2.76942	3.78838	-1.60364	low
TCGA-FG-7634	1.27945	0	1.60247	2.5781	3.75018	3.09755	3.23952	3.45515	-0.355159	low
TCGA-12-0618	1.08219	1	2.70257	2.65355	3.95396	1.912	4.07272	4.00396	1.11565	high
TCGA-HT-7483	14.3973	0	1.06333	2.14784	3.73219	2.96432	3.24573	3.83755	-0.510212	low
TCGA-32-2634	0.739726	0	1.49743	2.48969	3.58114	2.24793	4.05005	5.24939	0.97338	high
TCGA-41-3915	0.986301	1	1.02083	3.15616	3.76232	1.81793	4.07399	4.3502	1.23264	high
TCGA-DU-A6S8	1.85753	0	2.69976	2.03437	4.64943	3.30916	3.41643	3.01826	-1.02509	low
TCGA-06-2559	0.410959	1	1.58597	3.09739	3.40483	1.95172	3.94649	4.36542	1.37746	high
TCGA-27-1834	3.37808	1	1.64011	2.68843	3.44223	1.79806	3.56677	4.11789	1.03638	high
TCGA-06-5410	0.29589	1	1.03512	2.88129	2.82781	1.24879	3.547	4.24384	1.72959	high
TCGA-P5-A72W	0.868493	0	0.664189	2.33769	4.4549	2.13902	3.58048	4.04857	-0.153775	high
TCGA-E1-A7Z4	12.0877	1	1.1916	2.04885	4.24754	2.95264	3.06018	4.07891	-0.86526	low
TCGA-19-5960	0.452055	0	2.08938	2.03023	3.75747	2.55925	4.17718	4.47681	0.493511	high
TCGA-HT-7605	0.380822	0	1.0919	2.06696	3.87175	3.09493	2.87881	2.81035	-1.07853	low
TCGA-DB-A64X	1.54247	0	0.526218	2.53554	4.39446	2.40639	3.48568	4.02823	-0.283367	low
TCGA-HT-A74L	0.920548	0	1.07782	2.42973	3.47392	3.81479	3.26762	2.88168	-0.953846	low
TCGA-06-0141	0.857534	1	1.10433	3.06159	2.54758	1.49204	4.1039	3.9963	2.06365	high
TCGA-32-5222	0.452055	0	1.51019	1.99298	2.4671	0.792664	3.9446	4.67818	2.18665	high
TCGA-15-1444	4.21096	1	1.12876	2.42786	3.49804	2.04987	3.21344	3.60758	0.329481	high
TCGA-HT-A615	1.41096	0	1.25247	2.19064	4.27458	3.09996	3.41998	3.0727	-0.896507	low
TCGA-HT-7611	4.8	0	0.807181	2.15795	4.07643	2.87928	3.4077	4.05197	-0.578909	low
TCGA-HT-7693	1.46027	0	0.522402	2.82666	4.25013	1.73328	3.84246	4.03687	0.572123	high
TCGA-26-5135	0.739726	1	1.6114	3.71774	3.93561	1.53695	3.94083	3.94519	1.58491	high
TCGA-CS-6186	1.47397	1	2.03047	2.77279	3.27274	2.3149	3.47488	4.11404	0.864219	high
TCGA-TM-A84F	4.92055	0	0.623132	2.54573	3.49744	2.5851	3.27518	3.77465	-0.0198963	high
TCGA-TQ-A7RG	1.6411	0	1.93123	2.48496	4.01645	3.8195	3.08898	2.67783	-1.17989	low
TCGA-P5-A780	0.19726	0	1.15629	2.85163	4.40661	2.61538	3.20243	4.28888	-0.235979	high
TCGA-HT-7604	10.2055	0	1.36012	1.56779	4.25025	3.38969	3.54121	3.86135	-1.15574	low
TCGA-DU-6397	3.83836	1	1.0586	2.10142	4.34059	3.34101	2.93401	2.76733	-1.47984	low
TCGA-TM-A84S	1.24384	0	0.936401	2.21623	3.67638	3.55595	2.8157	3.0151	-1.23282	low
TCGA-26-5134	0.457534	0	1.12059	2.37292	3.4515	2.16151	3.7161	4.17166	0.605908	high
TCGA-76-4927	1.46575	1	1.5343	2.78146	3.07964	1.34455	3.91994	4.31012	1.78069	high
TCGA-06-0210	0.616438	1	2.19377	2.82419	3.08515	1.50328	4.13863	4.43643	1.96662	high
TCGA-19-1390	2.11507	1	0.701065	2.54324	4.18774	2.15177	4.19766	3.81346	0.365386	high
TCGA-DU-5852	0.561644	1	1.97323	2.89463	3.96182	1.79172	3.52098	4.17223	0.905196	high
TCGA-HW-8319	0.717808	0	1.45932	2.44921	4.23375	3.49743	3.20545	4.07497	-0.897586	low
TCGA-HT-A614	0.224658	0	1.15454	2.61033	4.22629	2.92555	2.9044	3.77913	-0.700958	low
TCGA-FG-6690	0.391781	0	0.909309	1.88985	3.94812	3.51629	3.06162	3.40515	-1.33203	low
TCGA-27-1835	1.77534	1	1.11351	3.1678	3.45126	1.2002	3.77266	4.78507	1.77564	high
TCGA-FG-7638	1.87945	0	1.54733	2.16924	3.91837	2.59193	2.71469	2.58353	-0.742402	low
TCGA-P5-A5F0	0.786301	0	1.79414	2.22913	4.11167	2.99844	3.19334	2.5037	-0.816137	low
TCGA-R8-A6MO	2.72055	0	1.42943	2.56502	4.54348	3.31566	2.99273	2.97725	-1.20459	low
TCGA-DB-5273	6.83014	0	0.572359	2.16738	3.86114	2.40572	3.03462	3.44525	-0.481179	low
TCGA-32-2638	0.613699	0	1.53983	3.16586	3.46852	1.59769	3.85279	4.43541	1.5678	high
TCGA-E1-A7YI	0.30411	1	1.23811	2.78912	4.7917	2.57765	4.11062	5.06866	0.153966	high
TCGA-FG-8187	1.67397	0	1.07447	2.32594	3.85158	3.40712	2.70352	3.28616	-1.15682	low
TCGA-E1-A7YY	12.1781	1	1.77385	2.15226	4.33644	2.45645	3.1145	2.42354	-0.675791	low
TCGA-HT-7473	1.37808	0	1.06461	2.2078	3.81522	1.87166	3.35674	4.04702	0.298635	high
TCGA-RY-A845	1.63288	0	1.71723	2.29612	3.98859	3.22857	3.33242	3.64569	-0.610328	low
TCGA-06-0129	2.80548	1	0.998273	2.14197	4.17496	2.6899	4.22445	4.61136	0.0361635	high
TCGA-DU-5872	1.45753	0	1.26804	3.03451	4.13095	1.78065	3.57522	4.16284	0.758462	high
TCGA-P5-A77X	0.287671	0	1.00339	2.10625	3.96141	3.20411	2.99284	2.77719	-1.15119	low
TCGA-DH-A66D	2.31781	0	1.34385	2.9233	4.5116	3.51789	3.25622	3.69462	-0.905009	low
TCGA-HW-7486	1.66849	0	1.10491	2.09373	3.89643	3.09688	2.88043	3.0492	-1.03438	low
TCGA-IK-7675	1.58356	1	1.49072	2.90544	4.18264	2.22867	2.91478	4.47313	0.137345	high
TCGA-HT-7689	1.24658	0	1.53944	2.10345	4.04213	3.11982	3.37234	3.82423	-0.648063	low
TCGA-DH-A669	2.51781	1	1.6232	2.97248	4.36679	1.74155	4.37007	3.26468	0.935797	high
TCGA-19-2619	0.805479	0	1.57512	3.06925	3.27729	2.27615	3.77668	3.67521	1.00715	high
TCGA-E1-A7YJ	1.62192	1	1.28558	3.67798	4.10496	2.02687	3.79532	4.48699	1.09439	high
TCGA-S9-A6TW	3.15342	0	2.37877	2.65772	3.65793	2.44122	3.3169	2.88319	0.280271	high
TCGA-S9-A6TU	7.26027	0	1.12513	2.54607	4.89581	2.66541	3.31499	4.03443	-0.691794	low
TCGA-DH-5143	1.2	0	0.907026	1.5024	4.09732	2.80953	3.18592	3.52033	-1.04892	low
TCGA-DU-7304	1.94247	1	1.24999	2.18632	4.14097	2.1754	3.05188	3.84116	-0.250383	high
TCGA-06-0132	2.11233	1	1.26743	2.35913	3.326	1.70342	3.41689	3.60946	0.758402	high
TCGA-HT-7873	0.816438	0	0.748828	2.97115	3.84134	3.55176	3.64692	4.46688	-0.318092	low
TCGA-E1-A7YQ	4.32329	1	1.24232	3.53974	3.71845	1.98139	3.77868	4.14913	1.19844	high
TCGA-DU-7011	8.76712	1	1.24682	2.08594	3.69745	2.11784	3.14393	3.66234	0.00428856	high
TCGA-14-0790	1.14795	1	1.72413	2.46521	2.90005	1.83584	3.58154	4.48022	1.29996	high
TCGA-06-2561	0.772603	0	1.57712	3.63573	3.21292	1.48483	3.69781	4.17696	1.90167	high
TCGA-28-2513	0.608219	0	1.01414	3.1966	2.68486	1.36289	4.07975	4.10447	2.12612	high
TCGA-WY-A85C	3.90685	0	0.245799	2.30443	4.47144	2.46556	3.53359	4.30653	-0.466083	low
TCGA-FG-6688	0.605479	0	1.33621	2.39235	3.5163	2.16629	3.237	3.88752	0.330378	high
TCGA-DU-A76K	0.950685	1	1.47303	2.57553	3.65296	2.24904	3.28526	3.02452	0.186001	high
TCGA-HT-A74J	0.876712	0	1.04355	2.8104	4.22759	2.9761	3.3193	3.88452	-0.434616	low
TCGA-VM-A8CH	1.95616	0	0.513904	2.45786	4.20579	2.89451	3.34748	4.23108	-0.577568	low
TCGA-14-1402	2.67123	1	1.48756	2.29611	2.41952	1.21299	4.27466	4.62384	2.23074	high
TCGA-TQ-A7RW	2.24932	1	1.84486	2.63594	4.21783	2.6228	3.50454	4.26675	0.0571414	high
TCGA-HW-7487	1.12055	0	1.80692	2.17757	4.27318	2.78133	2.9646	2.83621	-0.839843	low
TCGA-DB-A64O	2.12329	1	1.37233	2.65837	3.52568	1.85933	3.35479	3.62315	0.68047	high
TCGA-DU-6404	11.1452	1	0.725455	3.17826	2.99938	2.911	3.75239	4.00201	0.655047	high
TCGA-S9-A6UB	8.86575	0	1.75298	2.00423	4.62684	3.68238	3.35553	2.29883	-1.64099	low
TCGA-S9-A6TX	2.87397	0	1.70447	2.82332	4.59426	3.28681	3.19638	3.02435	-0.917917	low
TCGA-DH-A66F	1.43288	0	1.2713	2.39418	3.95418	3.5487	2.99301	2.5297	-1.22424	low
TCGA-FG-7643	0.80274	0	1.43679	2.04304	3.81165	2.06649	3.00336	3.25599	-0.149343	high
TCGA-WY-A85D	3.14247	0	0.335727	2.50888	4.17207	2.5341	3.4714	4.29941	-0.255662	low
TCGA-DU-6392	17.5973	0	2.51142	2.79566	4.41914	1.78583	3.96082	3.65024	0.845107	high
TCGA-DU-7292	0.663014	1	1.74176	2.10763	3.94586	2.13658	3.10035	3.20737	-0.135167	high
TCGA-DB-A75O	2.56164	0	0.296299	2.53135	3.95086	2.49898	3.08494	3.74061	-0.3984	low
TCGA-FG-8186	1.33425	0	0.956402	2.45951	3.50352	3.21248	3.41297	3.16975	-0.453567	low
TCGA-06-0747	0.224658	1	1.0559	3.67437	3.53092	1.64071	4.52043	4.57029	2.00689	high
TCGA-DU-6396	6.26301	1	1.53051	2.9494	4.70442	2.0194	3.48179	3.98217	0.208866	high
TCGA-P5-A77W	1.6	0	2.4452	2.60622	4.36928	2.96735	3.27542	3.00113	-0.486647	low
TCGA-27-1830	0.421918	1	1.39424	3.29195	3.30917	1.94403	4.00061	4.30755	1.5073	high
TCGA-06-5414	0.747945	0	1.84895	3.45604	3.11169	1.75417	3.78984	4.32279	1.82163	high
TCGA-06-0645	0.479452	1	1.07909	3.30809	3.33907	1.48538	3.96772	4.31952	1.7236	high
TCGA-P5-A731	0.750685	0	0.858618	2.64182	3.59633	1.89665	3.44487	3.74313	0.563238	high
TCGA-28-5220	0.873973	0	1.34801	1.80764	2.8797	1.41709	4.05327	4.4404	1.42032	high
TCGA-02-2485	1.28767	0	2.14805	2.48633	3.29789	1.64326	3.9721	4.08818	1.43133	high
TCGA-HT-A61A	0.531507	0	1.33805	2.1475	4.18508	2.37616	3.09142	2.70089	-0.594336	low
TCGA-FG-8182	1.13973	0	1.77177	2.68537	4.17843	3.61136	3.13436	3.58885	-0.882781	low
TCGA-RY-A840	2.33973	0	1.59461	2.4425	3.95752	3.06712	3.42382	2.79929	-0.545011	low
TCGA-S9-A6U1	1.46849	0	0.989789	2.20883	4.16829	3.17921	3.4446	3.95737	-0.766434	low
TCGA-WY-A859	3.32329	0	1.06615	1.86403	4.59521	2.87164	2.99345	3.6815	-1.22997	low
TCGA-TM-A84C	1.34795	1	0.946251	4.12178	2.81198	2.07842	3.13772	3.672	1.4601	high
TCGA-76-4926	0.378082	1	1.7888	2.88628	2.79564	1.9844	4.01452	4.27369	1.65946	high
TCGA-DU-7008	13.0192	0	1.54565	1.99427	3.88608	2.7006	3.50154	3.10632	-0.393857	low
TCGA-06-2563	0.709589	0	2.2224	2.93891	3.26973	1.68991	4.1625	4.99084	1.91015	high
TCGA-DB-A4XA	1.56986	0	1.18512	2.81452	4.34018	2.99151	2.98385	3.08226	-0.788412	low
TCGA-DU-7013	0.736986	1	3.00688	2.22355	3.95443	2.04876	3.52774	4.24306	0.648431	high
TCGA-HT-A5RC	0.443836	1	1.70796	3.47968	3.33735	1.88997	3.61256	4.22721	1.47752	high
TCGA-E1-5305	6.66575	1	1.056	1.74743	3.99281	3.1201	3.29563	3.0244	-1.08001	low
TCGA-DB-A64R	2.61644	0	1.83557	2.55902	4.25345	3.99564	3.09411	2.65325	-1.41877	low
TCGA-DU-6406	1.40274	1	1.56569	2.89503	3.51185	1.99869	3.92175	4.48039	1.1903	high
TCGA-DB-A4XG	6.07945	0	1.35923	2.26294	3.82272	3.56099	3.22062	1.87244	-1.20634	low
TCGA-E1-5311	11.189	1	1.30992	2.01653	4.33141	3.58116	3.07744	2.78298	-1.54813	low
TCGA-S9-A6WM	1.65479	0	1.82021	2.91024	3.65868	2.27857	3.43427	4.55099	0.7493	high
TCGA-14-0817	0.449315	1	1.05355	2.13687	3.08057	1.28052	4.25785	4.88792	1.6781	high
TCGA-DU-A7TC	3.11507	0	0.935524	1.91589	4.13226	2.75521	3.3889	3.425	-0.739459	low
TCGA-S9-A7J0	1.66849	0	1.33464	2.96236	4.41437	2.67164	4.05505	4.51716	0.283571	high
TCGA-27-2519	0.865753	0	1.36977	2.55696	3.09065	1.49763	3.82146	4.29656	1.47481	high
TCGA-41-2572	1.11233	1	1.71663	3.43626	3.06596	1.75353	3.44945	4.29628	1.63406	high
TCGA-DU-6402	0.586301	1	1.20967	3.60875	2.83672	1.53397	3.8169	4.53429	2.11342	high
TCGA-28-5215	0.917808	1	1.35849	2.51418	3.32038	1.77805	3.64631	4.1579	1.02026	high
TCGA-06-0171	1.09315	1	1.17428	3.32213	3.74451	1.98828	3.43604	3.97594	0.855034	high
TCGA-FG-7641	0.857534	0	1.96525	2.222	3.91498	3.35734	2.94064	2.57622	-1.02596	low
TCGA-06-5416	0.558904	0	0.792272	2.55694	3.78379	1.39822	4.27804	4.13432	1.22424	high
TCGA-DU-6394	1.86849	1	1.42139	1.95132	4.02697	3.36148	3.21486	2.85706	-1.15358	low
TCGA-TM-A84T	1.98356	0	0.94968	2.15289	4.38616	3.3562	3.33539	3.9848	-1.09463	low
TCGA-HT-7607	0.263014	1	1.55428	1.94067	3.96454	2.34169	2.87055	2.80029	-0.593615	low
TCGA-DU-A7TD	0.624658	1	2.16276	2.92793	3.6479	2.55792	3.69148	4.24431	0.724793	high
TCGA-DU-7294	7.86027	0	2.52917	1.97111	3.79753	3.30677	2.98255	2.77801	-0.869062	low
TCGA-28-5218	0.430137	1	0.449396	3.91907	2.93261	1.50254	3.69235	4.53891	2.00586	high
TCGA-DB-A64Q	0.49863	0	1.20374	2.46777	3.89919	3.44693	3.19171	2.93804	-0.930501	low
TCGA-14-1829	0.59726	0	1.04383	1.49791	1.67632	0.902581	4.35393	4.13033	2.3267	high
TCGA-HT-A617	1.34521	0	1.52494	2.59377	3.21168	2.30354	3.34754	3.94801	0.616384	high
TCGA-P5-A733	1.13425	0	0.486738	1.78897	3.83818	2.53785	3.01163	3.70691	-0.724646	low
TCGA-06-5412	0.378082	1	1.41656	3.09616	2.72149	0.936536	3.97461	4.40421	2.43004	high
TCGA-S9-A6WH	2.70411	0	1.5887	2.58606	4.90043	3.49141	3.31943	2.96302	-1.31872	low
TCGA-HT-8018	3.15616	1	1.35688	2.46845	3.9965	2.22785	3.08993	3.36117	-0.109751	high
TCGA-DH-A7UU	0.287671	0	0.534867	2.76559	4.09182	3.05322	2.71756	4.1884	-0.788841	low
TCGA-E1-A7YO	6.25205	1	1.35817	2.52662	4.49016	3.88419	2.96234	2.55428	-1.68091	low
TCGA-S9-A6TZ	2.39178	0	0.977325	2.5809	3.69797	3.21962	3.26819	3.88702	-0.449191	low
TCGA-DU-A6S7	1.74795	0	1.16619	2.32515	4.43604	2.47121	3.41369	4.33778	-0.295832	low
TCGA-TM-A7C4	4.0274	0	1.40841	2.03002	4.00022	2.66855	3.28778	3.82022	-0.428799	low
TCGA-19-2629	2.01918	1	1.41499	1.6124	4.1241	1.86527	3.9709	3.66698	0.153286	high
TCGA-12-0616	1.2274	1	1.10123	2.27977	3.88562	1.32108	4.20016	4.55005	1.18493	high
TCGA-DB-A4XE	3.12055	0	1.51769	2.35195	3.74445	2.94168	3.21616	3.61627	-0.358855	low
TCGA-HT-7602	2.48767	0	0.874698	2.28984	3.49405	2.28327	2.6096	3.61137	-0.24968	high
TCGA-26-5132	0.783562	0	0.710141	2.77501	3.66945	1.91921	3.93124	3.9407	0.819319	high
TCGA-TM-A7CA	2.89863	0	1.29026	2.38389	4.41799	3.08716	3.30283	3.25555	-0.892897	low
TCGA-DU-A6S6	7.92603	0	1.20386	2.63304	4.28397	3.37833	3.38667	2.39637	-1.02103	low
TCGA-DU-5854	0.70411	0	1.47607	3.00405	3.79452	2.0038	3.295	3.82114	0.627556	high
TCGA-QH-A6CY	1.11781	0	1.22758	2.10102	3.87405	2.6031	2.91205	2.68812	-0.709143	low
TCGA-P5-A5EY	0.19726	0	1.24924	2.1732	4.078	1.83046	2.61847	3.43418	-0.28041	low
TCGA-06-0744	1.63014	0	1.73886	3.41567	3.35575	1.40954	3.49066	4.58368	1.76744	high
TCGA-HT-8563	2.35616	0	1.52689	2.82358	3.51411	2.23597	3.6592	4.2895	0.820496	high
TCGA-HT-7606	1.4411	0	1.26143	2.56336	3.76489	2.45996	4.1256	2.3331	0.227819	high
TCGA-06-5858	0.512329	0	1.76772	2.6034	3.37424	1.6408	3.85596	3.93512	1.27904	high
TCGA-06-5417	0.424658	0	1.06395	1.88018	3.20733	1.97271	3.85218	4.10677	0.675123	high
TCGA-CS-6669	0.616438	0	1.74683	1.57122	4.55548	1.94869	2.90172	2.29857	-0.877947	low
TCGA-HT-A616	0.150685	0	1.35266	1.72628	3.97732	2.37619	3.13907	3.13785	-0.57678	low
TCGA-DB-A64P	2.50959	0	1.38892	2.55301	4.13133	2.45671	3.10182	2.10715	-0.510134	low
TCGA-VW-A8FI	0.671233	1	2.24741	2.74971	3.54701	2.00484	3.16762	4.01932	0.780929	high
TCGA-DU-A6S2	2.12877	0	1.56177	2.42998	4.68929	3.43066	2.85193	2.68296	-1.5252	low
TCGA-26-5136	1.58082	1	0.96056	2.58207	3.43186	1.69091	3.83382	4.57007	1.13082	high
TCGA-HT-8110	1.14795	0	1.97864	2.59297	3.1594	1.91416	3.64858	3.80799	1.13091	high
TCGA-DU-5874	1.26301	0	1.29287	2.14838	4.47062	3.8645	3.28681	2.60587	-1.68304	low
TCGA-HT-8010	0.136986	0	1.3191	2.23618	3.92628	2.48409	2.68619	2.91721	-0.645665	low
TCGA-HW-A5KK	1.06301	1	1.27271	3.05402	3.90055	1.7809	3.30542	3.9159	0.719708	high
TCGA-DU-7306	3.49863	0	2.01209	2.47961	4.31501	1.67024	3.23278	3.36107	0.302266	high
TCGA-QH-A6X3	0.857534	0	0.748361	2.2839	3.71883	2.12778	3.42181	3.76359	0.132333	high
TCGA-DB-A75P	1.34795	0	0.916178	2.75774	4.27703	1.9543	3.02044	3.60925	-0.0296534	high
TCGA-12-5295	1.24384	1	0.634667	1.88353	2.82839	0.908817	4.3655	4.70594	1.87804	high
TCGA-DH-5141	2.65205	0	1.23581	2.07446	3.94356	2.44271	3.08341	2.5911	-0.583404	low
TCGA-DU-7302	5.02466	0	1.92622	2.10254	3.96199	2.91807	3.04972	2.65968	-0.754854	low
TCGA-DU-6407	7.87671	1	1.02189	2.58266	3.81823	2.57814	3.81388	4.19881	0.253459	high

## Sheet: CGGA
id	futime	fustat	HDAC9	HDAC7	HDAC5	HDAC4	HDAC3	HDAC1	riskScore	risk
CGGA_1424	5.43288	0	1.70492	1.11677	2.21278	2.0849	1.83698	1.63049	-0.526221	low
CGGA_1455	5.33151	0	1.76324	1.43603	2.09075	2.27031	1.87642	1.37733	-0.438556	low
CGGA_1469	5.26575	0	1.54686	1.2777	2.1015	2.10632	1.91899	1.56411	-0.403725	low
CGGA_1446	5.35616	0	1.49512	1.28797	2.0002	2.19787	1.87159	1.81863	-0.392109	low
CGGA_1445	5.35616	0	0.827265	1.93112	2.78328	2.21936	2.349	2.28674	-0.357106	low
CGGA_641	9.34521	1	2.10331	2.05414	2.75921	2.68133	2.38806	2.04723	-0.341445	low
CGGA_892	1.2274	0	1.83486	1.8644	2.64449	2.60585	2.51703	1.93396	-0.331727	low
CGGA_1474	0.912329	0	1.79217	1.32706	2.21278	2.10194	1.98019	1.91055	-0.294134	low
CGGA_1467	2.3726	1	1.81682	1.39153	2.30169	1.96701	1.86174	1.87944	-0.28232	low
CGGA_P271	1.94521	0	1.32067	1.39699	2.28469	1.9816	2.02733	2.00871	-0.280472	low
CGGA_1350	5.7726	0	1.82157	1.7396	2.33779	2.36007	2.07488	1.94252	-0.277263	low
CGGA_P158	2.31233	0	1.6674	1.27074	2.14596	1.95035	2.01581	1.44556	-0.274276	low
CGGA_822	6.12877	1	1.48889	1.94694	2.78016	2.53076	2.6031	2.35467	-0.27405	low
CGGA_551	10.2137	0	1.86314	2.00353	2.56818	2.55663	2.29264	2.08327	-0.267434	low
CGGA_P153	2.2411	0	1.67248	1.42337	2.21176	2.05213	1.90682	1.98582	-0.262327	low
CGGA_254	11.3507	0	1.52695	2.05007	2.59751	2.42754	2.19618	2.31708	-0.253847	low
CGGA_1317	5.89589	0	1.77664	1.80078	2.33756	2.36625	2.11796	1.88793	-0.249244	low
CGGA_P165	1.63836	1	1.75499	1.58421	2.31921	2.14644	2.15217	1.57821	-0.239971	low
CGGA_1494	0.736986	1	1.79217	1.24189	2.21481	1.93525	1.95323	1.99849	-0.222801	low
CGGA_762	9.51781	0	1.89346	2.09674	2.63691	2.41693	2.18263	2.05835	-0.220375	low
CGGA_1100	7.11233	0	2.37875	1.98472	2.51119	2.69415	2.32213	2.03525	-0.219146	low
CGGA_662	0.778082	1	1.82768	2.03833	2.45353	2.55567	2.18351	2.27077	-0.213699	low
CGGA_908	6.67397	1	1.74704	1.87913	2.75675	2.45728	2.44409	2.66496	-0.213222	low
CGGA_583	8.51233	1	1.39918	1.12145	1.86214	1.82572	1.75798	1.89623	-0.209253	low
CGGA_510	10.3288	0	2.19159	2.12135	2.5841	2.51495	2.14341	2.00568	-0.209026	low
CGGA_1101	0.586301	1	1.67248	2.07955	2.42811	2.43696	2.04152	2.29278	-0.200382	low
CGGA_501	10.4055	0	1.49903	2.18749	2.53696	2.70648	2.47311	2.35236	-0.200181	low
CGGA_D29	8.68767	0	1.53504	2.04389	2.4385	2.30296	2.10082	1.93874	-0.197001	low
CGGA_1368	5.71233	0	2.18832	1.57694	2.40005	2.29237	2.23777	1.88418	-0.196039	low
CGGA_858	9.20274	0	1.85709	1.88967	2.63725	2.26981	2.39203	1.81734	-0.168703	low
CGGA_1660	1.1863	0	1.51221	1.73584	2.822	2.04931	2.38058	2.51022	-0.156661	low
CGGA_D45	2.34521	0	1.9697	2.17575	2.79098	2.46704	2.56731	1.76015	-0.146501	low
CGGA_760	9.53151	0	1.56993	2.07399	2.58856	2.25421	2.22423	2.05256	-0.144794	low
CGGA_P175	0.50137	1	1.4563	1.69065	2.21414	2.04987	1.93976	2.10762	-0.139997	low
CGGA_1061	1.45753	1	1.96866	1.85939	2.74547	2.42528	2.52558	2.50493	-0.134904	low
CGGA_1526	4.92603	0	1.94632	2.07754	2.48366	2.65136	2.39871	2.394	-0.12009	low
CGGA_D15	8.7589	0	2.38836	2.2648	2.78669	2.58061	2.38176	2.10357	-0.118257	low
CGGA_1197	2.58082	1	1.47555	2.20526	2.80602	2.34261	2.50809	2.18154	-0.118018	low
CGGA_1291	6	0	1.62261	2.34154	2.84395	2.50896	2.66635	1.94091	-0.116498	low
CGGA_1647	4.17808	0	0.941998	1.94234	2.729	2.04359	2.58738	1.96896	-0.115308	low
CGGA_1050	8.32877	0	2.03278	2.17264	2.62233	2.38497	2.38635	1.57889	-0.107082	low
CGGA_1635	0.909589	1	1.73654	1.39699	2.04336	1.73758	1.67073	1.80502	-0.105829	low
CGGA_1569	3.85205	0	1.34146	2.19639	2.76414	2.46443	2.69168	2.25686	-0.103534	low
CGGA_1699	3.79178	0	1.73216	1.37761	2.16708	1.86076	2.10522	1.55167	-0.0961099	low
CGGA_1365	0.693151	1	1.9489	1.56768	2.23319	2.14772	2.11018	2.0463	-0.0955985	low
CGGA_598	10.074	1	1.88782	2.0714	2.6797	2.42528	2.46246	2.2159	-0.0950434	low
CGGA_1903	2.15068	0	1.50496	2.11193	2.81253	2.22926	2.52531	2.09157	-0.0923191	low
CGGA_1198	6.43562	0	1.86309	1.46037	2.04393	1.96984	2.00388	1.5144	-0.0884175	low
CGGA_J030	7.60274	0	1.927	2.04527	2.63107	2.34836	2.41269	2.02185	-0.0799023	low
CGGA_273	7.21918	1	1.97998	1.56462	2.78839	2.16558	2.6183	2.51002	-0.0789052	low
CGGA_1745	3.35616	0	1.58733	1.12145	1.99826	1.6636	1.98944	1.58995	-0.0756402	low
CGGA_1303	5.93973	0	1.91959	1.77308	2.38327	2.20009	2.16821	2.15563	-0.0731905	low
CGGA_1722	0.956164	1	1.689	1.28457	1.9084	2.07023	2.1465	1.85381	-0.0698482	low
CGGA_502	10.3589	0	1.88782	1.75743	2.77679	2.12986	2.44956	2.48094	-0.0641272	low
CGGA_715	9.39452	0	1.97794	1.9461	2.66083	2.08836	2.25265	1.93052	-0.0564851	low
CGGA_856	3.55342	0	1.59667	2.01688	2.49126	2.31201	2.48827	1.90352	-0.0445439	low
CGGA_1473	2.2274	0	1.78188	1.87373	2.86471	2.26462	2.68634	2.52474	-0.0437029	low
CGGA_D27	8.70685	0	1.8284	2.23831	2.76396	2.32971	2.48373	1.97781	-0.0420001	low
CGGA_898	4.55616	1	1.41352	1.9898	2.67833	2.00855	2.28662	2.24628	-0.0396622	low
CGGA_666	6.84658	1	1.52423	2.23741	2.77796	2.26688	2.57887	1.94212	-0.0324097	low
CGGA_1246	6.82466	0	1.85844	2.0432	2.57142	2.44059	2.54116	2.17519	-0.0317597	low
CGGA_235	6.41096	1	1.86977	1.79518	2.59827	2.15286	2.42227	2.18507	-0.0304696	low
CGGA_490	10.4219	0	1.64723	2.11842	2.60793	2.297	2.41937	2.16956	-0.0271564	low
CGGA_671	9.81918	0	2.05869	1.9092	2.6007	2.25793	2.40945	2.1106	-0.0257453	low
CGGA_1378	1.60274	1	1.53101	1.5658	2.31753	1.97542	2.28559	2.08837	-0.0231976	low
CGGA_843	9.26027	0	2.58865	2.32943	2.71962	2.6715	2.43498	2.21116	-0.0204742	low
CGGA_1137	6.90137	0	1.46959	1.82665	2.1211	1.92668	1.84016	1.92519	-0.0180496	low
CGGA_474	5.5589	0	1.84566	1.9296	2.47634	2.7385	2.74431	2.8279	-0.0170045	low
CGGA_1339	5.80822	0	2.08366	2.12353	2.64253	2.49633	2.43059	2.5269	-0.0142869	low
CGGA_1189	7.12877	0	2.19395	2.32943	2.70838	2.64648	2.57396	2.20711	-0.0133417	low
CGGA_276	1.44932	0	1.77635	2.14855	2.75128	2.189	2.30683	2.40136	-0.00846974	low
CGGA_1361	5.73151	0	1.94804	1.89775	2.65707	2.28081	2.47029	2.46537	-0.0084242	low
CGGA_543	10.2356	0	1.64723	1.95115	2.61538	1.99811	2.25874	2.08475	-0.00834725	low
CGGA_D28	2.35616	1	1.50007	1.94964	2.61345	2.40914	2.69064	2.60718	-0.00499944	low
CGGA_642	9.91233	0	1.48448	2.17885	2.67802	2.297	2.44183	2.48565	-0.00464116	low
CGGA_P172	2.2	0	1.56433	1.51193	2.29318	1.83477	2.13575	2.13013	-0.00192304	low
CGGA_675	9.80548	0	2.30007	2.12542	2.57642	2.48468	2.40755	2.14626	-0.00111915	low
CGGA_1463	4.46575	0	2.15233	2.01907	2.54937	2.43782	2.44078	2.26225	-0.000634936	low
CGGA_P111	2.66027	0	2.06915	2.23062	2.5337	2.68892	2.5163	2.47834	0.00169788	low
CGGA_1005	9.00274	0	1.8152	1.97725	2.69505	2.17327	2.40809	2.37072	0.00414465	low
CGGA_493	6.52603	1	1.82768	1.96763	2.80559	2.13922	2.44484	2.51685	0.00692132	low
CGGA_1447	0.843836	0	1.81682	1.56392	2.12515	1.84942	1.92493	1.85686	0.00851723	low
CGGA_1120	1.15616	1	1.9705	1.53265	2.12336	1.96559	2.00857	1.95286	0.00867635	low
CGGA_864	9.1863	0	1.53771	2.192	2.4503	2.31288	2.28233	2.24595	0.00869396	low
CGGA_1281	6.65479	0	1.81071	1.8644	2.57542	1.95053	2.3109	1.78399	0.011521	low
CGGA_635	9.94795	0	1.99297	1.8031	2.37048	2.24179	2.33396	2.1106	0.0117598	low
CGGA_P3	3.83288	0	2.34889	1.10248	2.01416	1.69806	1.91295	1.60699	0.0118328	low
CGGA_P116	0.835616	1	1.21949	1.38878	2.11469	1.92511	2.33048	2.18576	0.011999	low
CGGA_1429	5.4137	0	2.72403	2.10459	2.65178	2.61496	2.48823	2.26755	0.0122518	low
CGGA_807	9.35616	0	1.8255	1.85535	2.75958	1.88144	2.40972	1.85993	0.0154645	low
CGGA_494	10.4164	0	1.75815	1.98278	2.77586	1.96724	2.33041	2.19851	0.0170985	low
CGGA_884	3.09863	1	1.875	2.04112	2.67201	2.37624	2.48669	2.67256	0.018608	low
CGGA_1472	2.24384	0	1.68738	2.15088	2.84757	2.28986	2.64335	2.39521	0.0191657	low
CGGA_314	7.03562	1	1.9467	2.18598	2.57442	2.32971	2.27763	2.30214	0.0199777	low
CGGA_1205	2.54521	1	1.69384	2.26262	2.22315	2.33526	2.02544	2.018	0.020748	low
CGGA_D20	6.48493	1	1.78039	1.83148	2.75811	2.00075	2.43829	2.4212	0.0297091	low
CGGA_1003	8.45753	0	1.74657	2.0536	2.53002	2.16035	2.35728	1.97932	0.033249	low
CGGA_707	9.03836	1	2.08896	2.35419	2.51215	2.68323	2.43864	2.42443	0.033642	low
CGGA_323	11.0219	0	2.04508	1.9341	2.79444	1.95788	2.40564	1.89242	0.0339585	low
CGGA_890	8.16986	1	1.54463	2.30798	2.63795	2.58569	2.62544	2.73008	0.0363749	low
CGGA_243	8.15616	0	2.13552	2.20381	2.52673	2.32447	2.33556	1.79139	0.0376247	low
CGGA_D52	8.37534	0	1.76235	2.12193	2.47703	2.12316	2.26325	1.80943	0.0473397	low
CGGA_669	1.66301	1	1.73032	1.83781	2.7608	1.76549	2.29123	2.10733	0.0482457	low
CGGA_685	8.87397	1	2.015	2.192	2.71231	2.49911	2.5964	2.54231	0.048938	low
CGGA_638	6.53699	0	1.8092	2.27888	2.58214	2.2988	2.33138	2.13849	0.049727	low
CGGA_899	0.632877	1	1.18517	2.15075	2.61212	2.12891	2.34788	2.65244	0.049909	low
CGGA_1239	6.24658	0	1.76731	2.40819	2.64632	2.64784	2.64782	2.46107	0.0499358	low
CGGA_1630	3.85479	0	1.44263	2.30329	2.73704	2.29347	2.63503	2.13669	0.0505444	low
CGGA_283	9.50685	1	1.93612	2.22696	2.71453	2.31688	2.42646	2.3585	0.0517158	low
CGGA_565	9.87671	0	1.76485	2.16634	2.75872	2.09516	2.37035	2.25626	0.0624134	low
CGGA_659	2	0	1.99199	2.07851	2.89051	1.89092	2.34788	1.94948	0.0646242	low
CGGA_1767	0.846575	0	1.68738	1.39153	2.07185	1.9663	2.20326	2.28645	0.0650193	low
CGGA_P104	0.457534	1	1.5994	1.28115	2.15137	1.6606	2.17027	1.9218	0.0703369	low
CGGA_1542	0.50411	0	1.55129	1.52241	1.99564	1.72611	1.92493	1.80386	0.0776822	low
CGGA_1319	5.88767	0	1.3647	1.94819	2.78961	2.1473	2.79418	2.52853	0.0788274	low
CGGA_1059	0.0575342	1	1.98852	1.45062	2.52606	2.07603	2.6864	2.33847	0.0796472	low
CGGA_290	11.1644	0	2.08426	2.23962	2.53885	2.46817	2.46823	2.19754	0.0801205	low
CGGA_241	11.4055	0	1.94228	2.23516	2.7961	2.02559	2.25034	2.14881	0.0802149	low
CGGA_766	9.51233	0	2.15851	2.05211	2.4778	2.4228	2.49542	2.18154	0.080491	low
CGGA_1530	4.91233	0	1.18405	2.29266	2.86148	2.051	2.59779	2.23533	0.0806644	low
CGGA_757	2.86849	1	1.80083	2.03623	2.779	1.94002	2.2081	2.61375	0.081762	low
CGGA_1679	3.95068	0	1.45899	2.15088	2.81149	1.97194	2.58311	1.89256	0.0834275	low
CGGA_1418	0.786301	1	2.06977	1.54856	2.13874	2.07237	2.18231	2.17271	0.0841308	low
CGGA_752	9.55068	0	1.80693	2.14135	2.44512	2.44683	2.52578	2.28478	0.0843491	low
CGGA_1595	4.54521	0	1.60335	2.37852	2.88049	2.18888	2.75911	1.66916	0.0893811	low
CGGA_871	9.15068	0	2.00125	2.28293	2.72693	2.35479	2.52927	2.24018	0.0910752	low
CGGA_431	10.5918	0	2.1176	2.37893	2.85085	2.24354	2.56131	1.72895	0.0919498	low
CGGA_P392	1.19726	0	2.19181	2.16971	2.63141	2.32295	2.38841	2.29843	0.0921119	low
CGGA_479	10.4438	0	1.90514	2.20623	2.61842	2.17956	2.26175	2.33092	0.0938639	low
CGGA_1324	2.32329	1	1.72942	2.1125	2.7276	2.03111	2.39203	2.24696	0.0983436	low
CGGA_P122	2.66027	0	2.04025	2.02555	2.47908	2.44107	2.55832	2.40122	0.0999626	low
CGGA_761	5.0411	1	1.81445	2.08234	2.73762	2.52658	2.96309	2.53518	0.102332	low
CGGA_1486	0.50411	1	1.33117	1.66755	2.03876	1.87179	2.06544	2.09995	0.102439	low
CGGA_838	9.27671	0	2.17742	2.02987	2.61681	2.22747	2.51407	2.01152	0.10487	low
CGGA_300	6.02466	1	1.53504	1.93928	2.71273	1.90929	2.42463	2.40023	0.105884	low
CGGA_1488	5.15616	0	2.12076	2.13686	2.57399	2.44713	2.46569	2.61821	0.106072	low
CGGA_541	10.2493	0	1.97692	2.00203	2.79411	1.93466	2.47474	1.91293	0.10656	low
CGGA_P266	0.693151	1	1.67584	1.36618	1.99036	1.75964	2.06544	1.95676	0.106761	low
CGGA_1031	6.73151	1	1.77797	2.26774	2.59354	2.24771	2.29123	2.49419	0.108882	low
CGGA_P176	2.20274	0	2.23558	2.36951	2.58843	2.64173	2.52994	2.46584	0.110598	low
CGGA_1283	0.0547945	1	1.27841	2.24542	2.93131	2.07384	2.7418	2.32044	0.110626	low
CGGA_P422	1.17808	0	2.35806	2.15369	2.57104	2.44294	2.44614	2.34695	0.111566	low
CGGA_689	9.76164	0	2.22495	2.20429	2.7137	2.33836	2.59082	2.02749	0.112309	low
CGGA_1617	4.4137	0	1.53787	2.24024	2.74317	2.19039	2.67315	2.06684	0.112646	low
CGGA_905	8.69589	1	1.48595	2.15942	2.46909	2.24737	2.38089	2.52209	0.113885	low
CGGA_P17	3.29589	0	2.12022	2.28057	2.57484	2.59152	2.57076	2.52664	0.11511	low
CGGA_773	1.2137	1	1.92353	2.1915	2.70951	2.02928	2.32422	2.0314	0.117588	low
CGGA_901	2.54247	1	1.54013	2.40222	2.58154	2.51976	2.587	2.61588	0.117853	low
CGGA_560	10.1973	0	2.58144	2.14302	2.5943	2.51385	2.54136	2.22166	0.119165	low
CGGA_601	3.10411	1	1.9815	1.79632	2.70513	1.92296	2.45836	2.3065	0.127708	low
CGGA_252	0.452055	0	1.81371	2.15834	2.78419	2.19503	2.54076	2.56099	0.127759	low
CGGA_1190	7.12877	0	2.58955	2.11842	2.70556	2.39844	2.59152	2.1092	0.128325	low
CGGA_1571	1.12877	0	1.27251	2.36266	2.85098	2.15911	2.75567	2.13761	0.12914	low
CGGA_1413	5.50137	0	2.21239	2.19073	2.53645	2.43436	2.45872	2.35748	0.131792	low
CGGA_882	2.76164	0	2.13792	2.31066	2.71258	2.33694	2.43782	2.37207	0.13186	low
CGGA_909	9.44658	0	2.04073	2.24143	2.47321	2.48708	2.55406	2.16014	0.132574	low
CGGA_1440	5.3726	0	1.97451	2.40592	2.69018	2.47125	2.56966	2.38701	0.134599	low
CGGA_835	1.41644	0	1.71297	2.02053	2.50973	2.16558	2.55732	2.07124	0.134806	low
CGGA_1389	3.75342	1	1.51221	2.08005	2.74486	2.06862	2.69456	2.1521	0.135705	low
CGGA_1557	4.72055	0	1.98939	2.18533	2.77056	2.34195	2.73412	2.28761	0.136164	low
CGGA_P27	1.13151	0	2.12288	2.14845	2.51323	2.54127	2.5947	2.55403	0.1368	low
CGGA_1377	5.66575	0	1.86202	2.15169	2.61434	2.43885	2.6476	2.64768	0.136845	low
CGGA_J73	3.10685	1	2.11808	2.45916	2.76436	2.44763	2.58492	2.18895	0.137537	low
CGGA_337	2.76164	1	1.76235	2.18395	2.70697	1.84034	2.15574	2.11705	0.138042	low
CGGA_D40	8.45205	0	1.85911	2.27314	2.58913	2.23791	2.42227	2.12835	0.138425	low
CGGA_1219	5.80822	1	1.29954	2.01468	2.72946	2.17158	2.79647	2.6599	0.13971	low
CGGA_P183	2.21096	0	2.3866	2.31738	2.60846	2.55183	2.50439	2.38742	0.139826	low
CGGA_763	0.873973	0	2.04884	2.34761	2.66638	2.31351	2.3698	2.38027	0.139897	low
CGGA_812	9.34247	0	1.80618	2.18598	2.53232	2.19143	2.39819	2.15347	0.140278	low
CGGA_D58	0.49589	1	1.65779	1.98669	2.72518	1.75172	2.28769	2.19011	0.147734	low
CGGA_1020	3.06849	1	1.85232	2.16687	2.55161	2.37696	2.52948	2.5816	0.148088	low
CGGA_785	9.47123	0	1.57242	2.17936	2.42492	2.16902	2.33875	2.24729	0.149508	low
CGGA_1678	1.8	1	2.04225	1.90188	2.18093	2.10921	2.07977	2.17643	0.151124	low
CGGA_P164	2.4274	0	1.46696	1.90678	2.14971	2.17728	2.38523	2.16768	0.153359	low
CGGA_1335	5.33425	0	1.70958	2.20023	2.69946	2.18888	2.59333	2.27669	0.153426	low
CGGA_P29	0.282192	1	1.84454	1.85928	2.41623	1.99631	2.25941	2.36699	0.154384	low
CGGA_P13	3.31781	0	2.11592	2.32303	2.5501	2.54412	2.5913	2.32418	0.154807	low
CGGA_P178	2.12603	0	1.39918	1.49903	1.92794	1.61301	1.98449	1.69261	0.157749	low
CGGA_1482	5.1726	0	1.65355	2.13979	2.76867	2.02285	2.58888	2.14403	0.15802	low
CGGA_655	9.86301	0	2.15754	2.20332	2.49493	2.42029	2.47892	2.30853	0.160478	low
CGGA_267	3.76438	1	1.34149	2.22373	2.60201	2.20526	2.52722	2.63605	0.160903	low
CGGA_1132	6.93973	0	1.56647	2.12789	2.52788	2.02709	2.29392	2.38091	0.161354	low
CGGA_893	8.65753	1	1.68023	2.00951	2.84301	1.84225	2.47311	2.37873	0.163075	low
CGGA_1496	0.90411	1	2.35625	2.04487	2.52777	2.32545	2.49636	2.22096	0.164114	low
CGGA_1273	5.23836	0	1.65002	2.4298	2.68655	2.32244	2.59616	2.24908	0.166796	low
CGGA_1394	0.380822	1	1.26974	2.14023	2.72733	2.15597	2.71652	2.66762	0.167445	low
CGGA_1882	2.30685	0	1.35155	2.24718	2.81389	2.09998	2.72655	2.31398	0.167493	low
CGGA_1309	2.6411	0	1.34821	2.08451	2.77098	1.96488	2.73154	2.11115	0.168555	low
CGGA_1662	4.09041	0	1.50739	2.13048	2.61231	2.15452	2.67001	2.17808	0.169123	low
CGGA_P205	0.827397	1	1.63561	1.63034	2.03992	1.73124	2.02733	1.80732	0.172049	low
CGGA_704	7.04658	1	1.69107	2.01834	2.6516	2.14428	2.58032	2.61722	0.172171	low
CGGA_D24	2.29315	1	1.7321	2.13345	2.75328	1.95422	2.38492	2.41688	0.173027	low
CGGA_888	1.83288	1	2.07588	2.52308	2.60151	2.50395	2.44029	2.36543	0.173122	low
CGGA_1458	0.347945	1	2.11266	2.42639	2.6347	2.46474	2.55191	2.24545	0.175952	low
CGGA_1204	6.40548	0	2.35049	2.25804	2.67251	2.43454	2.57435	2.3661	0.176787	low
CGGA_446	10.5753	0	2.00029	2.11428	2.49395	2.30737	2.53977	2.24018	0.177766	low
CGGA_1667	4.04384	0	2.14644	2.21214	2.49986	2.42356	2.45532	2.48929	0.177905	low
CGGA_1417	5.48219	0	2.35857	2.10412	2.54654	2.3508	2.46674	2.37207	0.178043	low
CGGA_883	2.78356	0	1.7494	1.85466	2.65255	2.051	2.62673	2.56542	0.180964	low
CGGA_485	6.67671	0	1.97896	2.10348	2.35218	2.23255	2.30272	2.2523	0.181574	low
CGGA_1286	6.01096	0	1.65706	2.27461	2.72155	2.21306	2.63858	2.33824	0.183396	low
CGGA_1592	4.35068	1	2.41674	2.03761	2.59479	2.35784	2.60306	2.31211	0.183797	low
CGGA_251	3.5589	0	1.62874	2.23786	2.49346	2.14746	2.43981	2.07478	0.185684	low
CGGA_P131	2.54521	0	2.12076	2.26937	2.64339	2.39359	2.57544	2.41721	0.186457	low
CGGA_1386	5.63836	0	1.71724	2.23686	2.80564	2.03248	2.67487	1.87753	0.187184	low
CGGA_P399	1.1726	0	2.03621	2.3653	2.67162	2.45824	2.64132	2.41401	0.18817	low
CGGA_256	0.432877	0	1.92873	2.1491	2.66003	2.0809	2.40454	2.35493	0.189716	low
CGGA_P86	2.81096	0	2.3176	2.27406	2.51549	2.5473	2.5853	2.33726	0.191228	low
CGGA_747	2.65753	1	1.53638	2.64708	2.84561	2.27433	2.78601	1.72164	0.191342	low
CGGA_103	3.25479	1	2.15669	2.35187	2.62469	2.56673	2.60491	2.68681	0.191966	low
CGGA_1017	2.10411	1	2.19824	2.2265	2.61514	2.31221	2.48026	2.34599	0.192299	low
CGGA_261	11.3151	0	1.41352	2.18395	2.79042	1.83456	2.40618	2.38041	0.192343	low
CGGA_P174	2.23562	0	2.27419	2.32811	2.5695	2.49703	2.50607	2.45637	0.192865	low
CGGA_1450	2.62192	1	2.31508	2.30645	2.86844	2.1886	2.52289	2.21043	0.192964	low
CGGA_P20	3.27671	0	1.615	2.39098	2.6962	2.32892	2.58625	2.62759	0.19327	low
CGGA_698	5.07123	1	2.06573	2.1125	2.71231	2.15817	2.43087	2.6926	0.193589	low
CGGA_630	10.0493	0	2.02874	2.33835	2.71757	2.24667	2.51407	2.2412	0.194445	low
CGGA_903	3.9863	1	2.2386	2.08451	2.66356	2.33526	2.58138	2.66915	0.197452	low
CGGA_815	6.07945	1	1.96709	2.18345	2.63776	2.2118	2.43524	2.59517	0.197979	low
CGGA_P437	0.975342	0	2.78704	2.24629	2.63343	2.42193	2.37607	2.38261	0.199161	low
CGGA_P103	2.69315	0	2.17081	2.35271	2.56048	2.5314	2.59905	2.39196	0.199804	low
CGGA_28	3.02192	1	1.4876	2.07754	2.50509	1.84459	2.23009	2.26319	0.202005	low
CGGA_632	1.57808	1	1.37327	2.23606	2.64349	2.22601	2.68364	2.56475	0.202155	low
CGGA_1147	6.84384	0	1.4976	2.22999	2.5272	2.23526	2.52638	2.54093	0.202467	low
CGGA_1065	7.34795	0	2.26496	2.2047	2.67225	2.39438	2.66186	2.36182	0.2026	low
CGGA_P416	1.11781	0	2.24494	2.16856	2.56098	2.21235	2.43042	2.11014	0.204548	low
CGGA_1559	1.65205	1	1.63378	2.35377	2.77952	2.10535	2.59824	2.16513	0.20514	low
CGGA_1723	3.51233	0	1.80836	2.34632	2.69781	2.31091	2.65148	2.338	0.20527	low
CGGA_D48	0.605479	1	2.16268	2.1674	2.78703	1.9468	2.21644	2.54154	0.205964	low
CGGA_P156	2.25205	0	2.12182	2.2811	2.60871	2.42482	2.58804	2.46898	0.20672	low
CGGA_1087	1.92055	0	2.07161	1.96172	2.60151	2.12968	2.54876	2.38155	0.206761	low
CGGA_724	9.33151	0	1.58323	2.24297	2.62531	2.24018	2.67128	2.35725	0.208249	low
CGGA_P337	1.45753	0	2.28707	2.23562	2.68322	2.28903	2.46748	2.47038	0.208711	low
CGGA_1514	0.208219	1	1.89678	1.88935	2.08825	2.03778	2.066	2.196	0.210693	low
CGGA_P270	0.882192	1	1.7142	2.2757	2.63604	2.22452	2.45172	2.73336	0.21392	low
CGGA_P316	1.55342	0	1.33117	2.08253	2.92788	1.65302	2.60359	2.07915	0.214184	low
CGGA_633	4.96438	1	2.17711	2.05549	2.69035	2.11487	2.57377	2.206	0.21597	low
CGGA_1720	3.53425	0	1.85009	2.10551	2.48499	2.30485	2.52935	2.65209	0.21638	low
CGGA_1400	5.56986	0	1.99775	2.43205	2.99101	2.18659	2.76805	2.08784	0.218876	low
CGGA_P25	0.40274	1	1.79596	1.77194	2.16629	1.95404	2.21484	2.21113	0.221076	low
CGGA_1769	3.15342	0	2.179	2.01185	2.57475	2.11726	2.4237	2.41796	0.221587	low
CGGA_1340	3.03836	1	2.1338	2.01468	2.63827	2.10133	2.38147	2.7248	0.221606	low
CGGA_D61	11.2027	0	1.62652	2.02916	2.79232	1.91658	2.71855	2.15136	0.222544	low
CGGA_P115	2.6274	0	1.46432	1.73835	2.12245	1.83077	2.2417	2.03959	0.223512	low
CGGA_P93	2.76712	0	2.08426	2.29953	2.61976	2.44596	2.60261	2.64927	0.226759	low
CGGA_P128	2.51781	0	2.02523	2.40715	2.66527	2.34407	2.4957	2.51908	0.232082	low
CGGA_1362	5.73151	0	1.84566	2.27976	2.64346	2.27589	2.55556	2.59271	0.232559	low
CGGA_P16	1.22466	0	2.07222	2.4609	2.54358	2.54765	2.60908	2.37985	0.232893	low
CGGA_P147	2.36438	1	2.30957	2.33016	2.52401	2.52552	2.52662	2.53924	0.233343	low
CGGA_1771	2.92603	1	1.8286	2.42459	2.65666	2.34826	2.64154	2.31104	0.236284	low
CGGA_J130	6.86849	0	1.79072	2.0655	2.5606	1.87174	2.38406	1.97215	0.237049	low
CGGA_578	0.991781	1	1.69592	2.24099	2.70782	2.15552	2.56563	2.63136	0.237591	low
CGGA_625	5.74795	1	1.44815	2.41945	2.64094	2.30618	2.71228	2.39278	0.23905	low
CGGA_725	9.74795	0	1.3179	2.29171	2.40912	2.06778	2.32782	2.34978	0.239191	low
CGGA_1517	5.00274	0	2.02592	2.43555	2.79923	2.36318	2.72168	2.34742	0.2401	low
CGGA_1870	2.36712	0	1.21949	2.41354	2.59208	2.20192	2.67448	2.25845	0.24147	low
CGGA_P163	2.41096	0	2.23138	2.20161	2.63633	2.37528	2.64154	2.50287	0.242078	low
CGGA_P23	1.07397	1	1.78058	1.56013	2.05071	1.9023	2.35171	1.9851	0.242946	low
CGGA_1369	0.986301	0	1.74515	2.10644	2.77311	2.10341	2.76217	2.42896	0.243003	low
CGGA_1497	3.2274	1	1.62261	2.29471	2.63699	2.40417	2.75214	2.78815	0.243095	low
CGGA_P279	1.83014	0	1.73799	2.35356	2.61158	2.26852	2.63182	2.25202	0.24569	low
CGGA_1329	0.893151	1	1.30982	2.28894	2.65127	1.9615	2.33364	2.76209	0.246823	low
CGGA_333	4.88493	0	2.03766	2.29525	2.60498	2.22306	2.47753	2.29979	0.247152	low
CGGA_1528	4.91233	0	1.73216	2.41845	2.75758	2.31117	2.75018	2.38471	0.247913	low
CGGA_D50	2.14247	1	2.58711	2.32696	2.66976	2.48045	2.566	2.48666	0.249596	low
CGGA_634	7.2137	1	1.98085	2.32902	2.61778	2.28762	2.53379	2.41982	0.250555	low
CGGA_1041	7.84384	0	1.89874	2.28003	2.55217	2.3508	2.54524	2.65186	0.25105	low
CGGA_1269	6.06575	0	2.2802	2.36931	2.65178	2.32595	2.53644	2.20629	0.252882	low
CGGA_663	9.53151	0	2.12866	2.22103	2.57709	2.28281	2.51268	2.46537	0.253582	low
CGGA_1649	2.86849	0	1.68738	2.25134	2.85432	1.77603	2.50594	1.91751	0.254561	low
CGGA_1721	3.53425	0	1.5791	2.31356	2.78173	2.10873	2.75095	2.21077	0.255101	low
CGGA_1701	2.93699	0	1.64288	2.235	2.72408	2.11207	2.73814	2.21627	0.255517	low
CGGA_194	6.31233	1	1.80958	2.31951	2.69423	2.1975	2.60613	2.39114	0.257302	low
CGGA_1013	4.72603	1	1.54824	2.28253	2.72906	2.06443	2.5309	2.65432	0.261756	low
CGGA_607	3.80548	0	1.87889	2.16475	2.37951	2.25217	2.42724	2.46452	0.26178	low
CGGA_1155	3.76164	1	1.80097	2.33062	2.77517	2.1355	2.64433	2.31663	0.262417	low
CGGA_1524	3.3589	0	1.70803	2.19109	2.4807	2.2954	2.6889	2.3505	0.262439	low
CGGA_P421	0.843836	1	1.70803	2.33935	2.57056	2.28052	2.47569	2.77787	0.263213	low
CGGA_42	7.7589	1	1.98242	2.2531	2.59225	2.23559	2.51381	2.50134	0.26779	low
CGGA_1580	4.33151	1	2.07284	2.21678	2.64709	2.23427	2.52218	2.64157	0.268662	low
CGGA_700	0.465753	0	1.80006	2.28091	2.6218	2.2137	2.54294	2.60027	0.272309	low
CGGA_P439	0.846575	0	1.80836	2.34783	2.66976	2.25575	2.58387	2.60465	0.272697	low
CGGA_1262	0.454795	1	1.9093	2.18714	2.18579	2.18158	2.17271	2.26693	0.273232	low
CGGA_1562	4.71507	0	1.6674	2.399	2.58959	2.34617	2.69775	2.40359	0.273269	low
CGGA_1553	1.47945	1	1.94546	2.20127	2.67021	2.09101	2.49863	2.46741	0.273626	low
CGGA_1207	6.3863	0	1.69862	2.31904	2.697	2.10243	2.61106	2.27789	0.277561	low
CGGA_P177	2.12603	0	2.31435	2.15807	2.68988	2.23493	2.5402	2.65005	0.277961	low
CGGA_165	0.50137	0	1.11073	2.2118	2.8208	1.71959	2.64634	2.14448	0.278953	low
CGGA_503	10.3479	0	2.06104	2.40906	2.62715	2.29098	2.47884	2.46091	0.279092	low
CGGA_1675	2.68493	0	1.5934	2.33153	2.76154	2.2041	2.70467	2.70814	0.2802	low
CGGA_1552	4.73425	0	1.87153	2.32442	2.69929	2.18774	2.63448	2.33454	0.280851	low
CGGA_1594	1.31507	0	1.32769	2.08647	2.84072	1.50173	2.48781	1.93437	0.282206	low
CGGA_D56	0.175342	1	1.89656	2.42835	2.58875	2.25994	2.47264	2.42034	0.285266	low
CGGA_336	6.98356	1	1.89482	2.40976	2.70514	2.2498	2.64671	2.32341	0.286708	low
CGGA_P286	1.80274	0	1.73654	2.3709	2.57152	2.27473	2.64147	2.30535	0.28679	low
CGGA_1027	7.36438	0	2.05533	2.19449	2.70328	2.02373	2.55636	2.12296	0.287739	low
CGGA_720	3.44658	1	1.49263	1.95466	2.61011	2.01233	2.73407	2.61813	0.287759	low
CGGA_2006	1.4137	0	1.54463	2.44149	2.64568	2.18964	2.49716	2.67944	0.289365	low
CGGA_1181	0.871233	0	1.54908	2.13559	2.68994	2.04186	2.69727	2.53876	0.29045	low
CGGA_P150	0.956164	0	1.97928	2.23438	2.57475	2.36428	2.63103	2.78147	0.290603	low
CGGA_458	1.14795	1	1.82985	2.16316	2.61914	2.10891	2.54629	2.58037	0.291212	low
CGGA_1566	4.70137	0	1.66226	2.2757	2.7773	1.9897	2.73407	2.01669	0.293712	low
CGGA_1591	3.10411	1	2.43844	2.12832	2.56815	2.22452	2.49246	2.39073	0.295817	low
CGGA_1589	0.936986	1	2.09071	2.25631	2.5879	2.20843	2.54121	2.33578	0.297527	low
CGGA_236	1.93425	0	2.22333	2.46563	2.66654	2.36159	2.62448	2.2019	0.298776	low
CGGA_603	0.460274	0	1.92758	2.55968	2.80827	2.22601	2.50766	2.57089	0.298868	low
CGGA_591	4.53151	1	1.72581	1.93149	2.62038	1.85168	2.4851	2.6026	0.300846	low
CGGA_1384	0.523288	1	1.96341	2.30031	2.5696	2.1837	2.4498	2.49437	0.300989	low
CGGA_1525	4.61918	1	1.12108	2.16587	2.83946	1.55789	2.49529	2.25782	0.301087	low
CGGA_1714	3.64384	0	1.71113	2.37794	2.70161	2.1541	2.69703	2.201	0.301143	low
CGGA_P180	0.712329	1	1.70492	1.90597	2.31243	1.89382	2.37379	2.19405	0.30118	low
CGGA_1791	2.34247	1	1.7646	1.40238	2.22708	1.44764	2.20911	2.02191	0.302518	low
CGGA_1513	5.00548	0	1.77796	2.26826	2.67181	2.10438	2.71597	2.11513	0.306434	low
CGGA_759	3.46027	1	1.90756	2.29368	2.5899	2.23613	2.57231	2.52869	0.306703	low
CGGA_P142	2.4411	0	1.86202	2.33868	2.51215	2.26763	2.504	2.52448	0.306732	low
CGGA_1735	2.2274	1	2.324	2.17349	2.61239	2.18274	2.44839	2.57414	0.306813	low
CGGA_863	5.67945	1	2.33027	2.26149	2.67098	2.14944	2.37023	2.60783	0.307	low
CGGA_1686	0.964384	0	1.46432	2.21809	2.70014	1.98769	2.61914	2.56201	0.307902	low
CGGA_247	1.66849	1	1.67724	2.53819	2.78681	2.20758	2.86221	1.86312	0.310331	low
CGGA_1191	6.47945	0	2.21684	2.34911	2.74752	2.12604	2.55342	2.18052	0.313117	low
CGGA_P84	2.81096	0	2.02453	2.12659	2.58906	2.24374	2.63627	2.74384	0.316413	low
CGGA_1086	5.41644	1	1.78706	2.05036	2.23825	2.12283	2.37023	2.43129	0.318442	low
CGGA_861	2.44658	1	2.16003	2.44593	2.63254	2.27297	2.42457	2.58072	0.321656	low
CGGA_1645	4.20274	0	1.79596	2.22135	2.56454	2.24406	2.653	2.67169	0.32254	low
CGGA_1404	5.5589	0	1.58117	2.16587	2.61667	1.97473	2.64493	2.26036	0.322601	low
CGGA_1725	3.51233	0	1.93319	2.40993	2.58338	2.31143	2.62865	2.39783	0.327013	low
CGGA_P15	1.98082	1	1.33806	2.37871	2.65923	2.19303	2.78326	2.5651	0.327479	low
CGGA_P146	0.942466	0	2.06791	2.13559	2.58583	2.18352	2.57256	2.67277	0.327676	low
CGGA_P179	2.13151	0	2.06418	2.37483	2.62921	2.28081	2.54245	2.61768	0.328742	low
CGGA_1305	5.44932	0	1.69544	2.14353	2.74467	2.03543	2.77174	2.49715	0.329128	low
CGGA_1650	3.51507	1	2.24714	2.25016	2.63905	2.15787	2.43212	2.62725	0.330562	low
CGGA_652	1.30411	1	1.7947	2.10551	2.61587	2.03602	2.66703	2.38576	0.332079	low
CGGA_1103	1.60274	1	2.37633	2.04432	2.57342	2.24116	2.5995	2.6847	0.333679	low
CGGA_1164	2.8	1	1.59139	2.50468	2.63559	2.22178	2.61597	2.46584	0.335887	low
CGGA_1264	6.07397	0	2.08069	2.44334	2.67954	2.28847	2.60297	2.48754	0.339164	low
CGGA_1695	2.53973	0	1.64107	2.26517	2.71161	2.16487	2.79418	2.61152	0.340413	low
CGGA_P19	3.27945	0	2.09761	2.25833	2.59955	2.22349	2.5271	2.69654	0.340789	low
CGGA_P112	2.28493	1	2.05914	2.35481	2.61546	2.18429	2.50283	2.4516	0.340808	low
CGGA_1146	6.84384	0	1.48004	2.20235	2.57978	2.11339	2.70426	2.62515	0.341585	low
CGGA_889	8.80274	0	2.16988	2.13091	2.62577	1.96274	2.43465	2.34623	0.345119	low
CGGA_1140	2.52329	1	1.72581	2.01468	2.69709	1.69217	2.50745	2.21299	0.346451	low
CGGA_1131	6.93973	0	2.07222	2.3661	2.59497	2.36929	2.6799	2.57286	0.347299	low
CGGA_1095	7.61096	1	0.976189	2.15834	2.67124	1.82077	2.70779	2.5706	0.347932	low
CGGA_1407	5.52329	0	1.6775	2.26714	2.80842	1.85513	2.6517	2.1565	0.349111	low
CGGA_809	3.43014	1	1.73069	2.36851	2.67034	2.24694	2.69679	2.73201	0.35115	low
CGGA_P438	0.849315	0	2.25795	2.39756	2.68206	2.07764	2.34488	2.41495	0.352424	low
CGGA_1516	5.00274	0	1.7494	2.41945	2.6413	2.18544	2.63957	2.42093	0.353333	low
CGGA_1640	4.28219	0	1.39918	2.34611	2.7963	1.89893	2.7035	2.29647	0.356187	low
CGGA_D59	7.61096	0	1.81221	2.19	2.62269	1.92768	2.41403	2.5974	0.356704	low
CGGA_804	1.68219	0	2.06367	2.22834	2.79566	1.80239	2.31594	2.55035	0.357918	low
CGGA_1536	2.30137	1	2.04291	2.29878	2.50497	2.34053	2.56395	2.79312	0.359639	low
CGGA_P314	1.56712	0	2.12182	2.26798	2.68941	2.0289	2.7399	1.71338	0.361214	low
CGGA_139	1.90137	1	2.20911	2.23562	2.62196	2.12283	2.53483	2.42149	0.36322	low
CGGA_P173	2.14247	0	2.17081	2.30179	2.53303	2.33574	2.55567	2.76478	0.366757	low
CGGA_482	6.87945	1	2.37291	2.34804	2.69423	2.2392	2.5773	2.50065	0.36986	low
CGGA_P338	1.45753	0	2.18789	2.36651	2.66349	2.06538	2.37044	2.51594	0.371832	low
CGGA_1121	7.0137	0	1.73508	2.10459	2.65882	2.00086	2.70594	2.57885	0.37212	low
CGGA_1169	4.83562	1	1.83892	2.34761	2.64914	2.11207	2.55471	2.60324	0.372374	low
CGGA_705	4.12877	1	1.56433	2.28772	2.65605	2.11254	2.65871	2.83227	0.372946	low
CGGA_1412	0.810959	1	2.191	2.39118	2.75203	2.0565	2.4766	2.40272	0.373367	low
CGGA_1401	4.60274	1	1.85119	2.32627	2.63141	2.12191	2.57226	2.58593	0.373777	low
CGGA_1060	0.621918	1	2.25849	2.39149	2.86555	1.91254	2.34002	2.52709	0.373939	low
CGGA_1018	6.92329	1	2.27788	2.42607	2.5217	2.3355	2.59977	2.18496	0.375428	low
CGGA_1503	1.89589	0	1.58117	1.87373	2.07706	1.70626	2.11796	2.1215	0.376557	low
CGGA_457	0.205479	1	1.51698	2.35565	2.70497	2.1386	2.6786	2.9308	0.37829	low
CGGA_P298	1.73699	0	1.55129	2.3313	2.64617	2.00601	2.65351	2.34671	0.378933	low
CGGA_1158	6.76986	0	2.23634	2.25515	2.55134	2.16771	2.51293	2.432	0.379437	low
CGGA_P113	2.8274	0	2.266	2.22426	2.66521	2.04128	2.51667	2.36295	0.380542	low
CGGA_420	9.6274	0	2.69245	2.3972	2.75678	2.33862	2.66235	2.37685	0.381143	low
CGGA_799	5.11781	1	2.13691	2.41541	2.78141	2.12559	2.70461	2.15781	0.381208	low
CGGA_D34	0.40274	1	1.57982	2.05279	2.65794	1.87618	2.70557	2.48923	0.381288	low
CGGA_1854	2.5589	0	1.47997	2.26965	2.69481	2.00216	2.69504	2.65084	0.383788	low
CGGA_1066	1.98082	1	1.80836	2.38726	2.57803	2.14428	2.52084	2.60153	0.386524	low
CGGA_D63	0.580822	1	2.13138	2.19942	2.9218	1.76999	2.50981	2.44632	0.387388	low
CGGA_1116	0.679452	1	1.82912	2.26396	2.70442	2.03955	2.65846	2.54734	0.388861	low
CGGA_1651	2.30685	1	1.6691	2.2819	2.72965	1.91224	2.6426	2.34093	0.3893	low
CGGA_J024	7.67397	0	1.66091	1.65698	2.36786	1.67603	2.4249	2.64069	0.390516	low
CGGA_1236	0.523288	1	2.03756	2.31018	2.68923	1.98769	2.43665	2.55968	0.390555	low
CGGA_738	9.59178	0	2.14132	2.24321	2.70838	2.19424	2.70635	2.69921	0.391281	low
CGGA_D46	0.821918	1	2.18652	2.17936	2.50478	2.27272	2.63936	2.66496	0.39288	low
CGGA_1162	6.73151	0	1.27638	2.15048	2.77944	1.4953	2.48026	2.24479	0.393218	low
CGGA_1671	4.01096	0	1.46959	2.19144	2.63604	2.05381	2.77043	2.72555	0.393306	low
CGGA_808	3.19726	0	2.03545	2.08991	2.65242	1.84793	2.45715	2.48185	0.39362	low
CGGA_P155	2.23836	0	1.90358	2.30552	2.41521	2.21517	2.48823	2.59084	0.393634	low
CGGA_1409	6.16164	0	1.8092	2.15565	2.76841	1.88057	2.68433	2.45209	0.398044	low
CGGA_1481	0.358904	1	1.73363	1.55438	1.93188	1.53465	2.07652	1.94333	0.398351	low
CGGA_730	5.80274	1	1.87568	2.33557	2.54453	2.11016	2.50658	2.5396	0.399453	low
CGGA_1345	5.78904	0	1.71876	2.18533	2.59627	1.9155	2.61906	2.26162	0.400304	low
CGGA_1454	5.33151	0	1.88486	2.24718	2.73578	1.8027	2.51901	2.19985	0.401561	low
CGGA_1618	4.42466	0	1.27638	2.26798	2.64043	1.90896	2.68074	2.52372	0.402487	low
CGGA_400	3.61918	1	1.66402	2.11428	2.68469	1.87174	2.59675	2.72203	0.40427	low
CGGA_P136	0.843836	0	1.53559	1.699	1.9698	1.67101	2.20289	2.10508	0.405666	low
CGGA_1718	2.28767	0	1.63194	2.35523	2.69101	2.0697	2.68859	2.61651	0.405776	low
CGGA_818	9.32055	0	2.05152	2.06219	2.64815	2.01431	2.70374	2.53345	0.407465	low
CGGA_D33	0.479452	1	1.88337	2.32289	2.7625	1.96438	2.60548	2.4769	0.407592	low
CGGA_1642	4.27945	0	0.948934	2.46886	2.77115	1.85889	2.74485	2.45751	0.409725	low
CGGA_1251	0.745205	1	1.39812	1.99976	2.64382	1.74822	2.69831	2.51403	0.410877	low
CGGA_1127	6.97808	0	1.56219	2.29827	2.73791	1.86631	2.69026	2.26879	0.411391	low
CGGA_1527	4.69589	1	1.62261	2.36871	2.65828	2.06157	2.62585	2.66444	0.41141	low
CGGA_1421	5.44384	0	1.76051	2.11867	2.8557	1.65759	2.64745	2.23085	0.411477	low
CGGA_1615	1.60548	1	1.21085	1.93415	2.87816	0.974718	2.29556	1.89895	0.412124	low
CGGA_1037	2.13699	0	1.67248	2.36509	2.85276	1.64685	2.46926	2.1268	0.41346	low
CGGA_2024	0.89863	1	2.07038	2.03761	2.68395	1.69806	2.42492	2.32623	0.414262	low
CGGA_1664	4.08493	0	1.68411	2.36731	2.68334	1.99761	2.64922	2.39703	0.41656	low
CGGA_777	0.4	1	2.07588	2.44071	2.48816	2.36251	2.58634	2.65092	0.416579	low
CGGA_1321	1.92329	1	1.39308	2.41609	2.62	2.16446	2.73758	2.79691	0.417555	low
CGGA_P18	1.06027	1	2.07709	2.31404	2.61207	2.21235	2.61089	2.76459	0.418202	low
CGGA_1406	5.90137	1	1.72672	2.36365	2.64963	2.05535	2.60139	2.61237	0.418865	low
CGGA_1211	6.36712	0	2.20456	2.30104	2.50852	2.14471	2.5094	2.3625	0.420475	low
CGGA_D47	2.87123	1	2.42385	2.47721	2.63793	2.22527	2.52309	2.30008	0.422008	low
CGGA_1420	0.99726	1	1.32419	2.37326	2.77872	1.80911	2.71741	2.25845	0.423689	low
CGGA_D38	1.88767	1	1.50189	2.33587	2.46019	2.04253	2.64918	2.20526	0.42397	low
CGGA_D21	3.30959	1	1.52149	2.28333	2.59562	1.90929	2.53536	2.57844	0.42479	low
CGGA_J042	3.86027	1	1.61866	2.39975	2.74073	1.9308	2.55367	2.6393	0.425939	low
CGGA_P185	1.37534	1	2.04025	2.3709	2.5143	2.26823	2.60882	2.60765	0.426815	low
CGGA_1235	6.26575	0	1.81801	2.54404	2.64482	2.13639	2.55331	2.48327	0.42767	low
CGGA_499	0.334247	1	1.71017	2.32436	2.50596	2.35095	2.84951	2.75215	0.428933	low
CGGA_1380	0.79726	1	1.83092	2.54836	2.55878	2.22588	2.53356	2.58491	0.429576	low
CGGA_1770	0.816438	1	1.6588	2.30428	2.62196	2.11726	2.73611	2.69126	0.431202	low
CGGA_1160	1.16712	1	2.01963	2.07658	2.5977	1.86906	2.45325	2.66517	0.431418	low
CGGA_1737	3.41918	0	1.77664	2.39301	2.67997	2.03837	2.69449	2.31531	0.431738	low
CGGA_1689	3.87397	0	1.4536	2.33935	2.54979	2.07554	2.6447	2.72642	0.433351	low
CGGA_1356	2.59726	1	1.81682	2.27434	2.62777	1.92352	2.5546	2.39642	0.433395	low
CGGA_1212	6.27945	1	2.3988	2.24267	2.58319	2.2619	2.62406	2.71927	0.434392	low
CGGA_1136	0.646575	1	2.07144	2.21907	2.63708	1.90353	2.39484	2.65794	0.436033	low
CGGA_J50	4.63836	1	1.8251	2.58843	2.73578	2.21866	2.69217	2.61723	0.437825	low
CGGA_1670	3.12603	0	1.70336	2.49029	2.66782	2.05157	2.5354	2.65788	0.44285	low
CGGA_288	2.89589	1	1.82393	2.37483	2.68059	1.89211	2.47482	2.44111	0.443014	low
CGGA_1829	2.19452	0	1.89087	2.33802	2.60555	1.94887	2.47409	2.44025	0.443432	low
CGGA_P144	2.44384	0	2.19007	2.37307	2.62608	2.21552	2.60613	2.67846	0.443489	low
CGGA_D44	0.857534	1	2.21258	2.49701	2.7296	2.12557	2.45251	2.73869	0.444094	low
CGGA_1655	3.31233	0	1.50007	2.26993	2.73835	1.88778	2.7336	2.57466	0.446049	low
CGGA_P310	0.613699	1	1.43706	2.10319	2.87829	1.28555	2.53781	1.84453	0.446731	low
CGGA_374	1.35068	1	1.92987	2.34707	2.80322	1.83066	2.45128	2.63965	0.447729	low
CGGA_1863	2.47123	0	1.76324	2.35335	2.69024	1.92273	2.66669	2.22488	0.451102	low
CGGA_1786	3.09041	0	2.15282	2.3228	2.68798	2.01296	2.63627	2.25813	0.451619	low
CGGA_1119	1.15616	1	1.3604	2.34776	2.48682	2.22747	2.87117	2.65421	0.45197	low
CGGA_P335	1.47123	0	1.7536	2.22394	2.65046	1.92747	2.77853	2.17561	0.45261	low
CGGA_1673	3.99178	0	1.8251	2.3265	2.63846	2.01794	2.62761	2.53936	0.453493	low
CGGA_157	2.50411	1	1.50252	2.31236	2.68774	1.91712	2.73211	2.45408	0.453952	low
CGGA_1175	1.20822	1	1.59548	2.21198	2.6516	1.88057	2.60581	2.72141	0.454448	low
CGGA_1422	0.558904	1	1.65355	1.87195	1.75833	1.95841	2.24973	2.04448	0.455265	low
CGGA_1510	1.27397	1	1.71266	2.52977	2.79214	2.03602	2.64907	2.625	0.455268	low
CGGA_1902	2.16438	0	1.4454	2.36327	2.62523	1.93448	2.65379	2.48014	0.455598	low
CGGA_1696	3.30137	0	1.39918	1.6478	1.9576	1.51642	2.25383	1.92939	0.456041	low
CGGA_1560	1.25753	1	2.01677	2.33039	2.75138	2.02589	2.59516	2.79194	0.456281	low
CGGA_1504	5.07945	0	1.32419	2.34911	2.69487	1.91224	2.75095	2.542	0.457866	low
CGGA_521	1.40822	1	2.22634	2.2803	2.61239	2.10243	2.53598	2.70183	0.458623	low
CGGA_1568	0.945205	0	1.228	2.36489	2.76552	1.84265	2.77878	2.51435	0.460487	low
CGGA_320	8.23288	1	2.10605	2.25222	2.59972	1.94061	2.49408	2.41401	0.462168	low
CGGA_369	10.8411	0	1.77532	2.2047	2.6611	1.7918	2.58464	2.32546	0.462326	low
CGGA_1033	3.62192	0	1.73069	2.28798	2.79697	1.7512	2.70397	2.1171	0.466182	low
CGGA_491	2.94247	1	1.89718	2.1809	2.60089	1.96006	2.59761	2.68385	0.468922	low
CGGA_P280	1.84932	0	1.78706	2.19919	2.62314	1.77373	2.54435	2.29647	0.470388	low
CGGA_P145	0.843836	1	1.85338	2.4075	2.65584	1.98635	2.53747	2.57403	0.47138	low
CGGA_2002	1.43562	0	2.04158	2.32303	2.70447	1.88516	2.46539	2.55494	0.471437	low
CGGA_862	2.86575	0	1.87568	2.44133	2.72005	1.94438	2.59452	2.35748	0.474336	low
CGGA_1702	0.460274	1	2.46806	2.07299	2.51119	2.17531	2.60508	2.82219	0.474342	low
CGGA_1437	2.8411	1	1.9506	2.2677	2.68528	1.81228	2.54656	2.27063	0.474476	low
CGGA_1850	2.05479	0	1.84677	2.27706	2.61538	1.9768	2.59959	2.61902	0.474908	low
CGGA_580	3.81918	1	1.76485	2.33587	2.71976	1.85908	2.5805	2.50047	0.474925	low
CGGA_P137	2.35616	0	2.01462	2.27434	2.56306	2.11773	2.63214	2.6968	0.47517	low
CGGA_1739	1.41096	1	1.84566	2.50468	2.62453	2.09949	2.63182	2.40378	0.475896	low
CGGA_P306	1.62192	0	1.78188	2.36347	2.53513	2.01794	2.61698	2.31951	0.476106	low
CGGA_1055	4.4137	1	1.81562	2.25427	2.48379	2.09252	2.67055	2.55288	0.477853	high
CGGA_1740	0.994521	1	1.59741	2.48026	2.68702	1.98297	2.59296	2.65865	0.479292	high
CGGA_1383	2.42192	0	2.01247	2.34067	2.75696	1.98567	2.77683	2.25557	0.479424	high
CGGA_791	0.690411	1	2.01871	2.27479	2.59468	2.05189	2.5983	2.66378	0.479607	high
CGGA_1398	1.51781	1	1.84566	2.47372	2.59566	2.24018	2.71559	2.72375	0.482129	high
CGGA_1523	4.94247	0	1.86309	2.47165	2.57257	2.14123	2.57711	2.65826	0.483075	high
CGGA_P315	1.23562	1	1.47997	2.35208	2.68708	1.91224	2.75994	2.4447	0.484419	high
CGGA_1010	0.673973	1	1.67248	1.61382	2.2024	1.3236	2.23211	1.97046	0.485397	high
CGGA_P108	2.67397	0	2.25901	2.41744	2.47358	2.23986	2.54076	2.51921	0.488806	high
CGGA_887	2.76986	0	1.7508	2.43822	2.75558	1.78512	2.4977	2.38701	0.489246	high
CGGA_2013	0.380822	1	1.68411	2.02788	2.57456	1.36752	2.13438	2.46835	0.489504	high
CGGA_1620	3.90959	0	1.65531	2.41912	2.70026	1.88428	2.62969	2.38197	0.489572	high
CGGA_1703	3.74247	0	1.42571	2.35502	2.71025	1.8834	2.72168	2.60746	0.490285	high
CGGA_1607	3.65205	1	1.69062	2.54856	2.68255	2.01856	2.61353	2.48681	0.490957	high
CGGA_1648	4.16712	0	1.39614	2.2249	2.69463	1.40532	2.44727	1.93189	0.491233	high
CGGA_P121	2.57808	0	1.77927	2.12962	2.76427	1.56725	2.61302	2.09263	0.491274	high
CGGA_1161	6.74795	0	1.62636	2.31476	2.77968	1.76321	2.66676	2.40515	0.491371	high
CGGA_1188	0.70137	1	1.31185	2.51851	2.70371	2.10337	2.83331	2.79587	0.491447	high
CGGA_1544	0.569863	1	1.63194	2.20979	2.68792	1.89382	2.72618	2.71909	0.491806	high
CGGA_1621	4.40274	0	1.51221	2.34503	2.627	1.96984	2.71318	2.64149	0.495101	high
CGGA_1588	4.6	0	1.0142	2.45241	2.83325	1.57822	2.68164	2.23119	0.496594	high
CGGA_1605	0.879452	1	1.60335	2.33802	2.69248	1.77025	2.61003	2.31077	0.497089	high
CGGA_721	6.99178	1	2.14694	2.24718	2.61842	1.99696	2.58558	2.58984	0.49756	high
CGGA_1431	5.41096	0	1.76188	2.36103	2.69236	2.01917	2.76286	2.56976	0.498701	high
CGGA_1471	5.25753	0	1.76865	2.36509	2.64745	2.0283	2.6852	2.66129	0.498869	high
CGGA_1700	3.7589	0	1.54463	2.50834	2.68965	1.9555	2.69008	2.39763	0.500613	high
CGGA_1606	1.29041	1	2.51902	2.02672	2.5359	2.04244	2.60977	2.60105	0.500659	high
CGGA_1776	0.709589	1	1.85988	2.58025	2.66064	2.08695	2.57964	2.53936	0.50184	high
CGGA_545	1.52055	1	1.91176	2.39701	2.63759	2.13222	2.74452	2.62029	0.503627	high
CGGA_1704	3.72603	0	1.4052	2.26574	2.71041	1.85228	2.82502	2.55093	0.504874	high
CGGA_1156	6.7863	0	1.98476	2.3814	2.72428	2.03069	2.70315	2.5935	0.505132	high
CGGA_495	0.808219	1	2.10182	2.58482	2.72464	2.03716	2.4301	2.6931	0.505755	high
CGGA_1192	6.47397	0	1.9506	2.53597	2.61874	2.1665	2.62268	2.6183	0.505939	high
CGGA_1052	8.12055	0	1.80313	2.18141	2.44293	1.74586	2.46509	2.07175	0.506012	high
CGGA_P411	1.12603	0	2.13074	2.34023	2.63254	1.94061	2.40269	2.75801	0.507501	high
CGGA_406	0.246575	1	1.86838	2.2663	2.45552	2.01296	2.48643	2.78023	0.512724	high
CGGA_1126	2.14795	1	2.01029	2.32092	2.6734	2.00918	2.63362	2.72369	0.512795	high
CGGA_1477	3.27123	1	1.39001	2.32419	2.67213	1.76557	2.63253	2.55698	0.514394	high
CGGA_1583	4.4	1	1.82976	2.44287	2.66619	1.9106	2.6108	2.29759	0.515851	high
CGGA_1743	3.37534	0	1.81079	2.27543	2.68917	1.77946	2.57623	2.47193	0.518847	high
CGGA_564	1.86027	1	2.24976	2.11606	2.73514	1.86906	2.68406	2.56114	0.519707	high
CGGA_1610	2.89863	1	1.15588	2.49504	2.81616	1.4777	2.50761	2.13483	0.520417	high
CGGA_1669	0.380822	1	2.0623	2.57483	2.57352	2.30671	2.65878	2.74065	0.520602	high
CGGA_1113	3.46575	1	2.44621	2.46716	2.66528	2.07548	2.53475	2.34874	0.521488	high
CGGA_1780	3.07671	0	1.70803	1.66607	2.04621	1.45475	2.19239	2.09631	0.521712	high
CGGA_D51	0.369863	1	1.94725	2.44055	2.63469	1.92611	2.48259	2.51931	0.522796	high
CGGA_P98	0.868493	1	1.74515	2.32604	2.69706	1.75605	2.61336	2.26817	0.522804	high
CGGA_1539	4.81644	0	2.00591	2.34438	2.62838	2.02769	2.61806	2.69152	0.522828	high
CGGA_1232	5.66301	1	1.97611	2.54521	2.64921	2.14514	2.63634	2.64998	0.525535	high
CGGA_1129	0.460274	1	1.21234	2.56027	2.86319	1.93389	2.8458	2.83473	0.526869	high
CGGA_789	0.945205	1	1.22899	2.49701	2.58116	1.87263	2.62913	2.47505	0.527378	high
CGGA_1728	2.51233	1	1.71113	2.48426	2.56979	1.985	2.51117	2.65643	0.5294	high
CGGA_2003	1.41644	0	1.87048	2.19216	2.64667	1.59769	2.38342	2.42093	0.531158	high
CGGA_1579	4.14247	0	1.47481	2.36751	2.88896	1.50808	2.67873	2.02577	0.531738	high
CGGA_1611	3.1726	1	1.83322	2.43743	2.52675	2.31377	2.87609	2.72555	0.532402	high
CGGA_1764	1.94521	1	1.71572	2.47565	2.66369	2.05213	2.7413	2.59701	0.532871	high
CGGA_265	10.8466	0	1.79972	2.41405	2.63463	2.03188	2.70588	2.60067	0.533859	high
CGGA_1301	0.654795	1	1.94505	2.32581	2.64616	1.76999	2.46246	2.41405	0.535618	high
CGGA_1426	0.40274	1	1.66569	2.35208	2.57522	1.93756	2.60332	2.6979	0.537574	high
CGGA_1078	0.863014	1	2.09233	2.29447	2.33698	1.93389	2.3196	2.37535	0.538742	high
CGGA_1627	4.37534	0	1.76865	2.35481	2.64231	1.94813	2.69966	2.57833	0.542967	high
CGGA_P265	2.00822	0	1.13626	1.90434	2.00725	1.24805	1.97511	1.96746	0.543228	high
CGGA_P385	1.23014	0	1.82744	2.37852	2.54036	1.93371	2.58925	2.38049	0.543809	high
CGGA_1643	0.465753	0	1.51698	2.65804	2.61304	2.0407	2.57356	2.67356	0.544843	high
CGGA_1430	0.482192	1	1.78706	2.43396	2.57295	2.05325	2.57642	2.87197	0.545016	high
CGGA_904	2.12055	1	2.37611	2.432	2.6689	2.17956	2.73084	2.51849	0.546229	high
CGGA_1731	2.66301	0	1.97849	2.35039	2.70178	1.85795	2.59241	2.52778	0.549904	high
CGGA_599	1.14521	1	2.02467	2.28534	2.56039	1.90353	2.53877	2.52517	0.550306	high
CGGA_D19	0.813699	1	2.41886	2.26993	2.49999	2.11064	2.61831	2.45408	0.550321	high
CGGA_P5	1.03562	1	2.01748	2.47837	2.59877	2.15283	2.64026	2.81879	0.557465	high
CGGA_1330	6.48219	0	0.905094	2.24674	2.4203	1.53596	2.41377	2.55155	0.558004	high
CGGA_358	0.334247	1	1.43706	2.2677	2.65916	1.61801	2.60111	2.40319	0.560016	high
CGGA_1118	1.09041	1	1.61866	2.48579	2.68768	2.00009	2.82436	2.49349	0.561397	high
CGGA_1604	2.0274	1	1.06165	2.68406	2.80191	1.82163	2.69486	2.68319	0.561888	high
CGGA_1809	0.939726	1	2.37609	2.3349	2.69712	1.87719	2.40975	2.72866	0.562034	high
CGGA_1094	0.690411	1	2.35658	2.38179	2.74775	2.12074	2.72256	2.82693	0.563328	high
CGGA_1575	0.353425	1	1.46959	2.42818	2.63148	1.94738	2.72761	2.7407	0.564024	high
CGGA_710	1.80822	1	1.8763	2.19844	2.57383	1.67876	2.45836	2.44712	0.564728	high
CGGA_P132	2.56438	0	2.05595	2.37444	2.52901	2.02163	2.57681	2.56564	0.565448	high
CGGA_P109	1.11233	1	1.41702	2.49223	2.57085	2.13238	2.83999	2.8282	0.566321	high
CGGA_1435	0.887671	0	2.10937	2.43332	2.7283	1.95696	2.62038	2.62543	0.568679	high
CGGA_1567	2.30137	1	1.76051	2.44025	2.76854	1.85701	2.73667	2.47208	0.572024	high
CGGA_678	1.05753	1	1.92758	2.59216	2.63979	2.06218	2.5983	2.60974	0.57267	high
CGGA_1587	2.05479	1	1.90835	2.57858	2.57766	2.16241	2.63619	2.74303	0.572775	high
CGGA_1693	1.41644	1	1.29529	2.47496	2.7294	1.78173	2.77309	2.43378	0.572778	high
CGGA_1840	2.6411	0	1.72327	2.307	2.58808	1.83477	2.62641	2.54152	0.573268	high
CGGA_1148	1.63288	1	1.73799	2.38254	2.50546	2.01171	2.6604	2.62421	0.573315	high
CGGA_2008	0.120548	1	1.91308	2.37987	2.73825	1.60796	2.35238	2.50982	0.573443	high
CGGA_619	1.50685	1	1.71724	2.38482	2.63544	1.95841	2.7152	2.70342	0.573714	high
CGGA_780	2.52877	1	1.91214	2.45916	2.64094	1.94288	2.60403	2.54284	0.574732	high
CGGA_112	4.20274	1	1.88486	2.42029	2.68965	1.91469	2.65184	2.60067	0.575551	high
CGGA_P110	2.19178	1	2.12447	2.50381	2.69411	2.03602	2.65278	2.55754	0.576792	high
CGGA_1108	2.38356	1	2.22595	2.53804	2.57905	2.25822	2.65112	2.81522	0.576832	high
CGGA_1608	4.46301	0	1.65355	2.47207	2.64202	1.91387	2.67507	2.52753	0.577058	high
CGGA_P401	1.48767	0	1.54463	2.47918	2.49337	1.96843	2.5774	2.64966	0.577529	high
CGGA_P151	2.50685	0	1.60727	2.34783	2.66343	1.77488	2.65155	2.54497	0.578874	high
CGGA_1747	0.80274	1	1.46696	2.30254	2.74853	1.73252	2.78806	2.56619	0.579058	high
CGGA_1680	1.63288	1	1.49263	2.56297	2.68181	2.02649	2.79152	2.71814	0.581213	high
CGGA_492	1.7863	0	1.80958	2.48439	2.70987	1.91306	2.61631	2.72269	0.584217	high
CGGA_P99	1.86027	0	1.87153	2.39556	2.70812	1.81122	2.62697	2.47408	0.584394	high
CGGA_1307	6.54795	0	1.64723	2.22047	2.51324	1.9002	2.74908	2.60504	0.586176	high
CGGA_1072	2.9863	1	2.35918	2.33087	2.65356	2.1222	2.72986	2.78326	0.587325	high
CGGA_1030	8.03836	0	1.87361	2.37968	2.59102	1.91142	2.66744	2.42498	0.587802	high
CGGA_1908	0.816438	1	1.86202	2.40097	2.61215	1.8763	2.51493	2.74566	0.588077	high
CGGA_135	5.27123	1	2.14196	2.60083	2.44953	2.32644	2.61964	2.74597	0.588825	high
CGGA_846	8.19452	0	1.90358	2.31643	2.70088	1.76557	2.61765	2.50968	0.589117	high
CGGA_P30	1.10685	1	2.15233	2.63589	2.55442	2.40686	2.7529	2.90088	0.589416	high
CGGA_1228	6.29041	0	2.07345	2.52921	2.65639	2.0204	2.64907	2.46042	0.590801	high
CGGA_1785	0.90137	1	1.72327	2.44133	2.74978	1.9613	2.86285	2.60229	0.591892	high
CGGA_694	3.27123	1	1.91769	2.22696	2.63827	1.56423	2.39903	2.44045	0.596869	high
CGGA_1534	0.112329	1	1.74799	2.38425	2.78125	1.78958	2.75897	2.50561	0.597241	high
CGGA_1641	0.79726	1	1.30632	2.42327	2.70206	1.79069	2.77996	2.6316	0.598292	high
CGGA_1716	3.64932	0	2.02383	2.38969	2.52458	2.09949	2.66504	2.77662	0.598327	high
CGGA_1727	3.49589	0	1.45088	2.3228	2.64829	1.79729	2.77572	2.59885	0.598507	high
CGGA_825	2.29041	1	1.83892	2.4054	2.67492	1.83576	2.56062	2.74303	0.599345	high
CGGA_850	1.54521	0	1.71852	2.38368	2.29731	2.06889	2.56451	2.62647	0.601573	high
CGGA_1403	1.86027	1	2.56176	2.30847	2.64339	2.01484	2.57046	2.70068	0.60302	high
CGGA_1183	1.11781	1	2.03553	2.59955	2.66749	1.97473	2.4814	2.72281	0.604038	high
CGGA_1178	1.15616	1	2.08954	2.36951	2.6605	1.91387	2.61864	2.65115	0.604344	high
CGGA_1170	0.947945	1	1.74791	2.42723	2.72397	1.8875	2.73918	2.67826	0.605945	high
CGGA_1184	0.427397	1	1.70958	2.34351	2.60496	1.78399	2.66061	2.41533	0.607211	high
CGGA_1501	0.608219	1	1.72177	2.33846	2.76393	1.62295	2.6808	2.26351	0.608258	high
CGGA_1058	2.72603	1	2.15572	2.20878	2.51655	1.77718	2.41285	2.64649	0.609303	high
CGGA_1154	1.04932	1	2.22043	2.439	2.58529	2.07554	2.58568	2.7922	0.609354	high
CGGA_P106	0.194521	1	1.9777	2.63034	2.67353	2.06862	2.66757	2.58694	0.609372	high
CGGA_867	1.00548	1	1.75499	2.51099	2.63992	2.08025	2.80474	2.7347	0.60972	high
CGGA_P157	1.28767	1	2.29664	2.4476	2.37171	2.28875	2.61947	2.70845	0.610029	high
CGGA_1916	0	0	1.5994	2.55188	2.66853	1.93832	2.69181	2.69005	0.610397	high
CGGA_1263	2.11507	1	1.49903	2.3512	2.42406	1.72165	2.41591	2.55125	0.611367	high
CGGA_1713	0.909589	1	1.95145	2.45418	2.71679	2.0204	2.77988	2.75289	0.611706	high
CGGA_902	0.528767	1	1.556	2.50723	2.64549	1.82574	2.58853	2.66794	0.612004	high
CGGA_658	1.01918	1	2.24647	2.38745	2.5437	2.02682	2.62092	2.50459	0.612293	high
CGGA_1653	4.14521	0	1.60335	2.43884	2.7578	1.69944	2.72549	2.29983	0.612805	high
CGGA_P308	1.54247	1	1.64107	2.29751	2.6613	1.61801	2.60587	2.36587	0.61306	high
CGGA_1666	0.682192	1	1.76731	1.74701	2.21616	1.31435	2.17874	2.36832	0.61367	high
CGGA_1215	0.0794521	1	1.8475	2.34326	2.71273	1.62862	2.51787	2.44812	0.614139	high
CGGA_P102	2.70959	0	2.03823	2.30229	2.56197	2.03069	2.70232	2.84382	0.614502	high
CGGA_568	0.780822	1	1.63194	2.43696	2.66376	1.72611	2.58615	2.48194	0.616092	high
CGGA_1292	6.63288	0	2.23112	2.00428	2.71007	1.61948	2.60191	2.64797	0.617089	high
CGGA_1572	0.438356	1	1.77267	2.32558	2.72083	1.67248	2.64079	2.45962	0.619163	high
CGGA_1159	6.75068	0	1.6775	2.46956	2.75616	1.6606	2.59148	2.39318	0.620168	high
CGGA_1318	4.10137	0	1.62636	2.41643	2.62024	1.7806	2.53379	2.80002	0.623624	high
CGGA_1381	0.126027	1	1.86447	2.17987	2.70314	1.82376	2.82493	2.7684	0.624176	high
CGGA_1750	0.684932	1	1.80591	2.439	2.67327	1.82775	2.6788	2.46362	0.624277	high
CGGA_1300	3.91233	1	1.81562	2.34023	2.61595	1.86169	2.65906	2.73201	0.62604	high
CGGA_P326	1.50959	0	1.72327	2.22682	2.64195	1.72611	2.71785	2.56564	0.626758	high
CGGA_680	7.63836	1	2.04117	2.00802	2.53365	1.68685	2.61435	2.58297	0.627401	high
CGGA_1039	1.99178	1	2.11217	2.1742	2.72289	1.81473	2.75324	2.74249	0.629035	high
CGGA_1521	0.561644	1	2.21401	2.52955	2.40561	2.25388	2.60048	2.72514	0.629812	high
CGGA_507	0.89863	1	2.01748	2.46291	2.62608	1.94212	2.66635	2.49488	0.630937	high
CGGA_1002	0.835616	1	1.79847	2.48066	2.64072	1.85513	2.65466	2.48074	0.634026	high
CGGA_P28	0.293151	1	2.45494	2.49491	2.52743	2.28367	2.70588	2.75694	0.634454	high
CGGA_1322	0.693151	1	2.35584	2.30108	2.9002	1.75866	2.68846	2.66762	0.634623	high
CGGA_P21	3.27397	0	1.56219	2.39774	2.71397	1.73124	2.72982	2.55585	0.635393	high
CGGA_1257	0.526027	1	2.03553	2.35481	2.56969	1.78847	2.5429	2.39114	0.636553	high
CGGA_487	0.427397	1	2.25295	2.54626	2.47345	2.22143	2.59815	2.77261	0.637	high
CGGA_P22	1.11233	1	1.92051	2.57398	2.59766	2.14079	2.7816	2.68291	0.638605	high
CGGA_P89	0.805479	1	2.12866	2.51279	2.51119	2.22383	2.72729	2.79858	0.640376	high
CGGA_1275	0.50137	1	0.40017	2.7078	2.34499	1.98399	2.78506	2.77829	0.64332	high
CGGA_P83	2.82192	0	1.7508	2.42079	2.6555	1.794	2.65184	2.58844	0.645029	high
CGGA_1091	3.05753	1	2.04895	2.45421	2.49151	2.0305	2.6269	2.58188	0.646245	high
CGGA_1105	1.66849	1	1.79464	2.76533	2.67909	2.08144	2.6617	2.73818	0.648142	high
CGGA_P358	1.38082	0	1.84343	2.48439	2.68249	1.76084	2.59037	2.47515	0.651829	high
CGGA_P100	0.734247	1	1.96068	2.27159	2.56902	1.91224	2.74358	2.69378	0.652135	high
CGGA_1144	6.86301	0	2.05079	2.35102	2.6115	1.71298	2.55641	2.31158	0.657487	high
CGGA_108	1.00274	1	1.97611	2.46306	2.5851	1.93371	2.63276	2.63605	0.659367	high
CGGA_1749	1.09863	1	2.17538	2.62582	2.56747	2.17053	2.65934	2.71682	0.660683	high
CGGA_J023	2.81644	1	1.80236	2.38147	2.68663	1.86636	2.81807	2.62479	0.660776	high
CGGA_1214	1.65479	1	1.5749	2.47096	2.58952	1.86365	2.70031	2.69563	0.6658	high
CGGA_1500	0.29589	1	1.74515	2.34825	2.59514	1.66806	2.55267	2.5274	0.666392	high
CGGA_810	1.50959	1	1.7646	2.52008	2.40579	2.09101	2.65559	2.73392	0.666705	high
CGGA_413	0.50137	0	1.83272	2.4465	2.34602	2.0633	2.65474	2.56533	0.667364	high
CGGA_1487	1.42466	1	1.77532	2.43853	2.38442	1.98364	2.59616	2.65658	0.669675	high
CGGA_1287	1.46027	1	2.27861	2.04527	2.50856	1.74231	2.5767	2.66783	0.67008	high
CGGA_703	3.71233	1	1.62449	2.64536	2.44463	2.11538	2.67162	2.75258	0.670641	high
CGGA_1709	1.13699	1	1.5287	2.41878	2.44663	2.07554	2.8285	2.90512	0.671134	high
CGGA_1661	4.12329	0	1.78448	2.23809	2.79982	1.46865	2.7107	2.27032	0.672214	high
CGGA_P11	1.1863	0	1.43706	2.41234	2.70812	1.6939	2.75095	2.67284	0.675471	high
CGGA_1657	4.13973	0	1.85338	2.45046	2.77364	1.7049	2.71458	2.42498	0.676674	high
CGGA_1141	1.18356	1	1.73363	2.44426	2.59826	1.76557	2.66845	2.38784	0.676743	high
CGGA_1619	2.09863	1	1.51698	2.47414	2.53114	1.84749	2.72222	2.51289	0.677094	high
CGGA_1074	0.235616	1	2.07866	2.51762	2.40311	2.11438	2.60019	2.65685	0.677444	high
CGGA_1097	3.77534	1	1.84788	2.50906	2.55248	2.04012	2.73733	2.77531	0.678733	high
CGGA_D16	0.715068	1	1.91769	2.63247	2.60774	1.84793	2.43498	2.6641	0.679814	high
CGGA_1491	1.4	1	1.56433	2.46562	2.4286	1.85037	2.53952	2.69627	0.680411	high
CGGA_1411	0.90137	1	2.01639	2.41548	2.5639	1.74704	2.48305	2.49101	0.680927	high
CGGA_1906	2.13425	0	1.42283	2.43916	2.73164	1.67248	2.7639	2.60811	0.681438	high
CGGA_1034	2.06301	1	2.17803	2.41109	2.4312	1.99479	2.54136	2.66635	0.683344	high
CGGA_1807	0.676712	1	2.24197	2.36489	2.5974	1.92113	2.65444	2.64934	0.683539	high
CGGA_530	1.3863	1	2.07769	2.57465	2.52788	2.07607	2.64493	2.67017	0.684878	high
CGGA_279	3.6	1	2.00444	2.34567	2.74458	1.85133	2.84274	2.6747	0.685445	high
CGGA_D57	2.09863	1	1.70452	2.40695	2.47856	1.82574	2.61929	2.55763	0.685463	high
CGGA_1311	2.9589	1	1.88888	2.08104	2.55605	1.42818	2.55353	2.16513	0.685684	high
CGGA_1502	5.09863	0	1.53787	2.46984	2.6115	1.62945	2.60499	2.31925	0.686677	high
CGGA_1248	0.378082	1	1.78188	2.31857	2.45847	1.78958	2.64811	2.44076	0.688231	high
CGGA_1623	4.39178	0	1.60138	2.62813	2.6173	1.77832	2.5402	2.59682	0.691574	high
CGGA_1410	2.26027	1	2.52213	2.25193	2.50986	1.99368	2.61054	2.78519	0.692069	high
CGGA_1051	2.29589	1	1.91495	2.34264	2.55483	1.60965	2.47969	2.3419	0.692447	high
CGGA_P356	1.3863	0	1.228	2.46277	2.80621	1.42818	2.63526	2.52664	0.693361	high
CGGA_P182	2.31781	0	2.37971	2.5341	2.42909	2.20119	2.6153	2.72894	0.697938	high
CGGA_1697	0.986301	0	1.74087	2.45771	2.60887	1.80055	2.70332	2.53523	0.69929	high
CGGA_1520	0.813699	1	1.72327	2.38595	2.59809	1.69806	2.68821	2.3807	0.700102	high
CGGA_1614	2.95616	1	1.62823	2.34524	2.65427	1.66658	2.70882	2.60922	0.700268	high
CGGA_509	1.70685	1	2.06167	2.45771	2.48724	2.11112	2.76177	2.77568	0.701475	high
CGGA_245	0.871233	1	1.56491	2.33016	2.59695	1.62559	2.69684	2.43325	0.701733	high
CGGA_1688	0.139726	1	1.49012	2.58816	2.38423	1.96913	2.58378	2.76172	0.703634	high
CGGA_834	9.28219	0	1.24972	2.45157	2.24274	1.89347	2.62706	2.57705	0.704814	high
CGGA_1541	0.221918	1	1.84788	2.53465	2.60455	1.91306	2.7451	2.53165	0.707225	high
CGGA_1508	2.87397	1	1.32419	2.46491	2.60193	1.57641	2.59923	2.50725	0.709958	high
CGGA_P159	0.578082	1	2.59058	2.37228	2.31801	2.24277	2.63221	2.75628	0.712921	high
CGGA_P311	1.59178	0	1.49012	2.46675	2.70397	1.74134	2.78089	2.75709	0.714113	high
CGGA_1685	0.616438	1	2.07405	2.35017	2.46442	1.85607	2.60986	2.52423	0.714405	high
CGGA_1256	6.11781	0	1.57493	2.45091	2.65795	1.6484	2.70426	2.42878	0.715852	high
CGGA_852	0.463014	1	2.21522	2.4441	2.53192	1.94589	2.63627	2.58441	0.716187	high
CGGA_1819	2.76164	0	1.89482	2.62435	2.65598	1.95769	2.72766	2.66046	0.716313	high
CGGA_1729	0.668493	1	1.79344	2.39864	2.60597	1.6826	2.64478	2.45176	0.718228	high
CGGA_D30	0.589041	1	1.82331	2.22326	2.54045	1.69085	2.71614	2.52517	0.719703	high
CGGA_1419	0.682192	1	1.80221	2.70734	2.70861	1.8763	2.6401	2.69595	0.723965	high
CGGA_1343	0.257534	1	2.56986	2.28293	2.67848	2.00855	2.87174	2.71598	0.73072	high
CGGA_1388	1.32877	1	2.06243	2.47146	2.49224	2.04607	2.78632	2.60809	0.731495	high
CGGA_621	3.69041	0	1.50496	2.54867	2.79283	1.62131	2.72227	2.61106	0.731847	high
CGGA_1258	0.312329	1	1.54432	2.53798	2.52425	1.98194	2.85639	2.71924	0.732198	high
CGGA_1295	0.849315	1	1.73943	2.58126	2.64489	1.89211	2.75553	2.69503	0.732251	high
CGGA_1375	0.252055	1	2.13996	2.42382	2.69212	1.86906	2.77674	2.64774	0.732676	high
CGGA_P388	0.80274	1	1.85447	2.55758	2.64702	1.88778	2.70571	2.75444	0.73281	high
CGGA_D64	0.276712	1	2.20438	2.45553	2.61085	2.02497	2.78135	2.80451	0.733897	high
CGGA_1715	2.38904	0	1.80221	2.60581	2.64014	1.87088	2.70268	2.61804	0.734368	high
CGGA_1390	5.61644	0	2.04357	2.52251	2.62282	1.8247	2.66628	2.42896	0.73444	high
CGGA_1444	1.30411	1	2.16382	2.34045	2.60091	1.90978	2.76819	2.74772	0.735135	high
CGGA_1048	1.92603	0	2.07648	2.5974	2.64007	1.91469	2.68859	2.52474	0.736282	high
CGGA_554	0.367123	1	1.54238	2.28588	2.74761	1.38947	2.69655	2.37577	0.737831	high
CGGA_488	1.19178	1	2.71821	2.40516	2.74355	2.20175	3.07506	2.60427	0.73797	high
CGGA_1260	0.484932	1	1.68738	2.47248	2.72223	1.61966	2.66284	2.59672	0.742723	high
CGGA_1558	0.356164	1	1.63378	2.48977	2.50497	1.88075	2.75488	2.65589	0.744447	high
CGGA_1223	1.86849	1	1.9523	2.66308	2.60269	2.01794	2.72168	2.72158	0.745334	high
CGGA_1012	8.53699	0	1.70021	2.39828	2.63507	1.63903	2.60613	2.76786	0.747858	high
CGGA_1011	0.29863	1	1.927	2.37925	2.49517	1.69612	2.48804	2.65641	0.749227	high
CGGA_1826	0.120548	1	2.09704	2.55393	2.57905	1.89724	2.59139	2.72287	0.752453	high
CGGA_1862	0.30137	1	2.1657	2.66854	2.44231	2.1473	2.65509	2.6545	0.752711	high
CGGA_D32	0.980822	1	2.1768	2.66775	2.43402	2.15861	2.68846	2.5751	0.754377	high
CGGA_1460	0.572603	1	2.17246	2.47447	2.61753	1.93157	2.74768	2.67485	0.755008	high
CGGA_318	0.608219	1	1.25423	2.53459	2.2496	2.02311	2.79174	2.67475	0.755654	high
CGGA_1272	0.339726	1	2.20865	2.35561	2.78396	1.73633	2.74499	2.77566	0.758132	high
CGGA_1682	0.945205	1	2.26078	2.35752	2.42597	1.93293	2.61873	2.66555	0.758245	high
CGGA_1505	0.471233	1	2.10716	2.37346	2.49117	1.85418	2.63812	2.66525	0.758451	high
CGGA_681	0.30137	1	2.19336	2.32545	2.57302	1.6774	2.53273	2.58637	0.758746	high
CGGA_837	1.18356	1	1.32588	2.61194	2.49614	1.7435	2.69658	2.40045	0.759739	high
CGGA_362	4.60274	0	1.9777	2.57046	2.4647	1.84942	2.52626	2.50507	0.759998	high
CGGA_P319	1.54795	0	1.87257	2.46061	2.60429	1.73884	2.62137	2.70138	0.761684	high
CGGA_1563	4.70959	0	1.92418	2.55597	2.42265	2.0697	2.73226	2.73769	0.762567	high
CGGA_1068	0.186301	1	2.05448	2.40486	2.63928	1.71791	2.63921	2.62346	0.762923	high
CGGA_1880	2.34247	0	1.86627	2.18387	2.75083	1.48437	2.73288	2.68463	0.765948	high
CGGA_1172	6.6137	0	1.81442	2.41148	2.56863	1.81854	2.77283	2.69868	0.767525	high
CGGA_1899	0.482192	1	1.78577	2.37267	2.6542	1.64217	2.75502	2.50968	0.769432	high
CGGA_1911	2.08767	0	1.95399	2.5352	2.62008	1.99499	2.83783	2.86769	0.773343	high
CGGA_1658	4.12877	0	1.89874	2.38689	2.58709	1.61468	2.55439	2.6054	0.773576	high
CGGA_1387	0.246575	1	2.42346	2.39593	2.34925	2.12696	2.67599	2.77839	0.774366	high
CGGA_106	11.9836	0	1.76865	2.50627	2.60176	1.6636	2.59598	2.55653	0.774779	high
CGGA_P328	1.49589	0	1.93408	2.43285	2.62126	1.57093	2.48196	2.60959	0.777967	high
CGGA_P346	1.43014	0	1.60531	2.45887	2.66847	1.6636	2.77738	2.61134	0.779548	high
CGGA_1026	4.30137	1	2.3242	2.55568	2.67372	1.91818	2.72169	2.60986	0.779791	high
CGGA_782	0.791781	1	1.87953	2.43726	2.46831	1.75405	2.61732	2.50408	0.781336	high
CGGA_269	8.03288	0	2.04852	2.37314	2.53696	1.61485	2.50788	2.48021	0.781714	high
CGGA_1415	5.49863	0	2.23898	2.49055	2.43072	1.93832	2.56641	2.65735	0.784403	high
CGGA_D11	2.26575	1	2.10443	2.49795	2.48233	1.90765	2.67025	2.56331	0.785643	high
CGGA_1337	5.82466	0	1.78706	2.40505	2.63448	1.53465	2.6319	2.39359	0.786201	high
CGGA_1231	6.24384	1	1.84333	2.44998	2.63211	1.77666	2.78527	2.6762	0.78687	high
CGGA_1475	0.49863	1	2.04895	2.27438	2.52039	1.64348	2.60767	2.56446	0.789009	high
CGGA_605	10.0493	0	1.84681	2.68891	2.73645	1.61173	2.51173	2.52128	0.79056	high
CGGA_881	0.690411	1	1.92326	2.80151	2.39512	2.25637	2.72102	2.87065	0.790708	high
CGGA_P31	3.30137	0	1.38067	2.64721	2.68298	1.50808	2.56135	2.50589	0.79172	high
CGGA_643	0.906849	1	1.94394	2.48262	2.7971	1.63313	2.78506	2.48601	0.793093	high
CGGA_1382	0.778082	1	2.34569	2.46718	2.38519	2.07607	2.67362	2.71736	0.794008	high
CGGA_1332	1.39726	0	1.68814	2.42154	2.35725	2.1064	2.97823	2.80901	0.794859	high
CGGA_1543	1.98082	1	1.84566	2.59198	2.70905	1.80699	2.81313	2.61893	0.796433	high
CGGA_1299	1.50685	1	1.73032	2.6511	2.36358	2.01999	2.6803	2.67867	0.797358	high
CGGA_1208	0.441096	1	2.16335	2.35544	2.38327	1.87179	2.56865	2.79014	0.798602	high
CGGA_P143	0.715068	1	2.42697	2.59083	2.46798	2.13904	2.67776	2.80183	0.799886	high
CGGA_1014	0.720548	1	1.87048	2.55678	2.55868	1.85228	2.72211	2.65381	0.800003	high
CGGA_1425	1.75342	1	1.9074	2.58959	2.54906	1.80805	2.65387	2.52218	0.801263	high
CGGA_1374	0.386301	1	1.89594	2.45605	2.62304	1.77334	2.80704	2.5846	0.803092	high
CGGA_P295	0.747945	1	1.65002	2.63366	2.61506	1.78624	2.71223	2.69239	0.804258	high
CGGA_1694	1.70959	1	1.41115	2.69446	2.51406	1.97403	2.87295	2.75567	0.805756	high
CGGA_1434	0.221918	1	1.93674	2.75305	2.5162	2.00151	2.67229	2.64051	0.806623	high
CGGA_107	5.90685	1	2.38894	2.53825	2.43298	2.0283	2.60665	2.70406	0.806952	high
CGGA_1773	0.284932	1	2.11157	2.34242	2.49182	1.8763	2.75119	2.79106	0.808377	high
CGGA_1738	1.28493	1	1.7947	2.52159	2.65151	1.82163	2.83235	2.76699	0.810063	high
CGGA_1370	6.32877	0	2.03456	2.43616	2.19452	2.05935	2.64307	2.70483	0.813524	high
CGGA_1081	0.591781	1	1.48742	2.40096	2.49735	1.58937	2.6312	2.69719	0.814633	high
CGGA_1049	2.21644	1	1.72127	2.55123	2.53717	1.8554	2.76256	2.76436	0.815334	high
CGGA_1687	3.87397	0	2.0872	2.66434	2.55072	2.00473	2.68533	2.838	0.81596	high
CGGA_878	2.36438	1	1.84888	2.58722	2.5174	1.87441	2.69321	2.72973	0.817836	high
CGGA_1598	1.54521	1	1.89874	2.48106	2.74491	1.6636	2.77692	2.66421	0.819542	high
CGGA_1507	1.9589	1	1.84454	2.50943	2.55493	1.74259	2.64789	2.71489	0.82068	high
CGGA_1811	0.832877	1	1.95651	2.48333	2.61304	1.5854	2.51593	2.62604	0.822405	high
CGGA_P160	0.6	1	2.27788	2.58636	2.48882	1.99169	2.63182	2.76669	0.823231	high
CGGA_1320	0.161644	1	1.97074	2.58259	2.23708	2.07439	2.58498	2.7941	0.823784	high
CGGA_P269	1.4	1	1.72177	2.44563	2.71445	1.50808	2.79176	2.27998	0.82437	high
CGGA_1216	0.854795	1	1.64509	2.54155	2.40342	1.95201	2.83478	2.67743	0.825931	high
CGGA_1760	1.25753	1	1.80713	2.42377	2.59031	1.56166	2.63394	2.49841	0.826382	high
CGGA_P364	1.35616	1	1.90068	2.27379	2.65754	1.53465	2.7319	2.63169	0.826441	high
CGGA_1226	1.83562	1	1.96969	2.48847	2.44324	1.71696	2.52387	2.55979	0.827895	high
CGGA_1663	0.794521	1	1.90261	2.39647	2.66632	1.46406	2.57623	2.51633	0.83025	high
CGGA_1985	1.0411	1	1.61115	2.50822	2.74246	1.56539	2.76026	2.67506	0.831629	high
CGGA_1820	0.210959	1	1.64646	2.43696	2.46153	1.74009	2.69413	2.78339	0.83273	high
CGGA_1270	0.515068	1	1.56868	2.20863	2.33803	1.4884	2.59012	2.46661	0.834469	high
CGGA_604	1.04384	1	1.90816	2.70636	2.43091	2.08464	2.75679	2.76216	0.834493	high
CGGA_1815	0.506849	1	1.91681	2.73145	2.53874	1.90146	2.62544	2.71909	0.836665	high
CGGA_1138	1.12603	1	2.0872	2.63537	2.53226	2.05381	2.77751	2.89999	0.83677	high
CGGA_1255	0.361644	1	2.14246	2.71941	2.50161	2.10389	2.76592	2.72763	0.836782	high
CGGA_1280	1.22466	1	2.25947	2.37893	2.38015	1.92768	2.69911	2.6612	0.837527	high
CGGA_1603	0.975342	1	1.3647	2.44776	2.53325	1.64374	2.73123	2.88604	0.838222	high
CGGA_1359	0.939726	1	1.52405	2.51362	2.57719	1.6453	2.71087	2.72164	0.839109	high
CGGA_1492	0.734247	1	2.24272	2.45241	2.4434	1.85323	2.61208	2.6591	0.839755	high
CGGA_1443	5.3589	0	1.86838	2.5911	2.62032	1.71164	2.65955	2.63738	0.841344	high
CGGA_727	2.80274	1	2.2758	2.33552	2.52289	1.71666	2.63812	2.62539	0.843455	high
CGGA_1036	3.19452	1	1.63194	2.42145	2.54379	1.64685	2.73794	2.7067	0.846221	high
CGGA_1565	3.88219	0	1.71724	2.45873	2.58429	1.58003	2.65772	2.61097	0.847243	high
CGGA_1476	0.819178	1	1.9314	2.4622	2.47372	1.75363	2.67115	2.64181	0.853605	high
CGGA_1111	7.07397	0	1.87774	2.56415	2.74359	1.64217	2.73024	2.70266	0.854114	high
CGGA_P87	0.657534	1	1.64646	2.60253	2.67867	1.45942	2.52327	2.5703	0.854722	high
CGGA_1218	0.783562	1	2.09157	2.50791	2.51809	1.76323	2.63734	2.60784	0.85579	high
CGGA_1596	0.561644	1	1.90645	2.65702	2.51263	1.94212	2.77318	2.70036	0.856503	high
CGGA_1238	6.25205	0	2.05595	2.60126	2.60488	1.71164	2.58962	2.61848	0.85699	high
CGGA_1342	6.42466	0	1.62874	2.49701	2.31129	1.96294	2.81098	2.81873	0.858909	high
CGGA_1601	1.94521	1	1.96234	2.57559	2.36605	1.93371	2.68132	2.63388	0.859527	high
CGGA_1157	2.03014	1	1.68738	2.55002	2.63692	1.65759	2.7816	2.5801	0.860173	high
CGGA_P415	0.534247	1	1.92509	2.61258	2.62306	1.6606	2.58972	2.64855	0.86366	high
CGGA_1612	1.96712	1	2.08485	2.68721	2.52066	1.99957	2.75726	2.7455	0.866698	high
CGGA_P7	0.30137	1	1.91214	2.57446	2.36768	1.84846	2.58944	2.68634	0.867662	high
CGGA_1180	7.2	0	1.0529	2.57409	2.41533	1.78105	2.86093	2.85888	0.867667	high
CGGA_869	1.47123	0	1.4454	2.51326	2.58127	1.65759	2.85137	2.65147	0.869438	high
CGGA_1478	1.48493	1	1.44263	2.70354	2.50608	1.85037	2.79937	2.7737	0.870737	high
CGGA_120	0.789041	1	1.48507	2.61757	2.54791	1.63744	2.66744	2.67248	0.872686	high
CGGA_1631	0.605479	1	2.09475	2.67787	2.67308	1.84167	2.82877	2.48681	0.873393	high
CGGA_1690	1.62192	1	1.83437	2.54084	2.53425	1.74383	2.71302	2.71012	0.876573	high
CGGA_679	0.720548	1	2.00557	2.41373	2.57522	1.71034	2.74896	2.75451	0.876709	high
CGGA_P283	1.81918	0	2.28053	2.43077	2.5327	1.76202	2.65673	2.69842	0.877376	high
CGGA_1459	1.43014	0	2.1905	2.43507	2.44633	1.75845	2.6184	2.62785	0.879548	high
CGGA_1314	0.471233	1	1.55343	2.37637	2.59506	1.49237	2.71308	2.76499	0.879813	high
CGGA_1035	1.55342	1	1.82768	2.54425	2.45434	1.83746	2.79216	2.61212	0.881501	high
CGGA_1391	1.16712	1	1.79972	2.63185	2.59705	1.7929	2.79925	2.6742	0.881866	high
CGGA_1946	0.389041	1	2.0648	2.5174	2.35546	1.99169	2.7305	2.84621	0.883057	high
CGGA_1551	0.950685	1	1.51698	2.57811	2.65679	1.4996	2.75047	2.40003	0.883993	high
CGGA_1634	1.00274	1	1.24869	2.70461	2.80319	1.42569	2.72324	2.64673	0.884922	high
CGGA_1139	3.27671	1	1.3604	2.44489	2.2996	1.67052	2.692	2.64639	0.887802	high
CGGA_1022	8.94521	0	1.89159	2.4777	2.35523	1.69085	2.53837	2.60118	0.887923	high
CGGA_1518	1.12603	1	2.0189	2.63343	2.4875	1.82775	2.66886	2.60792	0.891276	high
CGGA_1457	0.854795	1	2.1905	2.60447	2.53092	1.7929	2.57593	2.75816	0.893123	high
CGGA_831	1.49589	1	2.27081	2.58163	2.53114	1.90978	2.73844	2.72322	0.896137	high
CGGA_1533	3.33425	1	1.54013	2.58645	2.63722	1.46636	2.64988	2.51856	0.897143	high
CGGA_796	1.53151	0	2.31863	2.39762	2.29577	1.76323	2.51365	2.51136	0.897597	high
CGGA_1023	1.86575	1	1.08652	2.72033	2.24832	1.76775	2.67068	2.54323	0.89782	high
CGGA_1744	3.37534	0	1.62261	2.64982	2.6617	1.61468	2.78421	2.51169	0.898707	high
CGGA_1237	0.810959	1	1.76981	2.36464	2.27042	1.78756	2.76064	2.59213	0.899734	high
CGGA_1392	1.29589	1	1.5098	2.38197	2.5662	1.4996	2.84312	2.49001	0.900753	high
CGGA_1393	0.753425	1	1.64936	2.6596	2.45993	1.84034	2.76042	2.75077	0.903106	high
CGGA_1865	0.243836	1	2.18303	2.73768	2.55575	1.89639	2.69613	2.59497	0.904173	high
CGGA_1234	1.93151	1	2.04029	2.54776	2.55915	1.79715	2.7679	2.7299	0.905578	high
CGGA_1564	0.520548	1	1.90645	2.57455	2.51119	1.8745	2.84108	2.755	0.906345	high
CGGA_1833	1.35342	1	2.13691	2.47578	2.4341	1.84069	2.69181	2.80258	0.907768	high
CGGA_1548	2.88767	1	1.50007	2.6231	2.5821	1.66211	2.80958	2.6742	0.914402	high
CGGA_1452	1.28219	1	1.33806	2.54404	2.54591	1.60456	2.85052	2.65435	0.917022	high
CGGA_1073	0.739726	1	1.70357	2.64661	2.39825	1.79291	2.70921	2.58078	0.9191	high
CGGA_P199	0.556164	1	1.85338	2.39227	2.51655	1.65455	2.79382	2.71664	0.919875	high
CGGA_426	4.27397	1	1.49471	2.83879	2.2785	1.99346	2.77207	2.50951	0.920004	high
CGGA_D37	2.64384	1	1.3219	2.6211	2.32702	1.88664	2.88692	2.74274	0.920113	high
CGGA_1338	3.07397	1	1.66505	2.58574	2.46701	1.72537	2.71346	2.75979	0.921599	high
CGGA_1659	1.06027	1	2.37851	2.59946	2.48016	1.90062	2.67322	2.69823	0.925877	high
CGGA_1353	2.8	1	2.11915	2.45106	2.45164	1.794	2.72814	2.80031	0.931104	high
CGGA_1106	1.15068	1	2.24197	2.60278	2.4991	1.91792	2.7529	2.7939	0.93286	high
CGGA_1271	1.43288	1	1.96761	2.53289	2.38522	1.90353	2.8416	2.65794	0.934041	high
CGGA_1462	0.515068	1	1.83892	2.61637	2.43039	1.82876	2.71708	2.81067	0.936368	high
CGGA_624	0.334247	1	2.11544	2.78756	2.52628	1.91898	2.6875	2.73647	0.936481	high
CGGA_1057	4.24384	1	1.94112	2.55869	2.68236	1.58894	2.75445	2.64157	0.936784	high
CGGA_1408	3.73151	1	2.42446	2.49204	2.37695	1.74112	2.55271	2.42099	0.938737	high
CGGA_1597	0.476712	1	1.83779	2.60312	2.52754	1.67829	2.71458	2.6157	0.939363	high
CGGA_1886	0.926027	1	2.06355	2.52251	2.60091	1.69668	2.78524	2.68729	0.943087	high
CGGA_309	0.380822	1	2.2629	2.29915	2.21651	1.77996	2.64184	2.57328	0.946729	high
CGGA_1326	0.882192	1	2.00665	2.583	2.5992	1.71564	2.8235	2.58814	0.950054	high
CGGA_1070	0.912329	1	1.99248	2.56832	2.49003	1.70393	2.66954	2.68905	0.95031	high
CGGA_1972	1.66027	0	2.16942	2.49016	2.34313	1.82265	2.63673	2.76306	0.950737	high
CGGA_448	0.969863	1	1.8776	2.67672	2.54262	1.57612	2.55367	2.55982	0.953024	high
CGGA_1817	1.09315	1	1.97291	2.63862	2.54336	1.76321	2.75952	2.70658	0.958727	high
CGGA_1626	1.90685	1	2.04818	2.64436	2.53148	1.79069	2.76462	2.65381	0.959169	high
CGGA_1708	3.07397	1	1.51221	2.72581	2.64991	1.74876	2.89606	2.92678	0.959217	high
CGGA_274	1.67123	0	1.81071	2.70949	2.62092	1.73753	2.81893	2.70036	0.960312	high
CGGA_1185	2.00274	1	1.89285	2.57465	2.46008	1.61301	2.5871	2.65643	0.962642	high
CGGA_1354	1.45205	1	1.66053	2.5273	2.47662	1.58717	2.68247	2.77218	0.966027	high
CGGA_1644	0.473973	1	1.7522	2.65073	2.51703	1.72351	2.79445	2.6562	0.967137	high
CGGA_1075	1.9726	0	1.63744	2.67781	2.47538	1.77257	2.805	2.76429	0.970945	high
CGGA_1537	0.547945	0	1.74087	2.66175	2.57738	1.63744	2.73003	2.72485	0.973518	high
CGGA_1613	0.684932	0	1.82393	2.58591	2.55371	1.74383	2.82964	2.885	0.975182	high
CGGA_1083	1.23288	1	1.84193	2.78695	2.295	1.90518	2.64553	2.64355	0.979883	high
CGGA_1334	0.4	1	1.9648	2.59601	2.50398	1.55219	2.57016	2.57137	0.980763	high
CGGA_272	0.652055	1	1.9815	2.57314	2.46857	1.83359	2.84642	2.78931	0.982279	high
CGGA_1071	7.87945	0	1.86845	2.4853	2.51625	1.4884	2.6331	2.62659	0.983305	high
CGGA_731	1.37808	1	1.80618	2.66274	2.23533	1.82968	2.64476	2.57913	0.984135	high
CGGA_876	0.435616	1	1.92758	2.6608	2.4109	1.84981	2.82671	2.56461	0.985114	high
CGGA_1053	1.0137	1	1.72581	2.47943	2.35758	1.70264	2.80395	2.65531	0.986885	high
CGGA_1433	1.33425	1	1.98476	2.55075	2.47094	1.61801	2.64826	2.64456	0.989896	high
CGGA_1656	0.408219	1	2.03689	2.71342	2.50852	1.8736	2.79689	2.80137	0.990456	high
CGGA_1698	1.06301	1	1.79972	2.63193	2.53917	1.69806	2.78963	2.77507	0.991588	high
CGGA_1875	2.3726	0	1.88987	2.57113	2.67886	1.50173	2.78499	2.57551	0.995823	high
CGGA_1814	0.605479	1	2.16146	2.61493	2.50435	1.6911	2.60199	2.80308	0.996468	high
CGGA_1461	0.619178	1	1.89874	2.60413	2.40258	1.69806	2.69057	2.61125	0.997741	high
CGGA_1857	0.430137	1	1.70178	2.52752	2.54968	1.45475	2.69449	2.60333	0.998268	high
CGGA_1758	1.13425	1	2.38613	2.65122	2.54176	1.77718	2.70496	2.61839	1.00233	high
CGGA_1866	0.347945	1	2.15717	2.61605	2.44587	1.82673	2.74456	2.76907	1.00379	high
CGGA_1402	5.56164	0	1.58528	2.59488	2.47205	1.556	2.6864	2.76508	1.00698	high
CGGA_D62	1.36986	1	1.56111	2.25929	2.30756	1.32937	2.62913	2.50236	1.00754	high
CGGA_1152	6.80548	0	1.53101	2.68098	2.73993	1.41815	2.79536	2.63977	1.01019	high
CGGA_1285	0.216438	1	1.11273	2.7607	2.4295	1.65362	2.83239	2.72497	1.01079	high
CGGA_1538	0.676712	1	2.14495	2.69766	2.56533	1.76675	2.74348	2.77075	1.01324	high
CGGA_1004	2.46301	1	1.99689	2.58445	2.64181	1.46601	2.63796	2.67225	1.01383	high
CGGA_1007	0.945205	1	1.76734	2.72777	2.31795	1.79609	2.69724	2.60936	1.01496	high
CGGA_1001	9.00822	0	1.8978	2.51223	2.53431	1.37062	2.53273	2.59923	1.01624	high
CGGA_1171	1.12877	1	1.98653	2.6599	2.4255	1.70778	2.64492	2.70999	1.01911	high
CGGA_1586	0.635616	1	1.90165	2.65906	2.44571	1.69944	2.68989	2.72624	1.02003	high
CGGA_1736	2.56986	1	1.58936	2.63178	2.4592	1.56353	2.68495	2.77318	1.02883	high
CGGA_525	0.378082	1	1.23366	2.77441	2.3338	1.63611	2.71715	2.62874	1.03445	high
CGGA_1441	3.67123	1	1.64646	2.60963	2.54036	1.49313	2.74199	2.64521	1.03729	high
CGGA_1371	5.69589	0	1.48507	2.50159	2.50961	1.48658	2.88695	2.6069	1.03756	high
CGGA_1227	3.27945	1	2.06614	2.65033	2.42377	1.78323	2.72219	2.80465	1.03773	high
CGGA_1134	0.161644	1	2.35128	2.58218	2.4176	1.77946	2.68151	2.74741	1.04131	high
CGGA_1114	1.26027	1	2.16364	2.51426	2.38458	1.82177	2.8639	2.71698	1.04422	high
CGGA_859	1.06027	1	2.17309	2.63473	2.43063	1.72041	2.72381	2.53643	1.04424	high
CGGA_D26	0.720548	1	2.03722	2.60201	2.28995	1.80343	2.72356	2.68264	1.04909	high
CGGA_1006	0.69589	1	2.49847	2.66643	2.66638	1.84981	2.88102	2.90044	1.05352	high
CGGA_848	0.558904	0	2.07906	2.57294	2.56451	1.57275	2.74144	2.69427	1.05408	high
CGGA_1313	1.03836	1	2.02101	2.55648	2.4275	1.60544	2.6681	2.7515	1.06268	high
CGGA_1346	0.778082	1	1.60021	2.71629	2.38142	1.65219	2.7105	2.75313	1.06628	high
CGGA_1624	0.238356	1	1.66226	2.74955	2.77153	1.51848	2.90347	2.80128	1.06996	high
CGGA_1024	8.42192	1	2.12544	2.51019	2.28956	1.58609	2.56675	2.60797	1.07721	high
CGGA_1282	3.05753	1	1.87257	2.76115	2.23794	1.85418	2.67108	2.78542	1.07872	high
CGGA_1240	0.0520548	1	2.1709	2.62856	2.37727	1.76775	2.77098	2.7178	1.09542	high
CGGA_616	2.60822	1	2.13484	2.59234	2.50691	1.68012	2.87487	2.70218	1.10464	high
CGGA_1079	1.29041	1	2.09501	2.57486	2.52741	1.51178	2.75997	2.58623	1.11036	high
CGGA_1706	3.73699	0	1.68082	2.6987	2.42232	1.57641	2.78429	2.59885	1.11218	high
CGGA_676	1.03014	1	2.35584	2.45762	2.28878	1.59424	2.61683	2.5679	1.1142	high
CGGA_1142	2.75342	1	1.83892	2.53586	2.54272	1.50386	2.8466	2.8252	1.11904	high
CGGA_1451	1.2	1	1.80591	2.56257	2.42597	1.57822	2.85782	2.66988	1.1191	high
CGGA_1145	0.654795	1	1.68618	2.68891	2.33203	1.57275	2.68016	2.65354	1.1197	high
CGGA_1546	0.610959	1	1.46432	2.76291	2.4708	1.50808	2.79516	2.60941	1.12253	high
CGGA_1099	0.334247	1	1.77228	2.42666	2.37598	1.5268	2.7762	2.98106	1.12308	high
CGGA_D35	1.81096	1	1.01404	2.59595	2.04557	1.5268	2.71346	2.59662	1.12918	high
CGGA_1015	0.449315	1	1.81371	2.7639	2.57801	1.56936	2.82379	2.72903	1.13226	high
CGGA_330	3.07123	1	2.03677	2.44326	2.25804	1.45763	2.60191	2.54537	1.13595	high
CGGA_D36	0.0931507	1	2.04073	2.56324	2.33203	1.71287	2.81759	2.81892	1.13946	high
CGGA_802	1.86575	1	1.60255	2.79951	2.38237	1.54318	2.68156	2.65838	1.14849	high
CGGA_1019	0.580822	1	1.64187	2.62905	2.47449	1.41588	2.75485	2.70256	1.15169	high
CGGA_1953	0.2	1	1.77267	2.37503	2.47511	1.25507	2.78322	2.57844	1.15552	high
CGGA_1135	3.21096	1	1.93674	2.59348	2.56941	1.43557	2.79724	2.7241	1.15604	high
CGGA_1008	0.863014	1	2.54561	2.61331	2.45246	1.80239	2.9215	2.64684	1.16582	high
CGGA_483	0.758904	1	2.35732	2.6828	2.29384	1.67052	2.57779	2.72488	1.17885	high
CGGA_1901	1.47945	1	1.98708	2.61741	2.51167	1.44764	2.76836	2.69673	1.18382	high
CGGA_1077	1.61918	1	1.1433	2.56637	2.41885	1.21402	2.77479	2.79075	1.20639	high
CGGA_1681	0.947945	1	1.57072	2.70325	2.28361	1.23008	2.49796	2.51356	1.24257	high
CGGA_1224	0.742466	1	1.06841	2.65795	2.32702	1.31032	2.85631	2.67969	1.24345	high
CGGA_1124	1.32603	1	1.71575	2.72741	2.35116	1.50217	2.88119	2.68496	1.28798	high
CGGA_1109	3.69315	1	2.25972	2.59179	2.25804	1.56251	2.76222	2.66889	1.28879	high
CGGA_1284	0.265753	1	1.80313	2.67942	2.13114	1.49435	2.67876	2.68425	1.3116	high
CGGA_842	0.641096	1	2.04551	2.74277	2.22015	1.42942	2.54746	2.69388	1.32364	high
CGGA_1177	1.23014	1	1.40502	2.81706	2.3216	1.27901	2.64568	2.80819	1.33496	high
CGGA_1045	0.953425	1	1.77146	2.82013	2.2197	1.41129	2.93506	2.8929	1.54505	high
