# Supplementary material for: Comprehensive analysis of histone deacetylases genes in the prognosis and immune infiltration of glioma patients
Source: Aging (Albany NY). 2022 May 11;14(9):4050–68. doi: 10.18632/aging.204071 (PMC9134955; doi:10.18632/aging.204071)
Supplement: Supplementary Table 2 [file aging-14-204071-s002.xlsx]

## Sheet: Supplementary Table 2
Supplementary Table 2. Clustering of glioma based on 11 HDAC genes in TCGA.
ID	Cluster
TCGA-HT-7475	Cluster1
TCGA-E1-A7Z3	Cluster1
TCGA-HT-7684	Cluster1
TCGA-DB-5275	Cluster1
TCGA-RY-A843	Cluster1
TCGA-S9-A7QZ	Cluster1
TCGA-FG-A6IZ	Cluster1
TCGA-DU-A5TY	Cluster2
TCGA-FG-A4MY	Cluster1
TCGA-DU-7309	Cluster1
TCGA-IK-8125	Cluster1
TCGA-14-0871	Cluster2
TCGA-HT-A61C	Cluster2
TCGA-HT-7694	Cluster1
TCGA-TQ-A7RF	Cluster2
TCGA-TM-A84G	Cluster1
TCGA-FG-5964	Cluster1
TCGA-DU-A5TP	Cluster2
TCGA-12-0619	Cluster2
TCGA-DU-8164	Cluster1
TCGA-FG-A70Z	Cluster2
TCGA-27-2524	Cluster2
TCGA-S9-A7J1	Cluster1
TCGA-06-2558	Cluster2
TCGA-32-2615	Cluster2
TCGA-QH-A65R	Cluster1
TCGA-CS-6666	Cluster2
TCGA-HT-7478	Cluster1
TCGA-HT-7609	Cluster1
TCGA-TQ-A7RK	Cluster1
TCGA-DB-5278	Cluster1
TCGA-HT-A74H	Cluster1
TCGA-26-5139	Cluster2
TCGA-WY-A85A	Cluster1
TCGA-HT-A5R7	Cluster1
TCGA-HT-A619	Cluster1
TCGA-06-0221	Cluster1
TCGA-DH-5140	Cluster2
TCGA-HT-7858	Cluster1
TCGA-VV-A86M	Cluster2
TCGA-TQ-A8XE	Cluster1
TCGA-CS-6667	Cluster1
TCGA-VV-A829	Cluster1
TCGA-06-0238	Cluster2
TCGA-06-0184	Cluster2
TCGA-06-0178	Cluster2
TCGA-CS-6290	Cluster1
TCGA-06-2570	Cluster2
TCGA-HT-8105	Cluster1
TCGA-DH-A7UT	Cluster1
TCGA-HW-A5KL	Cluster1
TCGA-DU-A7T6	Cluster1
TCGA-26-1442	Cluster1
TCGA-S9-A7R4	Cluster1
TCGA-S9-A6WO	Cluster1
TCGA-HT-8011	Cluster2
TCGA-E1-A7YH	Cluster1
TCGA-HT-8108	Cluster1
TCGA-CS-4941	Cluster2
TCGA-HT-8558	Cluster1
TCGA-DH-A7UV	Cluster1
TCGA-E1-5318	Cluster1
TCGA-02-2483	Cluster2
TCGA-TQ-A7RN	Cluster1
TCGA-DB-5270	Cluster1
TCGA-12-3652	Cluster2
TCGA-E1-A7YM	Cluster1
TCGA-06-0158	Cluster2
TCGA-HT-7470	Cluster1
TCGA-KT-A7W1	Cluster2
TCGA-HT-7884	Cluster1
TCGA-15-0742	Cluster2
TCGA-DU-A5TR	Cluster1
TCGA-HW-8322	Cluster1
TCGA-14-2554	Cluster2
TCGA-FG-A87N	Cluster2
TCGA-HT-7855	Cluster1
TCGA-S9-A6TS	Cluster1
TCGA-28-5208	Cluster2
TCGA-WY-A85E	Cluster1
TCGA-DH-A66G	Cluster1
TCGA-WH-A86K	Cluster1
TCGA-S9-A7QW	Cluster1
TCGA-28-5213	Cluster2
TCGA-DU-8167	Cluster1
TCGA-FN-7833	Cluster2
TCGA-FG-8189	Cluster1
TCGA-TQ-A7RV	Cluster1
TCGA-DU-6542	Cluster1
TCGA-FG-A60J	Cluster1
TCGA-S9-A6U8	Cluster1
TCGA-DU-6399	Cluster1
TCGA-DB-A4XF	Cluster1
TCGA-TM-A84L	Cluster1
TCGA-76-4929	Cluster2
TCGA-DU-7299	Cluster1
TCGA-DU-7015	Cluster1
TCGA-HT-8013	Cluster1
TCGA-HT-7468	Cluster1
TCGA-06-2565	Cluster2
TCGA-E1-5303	Cluster1
TCGA-S9-A7R2	Cluster1
TCGA-HT-8113	Cluster1
TCGA-S9-A6U5	Cluster1
TCGA-EZ-7264	Cluster1
TCGA-CS-4943	Cluster1
TCGA-P5-A735	Cluster1
TCGA-S9-A6WQ	Cluster1
TCGA-FG-6691	Cluster2
TCGA-DU-7018	Cluster1
TCGA-VM-A8C8	Cluster1
TCGA-HT-7882	Cluster2
TCGA-HT-A4DV	Cluster1
TCGA-P5-A5F1	Cluster1
TCGA-06-0211	Cluster2
TCGA-06-0139	Cluster2
TCGA-CS-5396	Cluster1
TCGA-DB-A75M	Cluster1
TCGA-19-1787	Cluster2
TCGA-P5-A781	Cluster1
TCGA-S9-A7IY	Cluster1
TCGA-CS-5397	Cluster1
TCGA-QH-A6X8	Cluster1
TCGA-DB-A4X9	Cluster1
TCGA-S9-A6U0	Cluster2
TCGA-27-1831	Cluster2
TCGA-RY-A83Y	Cluster1
TCGA-P5-A730	Cluster1
TCGA-HW-7489	Cluster1
TCGA-HT-7692	Cluster1
TCGA-HT-7686	Cluster2
TCGA-CS-4938	Cluster1
TCGA-S9-A6WP	Cluster1
TCGA-32-4213	Cluster2
TCGA-DB-A4XD	Cluster1
TCGA-S9-A7QX	Cluster1
TCGA-TM-A7CF	Cluster1
TCGA-FG-5962	Cluster1
TCGA-06-0168	Cluster2
TCGA-S9-A7IQ	Cluster1
TCGA-QH-A870	Cluster1
TCGA-12-1597	Cluster2
TCGA-S9-A7J3	Cluster1
TCGA-DB-A4XC	Cluster1
TCGA-06-0187	Cluster2
TCGA-DU-8162	Cluster1
TCGA-DU-A76L	Cluster2
TCGA-S9-A6TV	Cluster2
TCGA-HT-A5RA	Cluster2
TCGA-DU-A7TG	Cluster1
TCGA-S9-A6WI	Cluster1
TCGA-QH-A6X5	Cluster1
TCGA-HT-7482	Cluster1
TCGA-DU-A7TA	Cluster1
TCGA-76-4932	Cluster2
TCGA-DH-A7US	Cluster1
TCGA-27-2526	Cluster2
TCGA-S9-A7R7	Cluster2
TCGA-06-0749	Cluster2
TCGA-DU-8166	Cluster1
TCGA-32-1980	Cluster1
TCGA-DU-7010	Cluster2
TCGA-HW-7493	Cluster1
TCGA-QH-A6X4	Cluster1
TCGA-06-0157	Cluster2
TCGA-E1-A7YS	Cluster1
TCGA-FG-A4MX	Cluster2
TCGA-32-2616	Cluster2
TCGA-DH-5142	Cluster2
TCGA-RY-A83Z	Cluster1
TCGA-DU-7301	Cluster1
TCGA-28-5207	Cluster2
TCGA-VM-A8CA	Cluster1
TCGA-19-2620	Cluster2
TCGA-TM-A84I	Cluster2
TCGA-DU-6410	Cluster1
TCGA-DU-A76R	Cluster1
TCGA-DU-5853	Cluster1
TCGA-HW-8320	Cluster1
TCGA-06-5859	Cluster2
TCGA-HT-7476	Cluster1
TCGA-S9-A6UA	Cluster2
TCGA-HT-8564	Cluster2
TCGA-06-0743	Cluster2
TCGA-CS-6668	Cluster1
TCGA-HT-7601	Cluster1
TCGA-E1-A7YK	Cluster1
TCGA-TM-A84J	Cluster2
TCGA-12-3650	Cluster2
TCGA-FG-A60L	Cluster1
TCGA-HT-A61B	Cluster2
TCGA-28-1747	Cluster2
TCGA-14-1034	Cluster2
TCGA-12-5299	Cluster2
TCGA-32-1970	Cluster2
TCGA-28-2509	Cluster2
TCGA-FG-A6J1	Cluster1
TCGA-QH-A6CV	Cluster2
TCGA-HT-8019	Cluster1
TCGA-HT-7610	Cluster1
TCGA-TM-A84Q	Cluster1
TCGA-TQ-A7RH	Cluster1
TCGA-QH-A65X	Cluster1
TCGA-HT-A74K	Cluster1
TCGA-DU-6393	Cluster1
TCGA-06-2557	Cluster2
TCGA-E1-A7YD	Cluster2
TCGA-DU-A7T8	Cluster1
TCGA-DU-A5TU	Cluster2
TCGA-TM-A7C3	Cluster2
TCGA-DU-A5TW	Cluster2
TCGA-DB-5277	Cluster1
TCGA-HT-7856	Cluster1
TCGA-FG-A4MW	Cluster1
TCGA-FG-A4MU	Cluster2
TCGA-HT-7477	Cluster2
TCGA-06-5411	Cluster2
TCGA-VM-A8CE	Cluster1
TCGA-06-5408	Cluster2
TCGA-08-0386	Cluster2
TCGA-HT-7677	Cluster1
TCGA-TM-A84R	Cluster1
TCGA-S9-A7IZ	Cluster1
TCGA-06-0152	Cluster2
TCGA-S9-A89V	Cluster1
TCGA-DU-8158	Cluster1
TCGA-14-1825	Cluster2
TCGA-06-2564	Cluster2
TCGA-DU-7014	Cluster1
TCGA-06-0156	Cluster2
TCGA-DU-6401	Cluster1
TCGA-FG-A711	Cluster1
TCGA-QH-A6XA	Cluster1
TCGA-S9-A6WL	Cluster1
TCGA-19-2625	Cluster2
TCGA-E1-A7YN	Cluster1
TCGA-TQ-A7RM	Cluster2
TCGA-DB-A64V	Cluster1
TCGA-S9-A6U6	Cluster1
TCGA-FG-8191	Cluster1
TCGA-HT-7854	Cluster1
TCGA-FG-A6J3	Cluster1
TCGA-DU-5849	Cluster1
TCGA-P5-A736	Cluster1
TCGA-06-0174	Cluster2
TCGA-WY-A858	Cluster1
TCGA-DU-7009	Cluster1
TCGA-R8-A6MK	Cluster1
TCGA-FG-8181	Cluster1
TCGA-QH-A65Z	Cluster1
TCGA-E1-A7YV	Cluster1
TCGA-S9-A6U2	Cluster1
TCGA-CS-5395	Cluster1
TCGA-S9-A7R8	Cluster1
TCGA-06-5413	Cluster2
TCGA-FG-6689	Cluster1
TCGA-28-2514	Cluster2
TCGA-HT-8104	Cluster2
TCGA-DB-5280	Cluster1
TCGA-HT-7480	Cluster1
TCGA-QH-A86X	Cluster1
TCGA-06-2562	Cluster2
TCGA-HT-7874	Cluster1
TCGA-DU-7012	Cluster2
TCGA-32-1982	Cluster2
TCGA-06-0649	Cluster2
TCGA-TM-A84O	Cluster1
TCGA-FG-A713	Cluster1
TCGA-DU-6403	Cluster1
TCGA-28-5204	Cluster2
TCGA-19-4065	Cluster2
TCGA-S9-A7IX	Cluster2
TCGA-19-1389	Cluster2
TCGA-S9-A6WE	Cluster1
TCGA-R8-A73M	Cluster1
TCGA-HT-7485	Cluster1
TCGA-DB-A4XB	Cluster1
TCGA-HT-7688	Cluster1
TCGA-HW-7491	Cluster1
TCGA-DU-5871	Cluster1
TCGA-DU-A76O	Cluster1
TCGA-HT-7620	Cluster1
TCGA-RY-A83X	Cluster1
TCGA-06-0190	Cluster2
TCGA-06-2567	Cluster2
TCGA-DB-A4XH	Cluster1
TCGA-KT-A74X	Cluster1
TCGA-DH-5144	Cluster1
TCGA-16-1045	Cluster2
TCGA-FG-5965	Cluster1
TCGA-14-0736	Cluster2
TCGA-CS-6670	Cluster1
TCGA-QH-A6CS	Cluster1
TCGA-S9-A7QY	Cluster1
TCGA-DU-8165	Cluster2
TCGA-12-0821	Cluster2
TCGA-16-0846	Cluster2
TCGA-DB-A64S	Cluster1
TCGA-26-5133	Cluster2
TCGA-06-0125	Cluster2
TCGA-HT-7695	Cluster1
TCGA-27-2528	Cluster2
TCGA-HT-7603	Cluster1
TCGA-DU-8168	Cluster1
TCGA-E1-5322	Cluster1
TCGA-S9-A6WG	Cluster2
TCGA-DU-A6S3	Cluster1
TCGA-DU-A7TI	Cluster1
TCGA-FG-A70Y	Cluster1
TCGA-DB-A75K	Cluster1
TCGA-DB-5274	Cluster1
TCGA-14-0789	Cluster2
TCGA-HT-7474	Cluster1
TCGA-HT-7880	Cluster1
TCGA-HW-A5KJ	Cluster1
TCGA-P5-A737	Cluster1
TCGA-FG-7636	Cluster1
TCGA-27-2521	Cluster2
TCGA-TQ-A7RI	Cluster1
TCGA-DU-8161	Cluster1
TCGA-28-1753	Cluster2
TCGA-VM-A8CF	Cluster1
TCGA-VW-A7QS	Cluster1
TCGA-06-0130	Cluster2
TCGA-76-4931	Cluster2
TCGA-DU-5847	Cluster2
TCGA-CS-6188	Cluster2
TCGA-QH-A6CZ	Cluster1
TCGA-P5-A5EZ	Cluster1
TCGA-HW-7495	Cluster1
TCGA-32-2632	Cluster2
TCGA-DU-A5TS	Cluster1
TCGA-QH-A6XC	Cluster1
TCGA-HT-7481	Cluster1
TCGA-DU-7007	Cluster2
TCGA-DB-5281	Cluster1
TCGA-27-1832	Cluster2
TCGA-HT-7681	Cluster1
TCGA-TQ-A7RP	Cluster1
TCGA-TQ-A7RJ	Cluster1
TCGA-E1-A7Z2	Cluster1
TCGA-R8-A6ML	Cluster1
TCGA-QH-A6X9	Cluster1
TCGA-DH-A66B	Cluster1
TCGA-E1-A7Z6	Cluster1
TCGA-06-0745	Cluster2
TCGA-HT-7902	Cluster1
TCGA-DU-5855	Cluster1
TCGA-DU-7290	Cluster2
TCGA-S9-A89Z	Cluster2
TCGA-FG-6692	Cluster2
TCGA-27-1837	Cluster2
TCGA-E1-A7YW	Cluster2
TCGA-06-0138	Cluster2
TCGA-P5-A5F2	Cluster1
TCGA-VM-A8CD	Cluster1
TCGA-HT-7881	Cluster1
TCGA-TM-A7C5	Cluster1
TCGA-12-3653	Cluster2
TCGA-CS-4944	Cluster1
TCGA-RY-A847	Cluster1
TCGA-FG-8185	Cluster1
TCGA-FG-A87Q	Cluster1
TCGA-DB-A75L	Cluster2
TCGA-DU-6395	Cluster1
TCGA-P5-A5F6	Cluster2
TCGA-06-0646	Cluster2
TCGA-TM-A84B	Cluster2
TCGA-E1-A7YE	Cluster2
TCGA-02-2486	Cluster2
TCGA-02-0055	Cluster2
TCGA-TM-A84H	Cluster1
TCGA-TQ-A7RQ	Cluster1
TCGA-DU-7019	Cluster1
TCGA-VM-A8C9	Cluster1
TCGA-QH-A65S	Cluster1
TCGA-76-4925	Cluster2
TCGA-06-1804	Cluster2
TCGA-W9-A837	Cluster1
TCGA-TM-A84M	Cluster1
TCGA-S9-A6TY	Cluster1
TCGA-S9-A6U9	Cluster1
TCGA-14-0787	Cluster2
TCGA-76-4928	Cluster2
TCGA-DU-7006	Cluster2
TCGA-DU-7298	Cluster1
TCGA-HT-7469	Cluster2
TCGA-P5-A72Z	Cluster1
TCGA-E1-5304	Cluster2
TCGA-14-1823	Cluster2
TCGA-HT-8114	Cluster1
TCGA-DU-5870	Cluster1
TCGA-02-0047	Cluster2
TCGA-FG-7637	Cluster1
TCGA-S9-A7R1	Cluster1
TCGA-WY-A85B	Cluster1
TCGA-06-0878	Cluster2
TCGA-TQ-A7RR	Cluster1
TCGA-FG-8188	Cluster1
TCGA-DB-A64L	Cluster1
TCGA-HW-7490	Cluster1
TCGA-06-0644	Cluster2
TCGA-P5-A5F4	Cluster1
TCGA-FG-A60K	Cluster1
TCGA-28-5209	Cluster2
TCGA-CS-4942	Cluster1
TCGA-CS-5393	Cluster1
TCGA-HT-8109	Cluster1
TCGA-E1-A7YL	Cluster2
TCGA-E1-5319	Cluster1
TCGA-P5-A5EW	Cluster1
TCGA-QH-A6CW	Cluster1
TCGA-S9-A6WN	Cluster1
TCGA-DH-A7UR	Cluster1
TCGA-QH-A6CU	Cluster1
TCGA-HW-8321	Cluster1
TCGA-DU-6408	Cluster1
TCGA-HT-7879	Cluster1
TCGA-S9-A6WD	Cluster1
TCGA-DB-A64U	Cluster1
TCGA-DU-6405	Cluster2
TCGA-S9-A7IS	Cluster2
TCGA-DB-A64W	Cluster1
TCGA-HW-A5KM	Cluster1
TCGA-DU-7300	Cluster1
TCGA-TQ-A7RO	Cluster1
TCGA-E1-5302	Cluster1
TCGA-06-5418	Cluster2
TCGA-S9-A7R3	Cluster1
TCGA-P5-A72X	Cluster1
TCGA-DU-A5TT	Cluster2
TCGA-FG-A4MT	Cluster1
TCGA-HT-8012	Cluster1
TCGA-DU-A7TB	Cluster1
TCGA-06-0882	Cluster2
TCGA-28-5216	Cluster2
TCGA-06-0686	Cluster2
TCGA-HT-7479	Cluster1
TCGA-DU-8163	Cluster1
TCGA-06-5856	Cluster2
TCGA-QH-A65V	Cluster1
TCGA-S9-A7J2	Cluster1
TCGA-HT-7608	Cluster1
TCGA-27-2523	Cluster2
TCGA-DB-5279	Cluster1
TCGA-19-0957	Cluster1
TCGA-41-5651	Cluster2
TCGA-HT-A618	Cluster1
TCGA-FG-5963	Cluster1
TCGA-P5-A5EX	Cluster1
TCGA-FG-A710	Cluster1
TCGA-QH-A6CX	Cluster1
TCGA-DU-6400	Cluster1
TCGA-E1-5307	Cluster1
TCGA-FG-7634	Cluster1
TCGA-12-0618	Cluster2
TCGA-HT-7483	Cluster1
TCGA-32-2634	Cluster2
TCGA-41-3915	Cluster2
TCGA-DU-A6S8	Cluster1
TCGA-06-2559	Cluster2
TCGA-27-1834	Cluster2
TCGA-06-5410	Cluster2
TCGA-P5-A72W	Cluster1
TCGA-E1-A7Z4	Cluster1
TCGA-19-5960	Cluster2
TCGA-HT-7605	Cluster1
TCGA-DB-A64X	Cluster1
TCGA-HT-A74L	Cluster1
TCGA-06-0141	Cluster2
TCGA-32-5222	Cluster2
TCGA-15-1444	Cluster1
TCGA-HT-A615	Cluster1
TCGA-HT-7611	Cluster1
TCGA-HT-7693	Cluster2
TCGA-26-5135	Cluster2
TCGA-CS-6186	Cluster1
TCGA-TM-A84F	Cluster1
TCGA-TQ-A7RG	Cluster1
TCGA-P5-A780	Cluster1
TCGA-HT-7604	Cluster1
TCGA-DU-6397	Cluster1
TCGA-TM-A84S	Cluster1
TCGA-26-5134	Cluster2
TCGA-76-4927	Cluster2
TCGA-06-0210	Cluster2
TCGA-19-1390	Cluster2
TCGA-DU-5852	Cluster2
TCGA-HW-8319	Cluster1
TCGA-HT-A614	Cluster1
TCGA-FG-6690	Cluster1
TCGA-27-1835	Cluster2
TCGA-FG-7638	Cluster1
TCGA-P5-A5F0	Cluster1
TCGA-R8-A6MO	Cluster1
TCGA-DB-5273	Cluster1
TCGA-32-2638	Cluster2
TCGA-E1-A7YI	Cluster2
TCGA-FG-8187	Cluster1
TCGA-E1-A7YY	Cluster1
TCGA-HT-7473	Cluster1
TCGA-RY-A845	Cluster1
TCGA-06-0129	Cluster2
TCGA-DU-5872	Cluster1
TCGA-P5-A77X	Cluster1
TCGA-DH-A66D	Cluster1
TCGA-HW-7486	Cluster1
TCGA-IK-7675	Cluster2
TCGA-HT-7689	Cluster1
TCGA-DH-A669	Cluster1
TCGA-19-2619	Cluster2
TCGA-E1-A7YJ	Cluster2
TCGA-S9-A6TW	Cluster1
TCGA-S9-A6TU	Cluster1
TCGA-DH-5143	Cluster1
TCGA-DU-7304	Cluster1
TCGA-06-0132	Cluster1
TCGA-HT-7873	Cluster2
TCGA-E1-A7YQ	Cluster2
TCGA-DU-7011	Cluster1
TCGA-14-0790	Cluster2
TCGA-06-2561	Cluster2
TCGA-28-2513	Cluster2
TCGA-WY-A85C	Cluster2
TCGA-FG-6688	Cluster1
TCGA-DU-A76K	Cluster1
TCGA-HT-A74J	Cluster1
TCGA-VM-A8CH	Cluster1
TCGA-14-1402	Cluster2
TCGA-TQ-A7RW	Cluster1
TCGA-HW-7487	Cluster1
TCGA-DB-A64O	Cluster1
TCGA-DU-6404	Cluster2
TCGA-S9-A6UB	Cluster1
TCGA-S9-A6TX	Cluster1
TCGA-DH-A66F	Cluster1
TCGA-FG-7643	Cluster1
TCGA-WY-A85D	Cluster1
TCGA-DU-6392	Cluster1
TCGA-DU-7292	Cluster1
TCGA-DB-A75O	Cluster1
TCGA-FG-8186	Cluster1
TCGA-06-0747	Cluster2
TCGA-DU-6396	Cluster1
TCGA-P5-A77W	Cluster1
TCGA-27-1830	Cluster2
TCGA-06-5414	Cluster2
TCGA-06-0645	Cluster2
TCGA-P5-A731	Cluster1
TCGA-28-5220	Cluster2
TCGA-02-2485	Cluster2
TCGA-HT-A61A	Cluster1
TCGA-FG-8182	Cluster1
TCGA-RY-A840	Cluster1
TCGA-S9-A6U1	Cluster1
TCGA-WY-A859	Cluster1
TCGA-TM-A84C	Cluster2
TCGA-76-4926	Cluster2
TCGA-DU-7008	Cluster1
TCGA-06-2563	Cluster2
TCGA-DB-A4XA	Cluster1
TCGA-DU-7013	Cluster2
TCGA-HT-A5RC	Cluster2
TCGA-E1-5305	Cluster1
TCGA-DB-A64R	Cluster1
TCGA-DU-6406	Cluster2
TCGA-DB-A4XG	Cluster1
TCGA-E1-5311	Cluster1
TCGA-S9-A6WM	Cluster2
TCGA-14-0817	Cluster2
TCGA-DU-A7TC	Cluster1
TCGA-S9-A7J0	Cluster2
TCGA-27-2519	Cluster2
TCGA-41-2572	Cluster2
TCGA-DU-6402	Cluster2
TCGA-28-5215	Cluster2
TCGA-06-0171	Cluster2
TCGA-FG-7641	Cluster1
TCGA-06-5416	Cluster2
TCGA-DU-6394	Cluster1
TCGA-TM-A84T	Cluster1
TCGA-HT-7607	Cluster1
TCGA-DU-A7TD	Cluster2
TCGA-DU-7294	Cluster1
TCGA-28-5218	Cluster2
TCGA-DB-A64Q	Cluster1
TCGA-14-1829	Cluster2
TCGA-HT-A617	Cluster2
TCGA-P5-A733	Cluster1
TCGA-06-5412	Cluster2
TCGA-S9-A6WH	Cluster1
TCGA-HT-8018	Cluster1
TCGA-DH-A7UU	Cluster1
TCGA-E1-A7YO	Cluster1
TCGA-S9-A6TZ	Cluster1
TCGA-DU-A6S7	Cluster1
TCGA-TM-A7C4	Cluster1
TCGA-19-2629	Cluster1
TCGA-12-0616	Cluster2
TCGA-DB-A4XE	Cluster1
TCGA-HT-7602	Cluster1
TCGA-26-5132	Cluster2
TCGA-TM-A7CA	Cluster1
TCGA-DU-A6S6	Cluster1
TCGA-DU-5854	Cluster1
TCGA-QH-A6CY	Cluster1
TCGA-P5-A5EY	Cluster1
TCGA-06-0744	Cluster2
TCGA-HT-8563	Cluster2
TCGA-HT-7606	Cluster1
TCGA-06-5858	Cluster2
TCGA-06-5417	Cluster2
TCGA-CS-6669	Cluster1
TCGA-HT-A616	Cluster1
TCGA-DB-A64P	Cluster1
TCGA-VW-A8FI	Cluster2
TCGA-DU-A6S2	Cluster1
TCGA-26-5136	Cluster2
TCGA-HT-8110	Cluster2
TCGA-DU-5874	Cluster1
TCGA-HT-8010	Cluster1
TCGA-HW-A5KK	Cluster1
TCGA-DU-7306	Cluster1
TCGA-QH-A6X3	Cluster1
TCGA-DB-A75P	Cluster1
TCGA-12-5295	Cluster2
TCGA-DH-5141	Cluster1
TCGA-DU-7302	Cluster1
TCGA-DU-6407	Cluster2
