# Supplementary material for: Comprehensive analysis of histone deacetylases genes in the prognosis and immune infiltration of glioma patients
Source: Aging (Albany NY). 2022 May 11;14(9):4050–68. doi: 10.18632/aging.204071 (PMC9134955; doi:10.18632/aging.204071)
Supplement: Supplementary Table 4 [file aging-14-204071-s004.xlsx]

## Sheet: Supplementary Table 4
Supplementary Table 4. Differential expressed genes between high-and low-risk group.
gene	lowMean	highMean	logFC	pValue	FDR
AC109439.2	2.43403	0.278631	-3.12692	1.4608e-62	4.5999e-61
LHX5	1.85702	0.218905	-3.08461	9.69313e-40	5.37521e-39
AC023421.1	1.88873	0.226784	-3.05802	7.48558e-41	4.40205e-40
PRLHR	5.09861	0.614266	-3.05317	3.51909e-72	4.53233e-70
LHX5-AS1	4.97285	0.610219	-3.02667	5.30729e-44	3.68673e-43
HMGA1P7	2.07451	0.281753	-2.88027	8.44631e-62	2.46425e-60
TRIM67	7.68185	1.06364	-2.85244	6.82686e-39	3.64984e-38
SPHKAP	5.93397	0.829197	-2.83921	6.8619e-71	6.67332e-69
FSTL5	3.35537	0.475235	-2.81976	7.88084e-62	2.3087e-60
HPSE2	8.14805	1.15968	-2.81273	1.79452e-61	5.09016e-60
AC062021.1	10.7599	1.53822	-2.80633	1.35127e-58	2.85343e-57
AL122019.1	3.19367	0.472624	-2.75645	4.11853e-50	4.19961e-49
GRIN3A	2.49494	0.369259	-2.7563	7.46597e-52	8.66344e-51
CACNG2	3.83763	0.597796	-2.68249	3.47188e-57	6.42927e-56
CSMD3	2.55995	0.419057	-2.6109	1.42471e-78	8.48653e-76
AC053503.1	11.9898	1.97584	-2.60127	9.64941e-68	5.79613e-66
F5	5.09716	0.849465	-2.58507	6.65721e-40	3.71909e-39
SELL	44.3755	7.65536	-2.53522	1.88658e-34	8.17536e-34
AL049749.1	3.29009	0.571894	-2.5243	1.6401e-55	2.55135e-54
AL022313.4	10.0704	1.82025	-2.46791	1.87294e-56	3.21822e-55
MIR6071	4.42722	0.811036	-2.44856	1.14631e-52	1.42254e-51
NEUROD6	1.91089	0.352133	-2.44005	1.18379e-15	2.35473e-15
AC074286.1	1.57351	0.294622	-2.41705	4.46388e-73	6.57894e-71
SSTR1	5.02255	0.943943	-2.41165	3.1145e-65	1.31732e-63
USH1C	12.9719	2.48161	-2.38604	5.81411e-52	6.79628e-51
SFRP2	69.0404	13.2354	-2.38303	1.66382e-46	1.33704e-45
GRP	2.80361	0.543633	-2.36658	0.000414226	0.000517819
AMER3	2.47856	0.481486	-2.36394	3.67194e-54	5.10146e-53
PARP4P3	1.73982	0.343997	-2.33847	1.57794e-20	3.80344e-20
SVOP	6.4563	1.28704	-2.32665	5.28851e-43	3.47288e-42
CALN1	7.47594	1.51436	-2.30354	1.17257e-58	2.4871e-57
DACH2	1.89234	0.383382	-2.30332	1.4795e-50	1.55521e-49
KCNIP2	23.062	4.68262	-2.30013	1.70889e-60	4.36255e-59
GLRA3	1.70834	0.35406	-2.27053	1.46879e-57	2.81472e-56
XKR7	1.85811	0.385387	-2.26946	2.1483e-45	1.60965e-44
RGR	5.37722	1.13198	-2.24801	6.99271e-58	1.37318e-56
CUX2	3.35505	0.708701	-2.24309	8.06688e-58	1.57762e-56
TNR	78.5279	16.7915	-2.22547	1.58464e-69	1.19863e-67
LINC00836	5.56461	1.19142	-2.2236	5.15848e-55	7.64203e-54
TPTEP1	8.92689	1.91517	-2.22069	6.50255e-24	1.78736e-23
AC012213.4	2.85217	0.615178	-2.21298	8.41794e-56	1.33123e-54
SSTR2	6.85219	1.48992	-2.20133	3.02074e-59	6.72655e-58
WSCD2	2.11176	0.46064	-2.19674	1.04691e-38	5.53706e-38
NEFM	14.7907	3.23321	-2.19365	5.42465e-17	1.13015e-16
INA	33.8389	7.40804	-2.19152	2.6413e-55	4.02559e-54
PTPRT	5.94906	1.3055	-2.18806	2.33394e-64	8.92139e-63
GABRB2	3.57033	0.787581	-2.18056	1.82846e-16	3.73852e-16
PCDHGA3	2.045	0.455957	-2.16513	1.07714e-18	2.417e-18
CRTAC1	25.4421	5.68429	-2.16217	2.16938e-71	2.24736e-69
GALNT13	29.143	6.51358	-2.16163	1.73853e-76	5.77999e-74
CDH18	2.44574	0.546822	-2.16113	1.05203e-54	1.52844e-53
GABRG2	9.66078	2.16063	-2.16069	4.22973e-34	1.80394e-33
AL118505.1	11.2035	2.52087	-2.15196	8.98056e-64	3.21769e-62
MYT1L	3.19402	0.720171	-2.14896	2.38903e-30	8.59426e-30
AC122707.1	2.70198	0.61054	-2.14586	4.6328e-46	3.61126e-45
CHGB	35.8842	8.16437	-2.13593	1.39258e-56	2.42488e-55
SCRT1	9.41026	2.14949	-2.13024	1.2433e-53	1.67208e-52
CBLN2	1.99442	0.457937	-2.12275	1.4425e-40	8.34897e-40
HRH3	4.82392	1.1095	-2.12029	5.51739e-48	4.86292e-47
SHANK2	2.28125	0.525205	-2.11887	1.49542e-68	1.0132e-66
KCNJ11	10.2258	2.38786	-2.09842	1.05843e-52	1.31806e-51
GRIN1	17.724	4.14671	-2.09566	1.64087e-37	8.22504e-37
KCNK3	4.44013	1.04354	-2.08912	5.42446e-47	4.48254e-46
ABCC8	7.69566	1.80963	-2.08835	3.29224e-52	3.94848e-51
KHDRBS2	1.90908	0.449278	-2.0872	2.62776e-56	4.44048e-55
SLC22A6	2.47763	0.583903	-2.08516	2.55086e-60	6.37536e-59
RIMS2	2.47385	0.588154	-2.07249	2.91033e-51	3.19801e-50
CDHR1	9.41494	2.24661	-2.0672	1.02782e-70	9.54138e-69
RASL10A	16.7714	4.01505	-2.06251	1.60684e-62	5.02655e-61
NOG	10.7354	2.58227	-2.05567	1.16688e-65	5.27903e-64
SNAP91	17.7737	4.28448	-2.05255	6.91651e-71	6.68098e-69
TMEM151B	11.6175	2.80228	-2.05163	9.39249e-52	1.08025e-50
ATP2B3	2.7644	0.667061	-2.05107	6.35754e-34	2.6858e-33
AL355916.1	9.87754	2.39149	-2.04624	5.54285e-33	2.24541e-32
HCN1	1.72995	0.418856	-2.0462	2.31705e-16	4.72599e-16
GABRA1	6.82412	1.66561	-2.03459	1.74888e-16	3.57785e-16
AC027130.1	2.16155	0.53143	-2.02412	1.00161e-60	2.62252e-59
FAM19A2	1.93979	0.47702	-2.02378	4.06229e-47	3.37642e-46
NSG2	67.4858	16.6082	-2.02269	8.42903e-57	1.50439e-55
FAM133A	3.26898	0.80638	-2.01931	4.57878e-71	4.64243e-69
RTP5	15.9039	3.95858	-2.00632	6.46394e-58	1.27636e-56
SV2B	4.82076	1.20282	-2.00284	9.52842e-15	1.82647e-14
KCNC2	2.45022	0.611708	-2.002	3.40165e-20	8.07136e-20
AC092162.3	1.65872	0.414434	-2.00086	1.99564e-46	1.59384e-45
SCN3B	12.5731	3.15745	-1.99351	2.53908e-47	2.14531e-46
GDF10	4.91341	1.23452	-1.99277	6.00288e-49	5.65703e-48
LINC02058	1.59732	0.401465	-1.99231	3.8895e-48	3.46013e-47
FAM155A	6.14808	1.55316	-1.98493	9.18714e-67	4.91908e-65
JPH3	13.7861	3.49409	-1.98023	9.68091e-64	3.45996e-62
SLC6A7	1.86131	0.472216	-1.9788	4.87167e-10	7.82005e-10
UNC79	4.74001	1.20264	-1.97868	3.15571e-60	7.79172e-59
SHISAL1	5.90576	1.49881	-1.97831	1.7242e-47	1.47071e-46
LRTM2	2.52208	0.640464	-1.97743	3.93023e-36	1.84098e-35
RAB3C	5.83075	1.48399	-1.9742	2.24944e-39	1.22741e-38
INSYN2B	1.95722	0.498248	-1.97387	2.09716e-54	2.96548e-53
GABRB3	7.289	1.856	-1.97352	2.49071e-62	7.62466e-61
ZDHHC22	45.7349	11.6765	-1.96968	5.54948e-72	6.66684e-70
CNNM1	1.73446	0.443235	-1.96835	4.46004e-39	2.40697e-38
MPPED1	3.06263	0.783748	-1.96631	2.60771e-16	5.30749e-16
RASGRF1	5.21949	1.33875	-1.96302	1.54676e-51	1.75496e-50
SMOC1	186.221	47.9939	-1.95609	1.03592e-62	3.30568e-61
SLC7A14	5.53408	1.43226	-1.95005	1.74602e-51	1.96699e-50
AC124312.2	8.08861	2.09752	-1.94721	4.52013e-58	9.0758e-57
CACNG3	4.8178	1.25012	-1.94631	5.78011e-18	1.25371e-17
ST8SIA3	5.69312	1.48008	-1.94354	3.07396e-48	2.75692e-47
SLC17A8	2.50423	0.652242	-1.94089	7.11492e-12	1.22312e-11
CBLN1	3.95893	1.03146	-1.94043	1.01844e-59	2.39862e-58
2021-03-04	3.98783	1.04224	-1.93591	1.66858e-30	6.04816e-30
BMP2	22.7671	5.9737	-1.93026	3.74542e-62	1.12725e-60
CNTNAP2	6.38694	1.68276	-1.92429	4.21242e-53	5.42041e-52
CAMK2A	37.3827	9.85971	-1.92275	7.90465e-11	1.30959e-10
GFRA1	7.366	1.9585	-1.91113	4.89041e-58	9.73723e-57
HTR2A	2.25293	0.600149	-1.90841	1.26125e-42	8.13669e-42
SLC25A21-AS1	2.65814	0.708367	-1.90785	6.75308e-65	2.75048e-63
DDN	14.7975	3.94393	-1.90765	1.41001e-20	3.40498e-20
ATP8A2	2.45625	0.655714	-1.90532	5.67262e-34	2.40355e-33
DOK6	3.44305	0.920126	-1.90378	1.74237e-59	3.98543e-58
L1CAM	15.9082	4.27621	-1.89537	1.72529e-29	5.95911e-29
SLC25A48	6.31984	1.70108	-1.89343	1.16247e-47	1.00233e-46
ETNPPL	58.7939	15.8622	-1.89007	1.85108e-47	1.57612e-46
HAR1A	1.72171	0.46481	-1.88913	4.52695e-49	4.30015e-48
ELFN2	7.1539	1.93597	-1.88567	2.61504e-65	1.12266e-63
CSDC2	32.8608	8.91985	-1.88128	8.2416e-58	1.60959e-56
PACSIN1	20.8317	5.66315	-1.8791	1.59982e-16	3.27524e-16
AC104051.2	16.4974	4.51151	-1.87055	3.81682e-17	8.01723e-17
SYT4	9.22135	2.5381	-1.86123	4.85154e-23	1.29158e-22
REPS2	5.65467	1.55982	-1.85807	5.14743e-70	4.22918e-68
SLC12A5	7.25347	2.00981	-1.85161	7.52127e-21	1.83865e-20
CPLX2	37.1571	10.2992	-1.85111	1.16204e-35	5.33649e-35
AC008991.1	2.08117	0.579299	-1.84501	4.14931e-42	2.6097e-41
ADARB2	3.90694	1.08848	-1.84373	2.32938e-52	2.81971e-51
TMEM100	42.091	11.7411	-1.84195	5.19452e-55	7.68746e-54
GNAL	4.65005	1.29712	-1.84194	4.58383e-68	2.8868e-66
IQSEC3	5.05363	1.4167	-1.83478	8.58148e-29	2.88389e-28
CHRM1	7.03628	1.97527	-1.83276	1.91779e-34	8.29803e-34
PRKCG	7.12005	2.00145	-1.83085	1.46694e-18	3.26759e-18
AL513217.1	2.04131	0.574279	-1.82967	1.67348e-43	1.13009e-42
WNT7B	6.4515	1.81646	-1.8285	1.00601e-56	1.77774e-55
CHGA	27.2214	7.67666	-1.82619	1.12469e-37	5.67546e-37
VSNL1	34.4307	9.7136	-1.82562	1.1536e-08	1.75839e-08
SCG3	218.894	61.8216	-1.82405	6.5394e-69	4.62808e-67
KCNIP3	13.3434	3.79404	-1.81432	7.13933e-71	6.80426e-69
MAL2	3.62242	1.03004	-1.81425	5.57602e-13	1.00069e-12
ARPP21	6.99784	1.99103	-1.8134	2.44371e-73	3.92531e-71
CREG2	6.49973	1.85698	-1.80742	3.49513e-11	5.86323e-11
NMNAT2	14.9629	4.28226	-1.80495	3.04676e-56	5.07652e-55
GABRD	17.8884	5.1315	-1.80157	2.01229e-39	1.10221e-38
GABRG1	6.53743	1.87594	-1.80111	1.45265e-54	2.08088e-53
SULT4A1	17.3031	4.97143	-1.7993	1.40747e-14	2.68248e-14
CNTN3	3.49307	1.00546	-1.79664	5.25304e-47	4.34592e-46
PDE2A	13.6882	3.94322	-1.79549	1.69206e-61	4.8283e-60
RBFOX1	4.09327	1.17962	-1.79493	1.08042e-14	2.06631e-14
CABP1	4.81606	1.38952	-1.79327	1.24421e-34	5.42624e-34
RNF219-AS1	1.81196	0.52421	-1.78933	8.21654e-46	6.30508e-45
NRSN1	12.9605	3.75457	-1.7874	1.29557e-49	1.27383e-48
RGS7BP	3.71443	1.07932	-1.78302	1.38856e-35	6.3462e-35
MDGA2	1.91793	0.557519	-1.78246	2.03065e-62	6.28359e-61
AC021739.3	2.91786	0.849405	-1.78038	5.96794e-40	3.34317e-39
DGCR10	1.79294	0.523287	-1.77665	1.61821e-52	1.98916e-51
SUSD5	9.73195	2.84131	-1.77617	3.76082e-41	2.24487e-40
DGCR9	3.33123	0.9733	-1.7751	1.00387e-59	2.3682e-58
GDNF-AS1	1.5142	0.443007	-1.77316	6.76659e-55	9.96243e-54
MCF2	1.5171	0.444207	-1.77202	1.59135e-48	1.44812e-47
CACNA1B	1.83649	0.537782	-1.77186	6.33527e-33	2.55845e-32
RFPL1S	2.92588	0.857405	-1.77082	1.91376e-27	6.05559e-27
MMD2	18.283	5.36116	-1.76989	1.35257e-44	9.68753e-44
SGSM1	3.42523	1.0066	-1.76671	3.21064e-65	1.35396e-63
C1QL3	2.43111	0.714911	-1.76578	1.08278e-07	1.58467e-07
GABRA3	10.2655	3.02011	-1.76513	7.63084e-53	9.6115e-52
KCNB1	8.69327	2.55993	-1.7638	9.04769e-74	1.55838e-71
GABBR1	78.2869	23.2286	-1.75287	3.71611e-73	5.65166e-71
SYT1	31.3877	9.31435	-1.75267	2.12179e-12	3.72551e-12
FERMT1	19.579	5.81092	-1.75247	2.99186e-53	3.89896e-52
SLC6A17	8.37249	2.49014	-1.74943	5.61327e-16	1.12945e-15
KCNJ9	16.8621	5.01628	-1.74909	3.00415e-56	5.02896e-55
SHD	54.4869	16.2161	-1.74849	8.10786e-55	1.18639e-53
FAM163B	16.6524	4.97108	-1.7441	9.59705e-34	4.01638e-33
PCDH15	5.42702	1.6207	-1.74354	1.08767e-52	1.35329e-51
SH3GL2	41.4398	12.3827	-1.74269	1.02033e-63	3.61951e-62
AJAP1	2.27212	0.679547	-1.7414	5.25134e-45	3.84596e-44
AC005696.4	7.74499	2.32176	-1.73805	1.32511e-58	2.80649e-57
SLC8A2	7.33788	2.20059	-1.73747	1.696e-46	1.36137e-45
CHRNA4	2.65497	0.797802	-1.7346	1.23911e-59	2.87103e-58
HMGCLL1	1.57736	0.474594	-1.73275	3.91455e-43	2.58606e-42
OLFM3	1.57404	0.474314	-1.73056	8.61044e-11	1.42421e-10
MYH7	8.47921	2.55629	-1.72988	2.76135e-39	1.50329e-38
ATOH8	15.0245	4.53411	-1.72843	4.46282e-59	9.80038e-58
SCN2B	7.1299	2.15331	-1.72733	4.93162e-45	3.61737e-44
SYT13	7.7469	2.34586	-1.7235	1.64532e-20	3.96252e-20
AC015540.1	3.70105	1.12147	-1.72254	2.13911e-58	4.42557e-57
RBFOX3	2.58179	0.783908	-1.71961	2.95295e-24	8.24196e-24
MT-TF	19.7679	6.00805	-1.71819	4.40596e-40	2.48276e-39
RNU6-277P	2.52379	0.768206	-1.71602	2.0261e-44	1.43748e-43
FRRS1L	6.77061	2.07429	-1.70667	6.29513e-46	4.86987e-45
SNAP25	124.69	38.2027	-1.7066	2.60211e-21	6.49551e-21
HECW1	1.471	0.45181	-1.70301	2.02971e-44	1.43932e-43
PPP4R4	2.54563	0.78189	-1.70299	1.9756e-38	1.03115e-37
MIR7158	2.50149	0.770127	-1.69962	9.37048e-36	4.3213e-35
DUSP9	2.57686	0.795221	-1.69619	1.51036e-48	1.37793e-47
DSCAML1	11.4267	3.52786	-1.69554	4.03355e-62	1.20888e-60
SOX8	212.922	65.8561	-1.69293	6.73369e-59	1.45635e-57
DLGAP1	10.7703	3.34066	-1.68886	5.38653e-64	1.97451e-62
UNC5A	10.089	3.13772	-1.685	2.14196e-55	3.28557e-54
VEPH1	3.40904	1.06148	-1.68329	1.1024e-21	2.79431e-21
JPH4	29.2984	9.16881	-1.67601	2.34878e-67	1.33246e-65
AC124854.1	1.57243	0.493129	-1.67296	4.87523e-48	4.31022e-47
ARHGAP44	2.3894	0.750481	-1.67076	3.21723e-48	2.8818e-47
CELF4	7.07196	2.22195	-1.67029	1.45248e-30	5.2823e-30
IGFN1	2.45651	0.772374	-1.66924	1.68666e-36	8.04824e-36
LINC02440	3.53212	1.11446	-1.66418	2.98958e-47	2.51406e-46
LUZP2	17.6759	5.58403	-1.6624	5.35778e-51	5.77638e-50
BRINP1	16.0101	5.0662	-1.66	1.61345e-50	1.68981e-49
RIMS1	1.72664	0.548256	-1.65504	2.28777e-29	7.86768e-29
IFITM10	18.1872	5.77736	-1.65444	7.73999e-65	3.10817e-63
CCDC85A	1.60508	0.510142	-1.65368	1.0822e-51	1.23967e-50
AMZ1	2.75669	0.876369	-1.65333	5.36087e-52	6.29738e-51
CLVS2	2.60698	0.829525	-1.65202	1.06747e-29	3.72389e-29
MEGF11	9.52618	3.03565	-1.64989	2.72889e-49	2.63063e-48
TMEM130	17.136	5.46686	-1.64824	2.75287e-19	6.31803e-19
ATP6V1G2	64.7506	20.6583	-1.64818	5.78602e-73	8.27169e-71
KLRC4	2.30627	0.7361	-1.64759	1.06174e-46	8.64881e-46
GALNT9	4.50988	1.44081	-1.64621	1.21378e-43	8.27081e-43
CCKBR	1.78107	0.570849	-1.64156	2.61198e-13	4.74509e-13
CHD5	5.11942	1.64384	-1.63891	2.32971e-24	6.52539e-24
DUSP26	30.3326	9.78876	-1.63167	4.43646e-73	6.57894e-71
ARFGEF3	7.63557	2.46736	-1.62977	5.84754e-65	2.4022e-63
FLJ16779	32.4466	10.4949	-1.62837	4.18125e-51	4.53873e-50
GPR158	10.1822	3.32137	-1.61619	1.78306e-62	5.55352e-61
FLRT1	9.22922	3.01293	-1.61504	9.51315e-69	6.66666e-67
KCNJ3	3.0461	0.99455	-1.61485	9.66574e-35	4.23739e-34
PHYHIPL	84.606	27.7117	-1.61027	3.87706e-78	2.13179e-75
DLL3	113.41	37.1621	-1.60964	6.12706e-43	4.01616e-42
LCNL1	5.00447	1.64035	-1.60922	1.59563e-35	7.26931e-35
FAM19A1	2.08641	0.68406	-1.60883	6.52364e-19	1.47543e-18
AC124312.4	1.47249	0.483195	-1.60758	2.61277e-52	3.14856e-51
CPEB3	3.3353	1.09507	-1.60679	4.43568e-71	4.52946e-69
LRRTM4	4.40821	1.45016	-1.60399	2.72202e-56	4.58352e-55
LINC00689	9.9022	3.26033	-1.60273	1.37975e-24	3.90669e-24
MTMR7	2.90957	0.960501	-1.59895	3.69855e-59	8.15963e-58
UNC80	4.0924	1.35353	-1.59622	6.60328e-56	1.06547e-54
TMEM155	2.47033	0.817812	-1.59486	3.46689e-06	4.76793e-06
KLRC3	2.50299	0.829024	-1.59416	5.69885e-48	5.01431e-47
LINC00672	12.2622	4.065	-1.59289	2.58439e-63	8.77586e-62
KCNQ5	3.81884	1.26863	-1.58986	6.29513e-46	4.86987e-45
FUT9	5.92359	1.97063	-1.58782	1.21741e-67	7.19175e-66
CA10	13.8154	4.60415	-1.58528	1.04362e-42	6.76015e-42
NAP1L2	16.1093	5.36978	-1.58496	3.3624e-56	5.58292e-55
MIR124-2HG	2.07173	0.690778	-1.58454	1.16045e-40	6.74382e-40
CACNA2D3	2.74452	0.915612	-1.58374	8.22461e-36	3.80145e-35
PRKCB	10.7832	3.59826	-1.58341	4.57061e-35	2.03239e-34
PHYHIP	29.6842	9.921	-1.58114	2.23853e-20	5.36048e-20
TPTE2P1	1.71395	0.572841	-1.58112	1.22987e-54	1.7724e-53
VIP	1.70064	0.569483	-1.57835	1.63872e-10	2.67954e-10
PSD	21.9527	7.35444	-1.57771	2.71099e-49	2.61513e-48
SYN3	1.63803	0.548848	-1.57748	7.51873e-46	5.78825e-45
SCD	312.626	104.932	-1.57498	8.7998e-66	4.09778e-64
TUNAR	1.59259	0.5347	-1.57458	1.96413e-19	4.53621e-19
LINC00634	22.2063	7.47109	-1.57158	1.6475e-74	3.31729e-72
BSN	6.17258	2.08456	-1.56613	1.46158e-45	1.10496e-44
LINC00599	4.47602	1.51275	-1.56504	1.28094e-35	5.86745e-35
LRFN5	1.80751	0.611097	-1.56453	1.91661e-35	8.68457e-35
PLCB1	6.62918	2.24278	-1.56354	7.7583e-74	1.36929e-71
CHRM4	2.29281	0.776039	-1.56292	3.39251e-40	1.92153e-39
GAD2	3.2957	1.11633	-1.56182	2.29874e-10	3.74079e-10
PAK5	2.8442	0.963592	-1.56153	8.72042e-52	1.007e-50
FAM13C	6.77023	2.29381	-1.56146	8.49784e-76	2.24972e-73
SEZ6L	61.8744	21.0373	-1.55639	9.59537e-44	6.56656e-43
NALCN	7.2317	2.46014	-1.5556	1.07762e-76	4.05411e-74
SLITRK5	2.04204	0.694693	-1.55556	2.53133e-70	2.17999e-68
TUB	25.6324	8.72612	-1.55456	6.71593e-78	3.42896e-75
KLRC2	12.9422	4.41828	-1.55053	1.76943e-42	1.13282e-41
STOX1	9.3711	3.20409	-1.5483	7.80051e-37	3.78277e-36
ATCAY	53.5161	18.3033	-1.54787	4.98992e-47	4.13302e-46
MIR9-3HG	19.626	6.71654	-1.54698	2.93286e-55	4.46045e-54
PWAR6	17.0404	5.83462	-1.54625	7.76844e-68	4.76642e-66
RNU6-529P	26.3423	9.04375	-1.54239	3.37352e-51	3.68433e-50
HLF	9.12998	3.13715	-1.54116	4.56947e-61	1.24905e-59
GDA	4.45386	1.53133	-1.54027	4.32938e-07	6.1868e-07
ATP8A1	11.2221	3.88429	-1.53062	5.29861e-65	2.19562e-63
UNC13A	11.6747	4.04987	-1.52744	9.29232e-45	6.69234e-44
NEGR1	3.83382	1.33051	-1.52681	1.4398e-44	1.02968e-43
LINC02593	2.59754	0.904084	-1.52261	3.24037e-51	3.54704e-50
ACTL6B	13.7861	4.79883	-1.52246	2.19731e-39	1.19988e-38
SLITRK1	6.21538	2.16527	-1.52129	1.24936e-49	1.23008e-48
PCDHGA5	1.41115	0.492015	-1.5201	7.83413e-06	1.05897e-05
SHISA7	8.91013	3.10939	-1.51881	9.68065e-60	2.2913e-58
MAP7D2	3.92951	1.37336	-1.51664	9.59242e-06	1.29115e-05
GRIA2	28.7912	10.0625	-1.51664	3.65118e-60	8.90739e-59
CLEC2L	2.56891	0.897971	-1.51642	9.31419e-15	1.78708e-14
TMEM271	5.03954	1.76917	-1.51022	4.30848e-33	1.75481e-32
NGB	1.90743	0.670059	-1.50927	0.000174907	0.000223017
NEFH	7.04258	2.47555	-1.50835	3.19774e-10	5.17312e-10
PAK3	4.45265	1.56593	-1.50764	5.52189e-45	4.03377e-44
GRIA4	23.1258	8.13582	-1.50714	9.42404e-65	3.73202e-63
CAMK4	2.35804	0.832809	-1.50153	6.90234e-17	1.43216e-16
MKX	2.55787	0.90372	-1.501	2.68997e-43	1.79031e-42
AL354798.1	2.18178	0.772511	-1.49788	1.64973e-42	1.05855e-41
SPTBN2	16.1908	5.73872	-1.49638	2.7569e-58	5.64652e-57
PPP2R2C	10.0387	3.56059	-1.49539	2.95658e-29	1.00973e-28
GPR27	9.91135	3.5232	-1.4922	1.06645e-44	7.66127e-44
CYS1	2.72127	0.967672	-1.49169	1.61184e-54	2.2974e-53
RGS4	12.5714	4.47913	-1.48885	0.00976985	0.0113001
ADGRV1	6.93325	2.4705	-1.48873	3.46393e-37	1.70525e-36
GABRA5	3.80456	1.35614	-1.48822	2.21832e-12	3.89308e-12
SLC4A10	4.22796	1.50937	-1.48602	1.32115e-10	2.1692e-10
AC009041.2	89.4703	31.9445	-1.48584	1.64305e-49	1.60554e-48
HPCAL4	21.5633	7.71721	-1.48242	4.53638e-32	1.76372e-31
RUNDC3A	33.287	11.9412	-1.47901	2.85962e-56	4.79826e-55
DNM3	9.17797	3.29401	-1.47833	3.6678e-70	3.10266e-68
GDAP1L1	20.6296	7.41184	-1.47681	1.28953e-51	1.47245e-50
PHF24	6.77788	2.43934	-1.47434	7.67465e-11	1.27208e-10
CASKIN1	8.16036	2.93804	-1.47378	4.2685e-58	8.61899e-57
SHANK1	4.61022	1.66159	-1.47227	3.03842e-30	1.08975e-29
LINC01602	11.1096	4.00511	-1.47189	1.11656e-28	3.72604e-28
SYT16	2.02526	0.73049	-1.47117	1.34109e-20	3.24293e-20
PWAR5	1.69916	0.613043	-1.47076	5.40958e-50	5.45768e-49
SLC17A7	31.0126	11.1954	-1.46995	2.53134e-11	4.26695e-11
NEFL	28.8383	10.4126	-1.46966	7.35412e-07	1.04269e-06
NEU4	18.7193	6.76051	-1.46932	2.42624e-41	1.46352e-40
PVALB	2.96004	1.06958	-1.46858	2.48026e-11	4.18184e-11
FAIM2	81.5692	29.4792	-1.46833	9.22075e-69	6.49359e-67
MN1	6.25925	2.26329	-1.46757	4.69422e-59	1.02927e-57
SNCB	43.01	15.5543	-1.46736	2.72769e-22	7.06049e-22
ATRNL1	5.47268	1.98556	-1.4627	1.36642e-47	1.17394e-46
STX1B	19.6366	7.12937	-1.4617	6.09215e-53	7.76234e-52
PID1	37.8862	13.7617	-1.46101	7.91028e-62	2.31259e-60
ZFR2	1.60452	0.582867	-1.4609	2.14676e-14	4.06384e-14
NRG3	5.28809	1.92263	-1.45967	2.21881e-56	3.7762e-55
PCBP3	2.91252	1.05969	-1.45863	6.83918e-56	1.10105e-54
SMIM18	6.14534	2.23871	-1.45683	1.07882e-45	8.22992e-45
TNK2	39.2917	14.3283	-1.45536	3.9161e-61	1.07456e-59
SNCG	25.1514	9.17217	-1.4553	3.4893e-29	1.18911e-28
NRGN	152.876	55.9208	-1.4509	0.000192089	0.000244272
RTN1	70.4099	25.7686	-1.45017	6.60407e-58	1.29865e-56
ELAVL2	4.45987	1.63257	-1.44986	1.0199e-38	5.39816e-38
CPLX1	22.904	8.39557	-1.4479	1.40421e-36	6.72067e-36
PPM1L	8.83891	3.24115	-1.44736	7.95347e-80	6.6884e-77
FHDC1	3.84992	1.41228	-1.44681	4.16124e-34	1.7758e-33
AC025211.1	1.75331	0.643174	-1.4468	2.00406e-38	1.04486e-37
SLIT1	34.3625	12.6091	-1.44637	2.63397e-46	2.08848e-45
FAM57B	8.99093	3.30612	-1.44333	4.03355e-62	1.20888e-60
AL139396.1	3.00218	1.10559	-1.44119	1.56275e-40	9.02305e-40
CAMK1G	4.87518	1.79851	-1.43865	5.97602e-05	7.77726e-05
AC120036.3	5.41289	1.9969	-1.43864	6.41712e-70	5.1947e-68
SYN1	40.9885	15.1233	-1.43845	4.20048e-29	1.42671e-28
ZC3H12B	1.6403	0.606035	-1.43649	1.92688e-56	3.29901e-55
CADM2	25.9803	9.6195	-1.43339	1.19463e-70	1.09477e-68
OPHN1	16.717	6.19039	-1.43321	1.08734e-59	2.54413e-58
SYNPR	4.81922	1.78481	-1.43303	9.25796e-12	1.58391e-11
MYO16	3.3931	1.2586	-1.43078	2.92411e-42	1.8538e-41
PCSK6	3.68359	1.36804	-1.429	1.01399e-38	5.37086e-38
ASIC4	26.3745	9.80032	-1.42824	2.23087e-38	1.15973e-37
AC083864.2	2.74035	1.01914	-1.427	2.10182e-37	1.04623e-36
DPP10	4.49822	1.67422	-1.42587	2.75189e-48	2.47428e-47
AC009102.2	3.57236	1.33002	-1.42543	1.28272e-48	1.17776e-47
ZBTB16	5.83396	2.17266	-1.42502	2.4584e-32	9.66326e-32
KIF21B	14.6919	5.47557	-1.42394	2.9197e-58	5.95436e-57
SCN2A	4.65416	1.73507	-1.42353	2.12978e-23	5.74478e-23
DLGAP3	5.63484	2.10458	-1.42084	1.80828e-37	9.04203e-37
TMEM179	9.49993	3.55291	-1.41892	7.71668e-32	2.96792e-31
RAPGEF4	14.8374	5.54966	-1.41877	2.78944e-46	2.20442e-45
AL157700.1	5.65635	2.11929	-1.41629	1.66812e-50	1.74451e-49
SEMA3D	2.26483	0.848781	-1.41594	5.77761e-40	3.24036e-39
NAP1L3	45.8786	17.2006	-1.41536	2.9812e-74	5.60779e-72
AMER2	23.5981	8.85108	-1.41475	2.98327e-61	8.23338e-60
SYN2	17.6993	6.63908	-1.41464	1.17067e-18	2.62237e-18
TLX1	1.66601	0.62502	-1.41442	1.09192e-19	2.54444e-19
SLC26A4-AS1	1.62125	0.608275	-1.41431	6.41808e-05	8.33666e-05
PRKCE	5.61045	2.10909	-1.41149	2.6138e-59	5.89384e-58
PCDH7	5.35392	2.01409	-1.41047	4.08898e-58	8.29164e-57
ALDOC	430.419	161.975	-1.40997	1.60384e-56	2.77585e-55
ACSL6	7.21605	2.7181	-1.40861	5.15279e-47	4.26545e-46
WNT10B	1.5068	0.567659	-1.40839	1.18487e-07	1.73182e-07
DAAM2	62.7531	23.6691	-1.40668	1.21371e-40	7.04189e-40
NRXN1	11.3078	4.26893	-1.40537	4.04493e-54	5.59249e-53
DLGAP1-AS4	1.53272	0.578661	-1.40531	3.83305e-05	5.0379e-05
FGF13	1.40258	0.529919	-1.40424	2.04884e-40	1.17679e-39
FAM110B	25.3042	9.56152	-1.40406	3.2347e-61	8.91008e-60
CCDC92B	2.1821	0.824544	-1.40405	3.82249e-46	3.00089e-45
PNMA3	6.01509	2.27548	-1.40241	7.02858e-39	3.75628e-38
PRSS35	7.34995	2.78185	-1.40169	3.82183e-36	1.79255e-35
RAB3A	38.22	14.4687	-1.4014	1.36887e-25	4.02413e-25
AC012558.1	1.56534	0.592692	-1.40112	2.3696e-29	8.14001e-29
ANK1	1.86935	0.707861	-1.401	2.63536e-37	1.30409e-36
STXBP6	3.19389	1.21235	-1.3975	7.33041e-46	5.64936e-45
CAMSAP3	4.26512	1.6191	-1.39739	4.45329e-48	3.94206e-47
NTNG2	6.35019	2.41486	-1.39486	5.27539e-66	2.52231e-64
SCN3A	11.5053	4.37813	-1.39391	1.22097e-40	7.0811e-40
NPM2	3.73857	1.42448	-1.39205	3.19608e-18	7.01215e-18
AC023024.2	1.50076	0.572791	-1.38962	2.0626e-41	1.25104e-40
CAMKV	12.2858	4.69058	-1.38915	3.63903e-21	9.00998e-21
RGS7	6.40867	2.44762	-1.38864	2.88323e-29	9.8515e-29
AL590666.2	12.232	4.67233	-1.38845	7.38289e-35	3.25658e-34
AC006960.1	1.41838	0.541808	-1.38839	9.63528e-31	3.53104e-30
FBXL16	48.9814	18.7145	-1.38808	7.19422e-39	3.84193e-38
PCDHGA10	5.72189	2.19025	-1.38539	0.00451113	0.00533381
NET1	20.4699	7.83895	-1.38477	6.46793e-70	5.1947e-68
DGCR6	5.37066	2.05847	-1.38353	6.25679e-41	3.69616e-40
SLC32A1	3.9216	1.50308	-1.38352	8.12937e-10	1.29419e-09
HS6ST3	2.29524	0.88224	-1.3794	0.000517131	0.000642527
AP001972.5	19.9791	7.68018	-1.37928	2.60843e-43	1.73846e-42
VIPR2	10.9838	4.22336	-1.37891	9.39154e-34	3.93267e-33
CELF3	13.8961	5.35437	-1.37589	2.6381e-38	1.36745e-37
AC126407.1	2.66538	1.02748	-1.37522	8.16108e-37	3.9536e-36
MYT1	10.414	4.01731	-1.37423	2.12558e-41	1.2876e-40
HIP1R	44.1829	17.1007	-1.36943	1.80784e-46	1.44627e-45
NAPB	24.3319	9.42339	-1.36853	1.02773e-22	2.70428e-22
SH2D5	2.11636	0.819821	-1.3682	0.00068204	0.000842954
TEF	19.962	7.73344	-1.36808	6.4425e-70	5.1947e-68
CRY2	19.2479	7.45743	-1.36795	3.27728e-77	1.30145e-74
FGF12	10.3448	4.01372	-1.36589	7.26939e-54	9.86925e-53
CTNNA3	2.38281	0.925328	-1.36463	8.77571e-47	7.17721e-46
LINC01532	3.85146	1.49713	-1.3632	1.86716e-30	6.75087e-30
CHRNB2	6.23669	2.42504	-1.36277	1.52623e-35	6.96203e-35
ATP1A3	74.4079	28.9384	-1.36247	3.19542e-45	2.37554e-44
SLCO1A2	7.22109	2.81339	-1.3599	8.21937e-44	5.64652e-43
AC073349.2	2.40977	0.938961	-1.35976	3.62085e-49	3.46246e-48
CKMT1B	1.53666	0.599262	-1.35854	6.71185e-34	2.82796e-33
AL731533.2	2.73906	1.06831	-1.35835	2.58655e-55	3.95056e-54
IPCEF1	2.19339	0.85654	-1.35657	6.03326e-18	1.30744e-17
AK5	10.0521	3.92763	-1.35577	2.37785e-16	4.84656e-16
TMEM246	8.05066	3.14593	-1.35562	3.9e-52	4.64233e-51
CALY	6.61915	2.58836	-1.35461	2.67483e-15	5.2469e-15
HSPA12A	8.97791	3.51078	-1.35459	1.24818e-47	1.07429e-46
SCN8A	3.26766	1.27815	-1.3542	2.47987e-33	1.02197e-32
CORO6	2.61286	1.02407	-1.35132	8.35522e-28	2.68057e-27
SMPD3	4.15298	1.63022	-1.34908	1.11824e-48	1.03405e-47
CDK5R2	11.8899	4.67341	-1.34719	1.41709e-23	3.84853e-23
AC092681.1	2.26868	0.891772	-1.34711	1.69885e-40	9.78909e-40
KLHL32	8.52565	3.3529	-1.3464	3.80635e-58	7.7515e-57
TJP2	41.7712	16.4275	-1.3464	2.04093e-46	1.6291e-45
ANK3	2.60118	1.02348	-1.34568	1.35382e-26	4.14081e-26
SYP	42.7525	16.8409	-1.34404	3.44671e-44	2.40949e-43
PEX5L	4.64149	1.82911	-1.34344	8.32823e-31	3.06462e-30
RHBDL3	15.0575	5.93842	-1.34233	2.69068e-47	2.26804e-46
FRY	6.04756	2.38962	-1.33957	7.42417e-73	1.03045e-70
LINC00641	14.3219	5.66878	-1.33711	1.01972e-70	9.54138e-69
PLN	3.09215	1.22446	-1.33646	0.0340088	0.0379361
GLT1D1	2.39742	0.950085	-1.33536	9.05988e-12	1.55077e-11
CDH22	3.81685	1.51309	-1.33488	5.83301e-39	3.12786e-38
AC007490.1	1.82732	0.724487	-1.33469	5.76156e-44	3.99841e-43
AL391834.1	4.48458	1.7791	-1.33383	4.41089e-46	3.44579e-45
CCK	11.8235	4.69308	-1.33305	9.2614e-08	1.35991e-07
ALDH5A1	29.9141	11.8758	-1.3328	3.09968e-84	1.4771e-80
RASGRF2	2.7265	1.08288	-1.33217	7.9778e-26	2.36179e-25
NKD1	8.01168	3.18424	-1.33115	1.04745e-48	9.71096e-48
AC120036.4	3.8478	1.53027	-1.33025	2.5168e-79	1.9989e-76
AP006333.2	1.76703	0.703904	-1.32787	4.3819e-51	4.74573e-50
TSPOAP1	10.1431	4.04102	-1.3277	1.98421e-54	2.81132e-53
GRAMD1B	9.21968	3.67404	-1.32735	2.46372e-61	6.86576e-60
HAPLN1	5.70172	2.27418	-1.32605	1.11966e-24	3.18098e-24
ZNF488	18.1956	7.26467	-1.32462	1.62685e-47	1.38933e-46
LGR5	2.42579	0.969282	-1.32347	7.39769e-44	5.09183e-43
NEURL1	4.14833	1.65938	-1.32188	2.97847e-12	5.19588e-12
SLC8A3	4.29473	1.71932	-1.32073	2.48304e-43	1.65799e-42
AKAP6	8.29546	3.32193	-1.3203	1.33438e-72	1.79965e-70
SMIM10L2B	5.06801	2.0304	-1.31966	4.87253e-28	1.57882e-27
SLC24A4	2.52693	1.01254	-1.3194	1.51654e-31	5.75689e-31
CACNA1E	1.95955	0.786591	-1.31684	4.24278e-29	1.44073e-28
HS3ST4	2.49801	1.00279	-1.31676	1.9194e-20	4.60553e-20
NDRG2	264.943	106.384	-1.31639	8.85922e-63	2.8461e-61
MATK	2.80452	1.12793	-1.31408	4.3456e-24	1.20513e-23
RIMS3	11.1396	4.48283	-1.31321	4.75173e-20	1.12208e-19
RPRM	20.9473	8.4334	-1.31258	6.29432e-41	3.7168e-40
AC004947.2	3.34718	1.34775	-1.31239	1.58973e-36	7.59585e-36
FAM222A	21.5882	8.69918	-1.31129	2.45912e-54	3.4602e-53
PNMA8B	7.11243	2.86693	-1.31084	1.14834e-46	9.33298e-46
AC007938.1	1.5231	0.614282	-1.31004	3.83518e-45	2.83787e-44
PDZD4	72.8161	29.394	-1.30873	4.67925e-55	6.96093e-54
IRX2	2.73625	1.10481	-1.30841	6.13297e-32	2.37029e-31
SHC3	16.214	6.55273	-1.30707	4.23095e-08	6.29468e-08
TMEFF2	7.6772	3.10409	-1.30641	1.65322e-46	1.33152e-45
SLC1A1	13.3685	5.40681	-1.30598	1.42804e-52	1.76298e-51
YPEL4	5.17432	2.09323	-1.30564	5.6588e-49	5.35041e-48
CALB1	1.73182	0.700914	-1.30498	6.30001e-24	1.73335e-23
SLC30A3	2.09035	0.847345	-1.30273	0.0063863	0.00747185
RCOR2	25.5513	10.3675	-1.30133	1.85108e-47	1.57612e-46
SLC6A1-AS1	1.63163	0.662401	-1.30054	4.35478e-46	3.40598e-45
GRIN2A	2.2318	0.907609	-1.29806	1.48422e-12	2.62377e-12
AC080100.1	1.72691	0.702292	-1.29805	2.76736e-60	6.89237e-59
STXBP1	37.7355	15.3465	-1.29801	2.42624e-41	1.46352e-40
FAM84B	28.2645	11.5012	-1.2972	1.58307e-43	1.07055e-42
TMEM196	1.89747	0.772182	-1.29706	2.90938e-18	6.39687e-18
BTBD17	26.2559	10.6898	-1.29641	6.87305e-35	3.03637e-34
AL645608.6	2.74446	1.11828	-1.29525	1.18431e-39	6.54969e-39
RIPPLY2	6.84246	2.79452	-1.29191	1.50994e-55	2.35656e-54
ARHGDIG	12.0011	4.90374	-1.29121	7.85467e-34	3.29878e-33
ZNF804A	2.6559	1.08522	-1.29121	2.92411e-42	1.8538e-41
KIAA1549L	6.47556	2.64752	-1.29036	1.56056e-50	1.63682e-49
CRHR1	1.60504	0.656458	-1.28984	3.11036e-44	2.18935e-43
TOX	13.5578	5.5509	-1.28833	5.18575e-54	7.10791e-53
AL512625.2	3.61175	1.47941	-1.28768	1.97003e-37	9.82338e-37
ADGRB3	11.8638	4.86105	-1.28722	2.40545e-64	9.17022e-63
PDE1A	3.11458	1.27744	-1.28578	1.16176e-25	3.42374e-25
LRP1B	4.9423	2.02868	-1.28464	1.88456e-58	3.93309e-57
SNORC	8.4956	3.48739	-1.28457	4.45441e-18	9.71032e-18
NRXN3	2.18316	0.89618	-1.28456	2.98405e-19	6.84093e-19
MT-TL1	9.55707	3.92464	-1.28401	1.90213e-33	7.87284e-33
HDAC4	7.12404	2.93217	-1.28073	7.13933e-71	6.80426e-69
C14orf132	38.1985	15.7238	-1.28057	6.69328e-61	1.78521e-59
2021-09-03	71.8293	29.5794	-1.27998	3.41116e-66	1.68158e-64
MFSD4A	4.98392	2.05323	-1.27938	5.25757e-21	1.29478e-20
MAPK8IP2	22.8736	9.42639	-1.27891	4.12689e-53	5.31513e-52
STXBP5L	1.74148	0.718346	-1.27757	1.63337e-19	3.78577e-19
P2RX6	3.36651	1.39078	-1.27536	2.91768e-50	2.99865e-49
SERPINI1	24.7374	10.2217	-1.27507	1.85156e-18	4.10386e-18
ENHO	161.776	66.9057	-1.2738	8.90836e-51	9.47574e-50
SNX22	20.2391	8.38579	-1.27112	6.39213e-34	2.69961e-33
AL359091.1	9.50929	3.94535	-1.26918	3.24674e-41	1.94288e-40
LINC02283	25.3736	10.5342	-1.26825	3.96143e-48	3.51755e-47
PTPN5	5.1057	2.12104	-1.26733	3.00265e-10	4.86357e-10
NTSR2	25.2789	10.5098	-1.2662	1.12343e-19	2.61529e-19
MAPT	42.4733	17.6641	-1.26574	2.66912e-79	2.0083e-76
AC021739.5	3.32158	1.38144	-1.2657	1.10016e-30	4.02248e-30
KCNAB1	3.47225	1.44528	-1.26452	7.47568e-33	3.01133e-32
BCYRN1	2.67852	1.1153	-1.264	2.59556e-25	7.54804e-25
LRRTM3	8.16468	3.40003	-1.26385	5.47992e-54	7.50392e-53
CDK5R1	27.7154	11.5517	-1.26259	1.95032e-49	1.89543e-48
ASIC1	33.7919	14.0886	-1.26215	1.72756e-52	2.11267e-51
GABBR2	25.6154	10.6851	-1.26141	4.20398e-36	1.96662e-35
RELN	1.69388	0.706869	-1.26082	4.01759e-25	1.16055e-24
MRVI1	13.834	5.77451	-1.26045	5.54022e-51	5.96858e-50
RTN4RL1	2.10407	0.878642	-1.25984	1.16339e-13	2.14355e-13
TMEM63C	4.39491	1.83752	-1.25807	6.54155e-45	4.75436e-44
AL121908.1	1.54628	0.647346	-1.25619	2.14365e-44	1.51861e-43
USP43	2.96936	1.24435	-1.25476	1.12698e-43	7.69038e-43
TSPYL2	31.3217	13.1266	-1.25467	5.28883e-52	6.21786e-51
WNK2	4.404	1.8466	-1.25395	1.52731e-33	6.34906e-33
OLMALINC	9.99422	4.19222	-1.25338	5.95191e-61	1.60544e-59
CCL4L2	13.9284	5.84459	-1.25286	6.42676e-06	8.72111e-06
VWA5B2	2.17613	0.915056	-1.24983	4.02542e-35	1.79779e-34
DSCAM	10.7758	4.53135	-1.24978	9.0624e-45	6.53334e-44
FREM3	1.62938	0.686024	-1.248	2.07945e-36	9.8862e-36
CSMD1	1.71247	0.721162	-1.24769	2.791e-36	1.3177e-35
C2orf27A	6.72336	2.83378	-1.24645	2.23193e-47	1.88914e-46
RAB11FIP4	6.17207	2.6056	-1.24414	8.66362e-44	5.94599e-43
SYNGR1	23.4044	9.88291	-1.24377	2.55574e-53	3.35201e-52
CRLF1	16.3406	6.90828	-1.24206	4.03544e-29	1.37195e-28
CDH20	23.1763	9.79877	-1.24198	5.33551e-63	1.73751e-61
CAVIN2	13.0504	5.51766	-1.24196	4.23169e-39	2.28546e-38
NXPH1	19.1681	8.10925	-1.24107	4.59591e-35	2.04237e-34
SMAD9	14.8651	6.29036	-1.24071	4.29917e-58	8.66869e-57
NTN4	8.03635	3.40167	-1.2403	1.05822e-40	6.16726e-40
MAGEE1	7.72809	3.27528	-1.23849	1.6351e-50	1.71123e-49
FGFBP3	13.2935	5.63414	-1.23845	1.12344e-26	3.44575e-26
SYNGR3	7.74285	3.28211	-1.23824	3.57628e-12	6.21749e-12
LINC01561	3.28235	1.39247	-1.23708	3.64243e-40	2.06063e-39
ADAM22	13.3521	5.66467	-1.237	4.8876e-67	2.70826e-65
RTN4R	4.92006	2.08873	-1.23605	3.77266e-31	1.41114e-30
AKR1C3	7.54054	3.20163	-1.23586	6.48941e-48	5.68808e-47
SLC25A27	8.75193	3.7167	-1.23558	5.39726e-52	6.32972e-51
POLR2F	1.46287	0.622294	-1.23314	4.20031e-48	3.72735e-47
SRRM3	5.35888	2.27981	-1.23302	9.13863e-31	3.35592e-30
AC021739.2	11.2261	4.77694	-1.2327	2.59491e-31	9.76232e-31
OTUD7A	1.98652	0.845449	-1.23245	8.36958e-57	1.49564e-55
EYA1	6.1724	2.63031	-1.2306	2.25953e-34	9.75605e-34
AL133465.1	4.9872	2.12741	-1.22913	7.21103e-27	2.23184e-26
LINC00643	3.69111	1.57468	-1.229	2.66338e-26	8.04303e-26
TMOD2	27.3288	11.6615	-1.22867	5.58344e-71	5.58188e-69
LRP4	40.7882	17.4231	-1.22716	3.88392e-51	4.23205e-50
CTTNBP2	12.2783	5.25012	-1.22569	5.84508e-51	6.2828e-50
KIF26A	3.38777	1.44887	-1.22541	1.74734e-37	8.74036e-37
CELF5	8.39949	3.5932	-1.22503	8.2517e-38	4.18024e-37
KCNJ4	7.0877	3.03204	-1.22503	5.77183e-10	9.24216e-10
GAD1	9.97506	4.26821	-1.22469	6.80275e-32	2.62347e-31
AL139246.5	1.85147	0.792287	-1.22458	4.30733e-13	7.75537e-13
SLC38A1	21.1246	9.04198	-1.22421	1.5819e-39	8.72488e-39
RASGEF1C	7.18808	3.07692	-1.22412	3.93374e-47	3.27911e-46
AC069209.1	3.73999	1.60114	-1.22394	6.67598e-43	4.36995e-42
KCNC1	3.29082	1.41113	-1.22159	2.74305e-30	9.84799e-30
GPR17	53.3224	22.8754	-1.22095	3.70864e-38	1.91059e-37
KIAA0513	13.6327	5.85515	-1.2193	6.59238e-39	3.52844e-38
TTPA	1.89553	0.814409	-1.21878	4.10724e-33	1.67381e-32
THSD4	1.50816	0.648173	-1.21834	3.78708e-39	2.04999e-38
NEUROD2	1.66692	0.71659	-1.21797	8.0615e-10	1.28381e-09
AC110285.1	6.57019	2.82448	-1.21795	9.13886e-42	5.63629e-41
CELSR3	5.4702	2.35195	-1.21774	1.83026e-36	8.72179e-36
STUM	10.6828	4.59343	-1.21765	3.99716e-36	1.87171e-35
WDR11-AS1	1.63007	0.701282	-1.21686	1.74771e-33	7.24419e-33
AC107398.3	6.25647	2.69333	-1.21596	2.29687e-34	9.91426e-34
USP54	18.9159	8.1449	-1.21563	9.57406e-57	1.69815e-55
DGKB	4.79214	2.06499	-1.21454	1.57306e-41	9.61047e-41
CABLES1	6.93366	2.98798	-1.21445	1.8131e-35	8.22598e-35
ALDH2	36.4831	15.759	-1.21106	8.53526e-66	4.00066e-64
LINC01105	5.04692	2.18074	-1.21058	2.26369e-35	1.0212e-34
RNF150	3.8662	1.67288	-1.20858	1.56342e-58	3.28685e-57
CNTN1	54.6186	23.698	-1.20462	1.98357e-50	2.05934e-49
AC068643.1	2.04417	0.886966	-1.20456	7.49083e-31	2.76359e-30
LINC00844	96.3023	41.8479	-1.20242	6.71701e-43	4.3948e-42
ANGPTL2	68.8244	29.9197	-1.20183	1.49741e-37	7.51648e-37
GGTA1P	12.7844	5.55857	-1.2016	3.4579e-41	2.06665e-40
FEZF2	1.76844	0.769131	-1.20117	1.82583e-20	4.38469e-20
PCSK2	6.33649	2.75879	-1.19965	6.33031e-29	2.13489e-28
ADCYAP1R1	141.922	61.7963	-1.1995	2.71969e-41	1.63708e-40
RET	3.26799	1.42338	-1.19908	2.52772e-26	7.64305e-26
ATP2B2	12.4731	5.44167	-1.19669	6.07685e-31	2.24889e-30
JAKMIP3	1.55371	0.67908	-1.19406	1.0693e-41	6.57491e-41
PHACTR3	15.2367	6.66119	-1.1937	3.25906e-57	6.05871e-56
AC124312.5	4.10696	1.80026	-1.18986	2.5729e-53	3.36888e-52
FAM81A	3.631	1.59217	-1.18937	1.79599e-21	4.52033e-21
KIF1A	68.6741	30.1155	-1.18926	7.83428e-59	1.68927e-57
Z97653.1	2.52609	1.10866	-1.18809	8.11815e-44	5.58504e-43
PPFIA2	2.86035	1.25646	-1.18682	6.72834e-30	2.37561e-29
OPCML	9.51481	4.18112	-1.18629	1.62596e-32	6.44611e-32
TSHR	2.33906	1.02795	-1.18616	1.48973e-27	4.73904e-27
MIR1249	2.62713	1.15555	-1.1849	4.59436e-27	1.43377e-26
PLPPR1	30.1525	13.2648	-1.18467	6.82686e-39	3.64984e-38
SOX6	7.13897	3.14093	-1.18453	6.12138e-48	5.37538e-47
RIMBP2	1.88838	0.833183	-1.18045	9.75686e-12	1.66787e-11
DOC2A	2.95001	1.30298	-1.1789	1.30245e-07	1.90154e-07
DNAJC12	10.3835	4.5898	-1.17779	2.28053e-65	9.82001e-64
DLG2	4.5468	2.01067	-1.17718	1.0036e-41	6.18157e-41
SEMA6B	20.3094	8.98442	-1.17665	6.01476e-50	6.0469e-49
CHST1	20.0012	8.84892	-1.17651	1.29899e-33	5.41253e-33
AP001486.2	4.15285	1.83751	-1.17635	1.00369e-70	9.50253e-69
KCNN3	18.8095	8.3249	-1.17595	2.72897e-36	1.29055e-35
ACBD7	10.837	4.79725	-1.17569	8.62434e-29	2.89762e-28
DISP3	8.3074	3.68308	-1.17348	1.67448e-46	1.34485e-45
GRIK2	10.3649	4.59571	-1.17334	7.57079e-38	3.84483e-37
AC254562.1	1.51262	0.671192	-1.17226	1.55848e-26	4.75358e-26
ATP9A	55.2369	24.5331	-1.1709	8.1614e-65	3.26822e-63
DGKI	2.6169	1.16267	-1.17041	4.05696e-51	4.41051e-50
OMG	26.5412	11.7966	-1.16986	9.37762e-61	2.46438e-59
CACNA2D2	2.31538	1.0296	-1.16917	1.12689e-51	1.2888e-50
RAP2A	52.2638	23.2434	-1.16899	1.00183e-65	4.60521e-64
MARVELD3	1.4325	0.63762	-1.16777	2.88258e-15	5.6482e-15
UPK2	1.72761	0.769452	-1.16688	1.81326e-43	1.22103e-42
AC124798.1	2.11921	0.944763	-1.1655	7.05975e-31	2.60859e-30
ADAM11	4.30143	1.9179	-1.16529	1.23667e-11	2.10694e-11
AL450311.2	2.20022	0.981949	-1.16393	4.46519e-26	1.33545e-25
MAPT-AS1	2.23252	0.996372	-1.16392	6.25991e-43	4.10136e-42
NECAB2	10.8881	4.86069	-1.16352	7.70235e-38	3.90887e-37
AC243562.2	2.31958	1.03577	-1.16317	2.63848e-36	1.24817e-35
MAP1A	57.051	25.4803	-1.16287	4.39143e-57	8.02812e-56
AC023301.1	5.18652	2.32134	-1.15981	1.44438e-36	6.90597e-36
TPPP	35.5901	15.9495	-1.15797	2.1775e-35	9.84178e-35
MT-TM	3.39234	1.52063	-1.15761	8.64104e-27	2.66406e-26
SATB1	9.64508	4.32527	-1.157	1.47477e-59	3.38959e-58
RNF165	3.67432	1.64887	-1.156	8.16811e-49	7.62713e-48
AP000757.1	2.5234	1.13244	-1.15594	2.18961e-35	9.89339e-35
C1orf115	9.62934	4.32169	-1.15584	2.94296e-06	4.06263e-06
SGCD	2.19828	0.986817	-1.15552	1.82589e-49	1.77813e-48
FAM171A1	37.674	16.9144	-1.15532	9.07251e-66	4.21106e-64
CCL3L1	10.413	4.67558	-1.15516	3.0367e-08	4.5506e-08
TNNT1	2.12381	0.95454	-1.15377	1.68777e-23	4.57323e-23
NELL1	1.69504	0.761939	-1.15357	1.96191e-11	3.31845e-11
SLC2A13	5.03142	2.26388	-1.15217	2.46587e-34	1.06277e-33
MRO	18.4845	8.32186	-1.15134	7.49346e-39	3.99726e-38
TCEAL2	69.3084	31.2081	-1.15111	4.26477e-63	1.40159e-61
LRFN2	1.34336	0.605444	-1.14978	8.65057e-20	2.0264e-19
2021-03-08	13.1364	5.92675	-1.14826	6.96114e-65	2.81916e-63
PRR36	14.055	6.34587	-1.1472	1.55189e-44	1.10763e-43
RNA5SP508	2.55659	1.15456	-1.14688	3.61075e-33	1.47484e-32
ADCY5	6.27726	2.83512	-1.14672	6.86353e-51	7.34989e-50
FCHSD2	32.9834	14.9078	-1.14567	7.29411e-67	3.96489e-65
PDZD8	7.6533	3.45937	-1.14557	1.36886e-76	4.89231e-74
AKAP5	1.43475	0.648973	-1.14457	2.35233e-10	3.82581e-10
AL023806.1	1.51925	0.687502	-1.14393	3.95912e-47	3.29642e-46
ERBB4	4.46293	2.01994	-1.14368	1.63149e-35	7.42324e-35
UBE2QL1	7.6968	3.48408	-1.14348	1.88922e-29	6.51744e-29
PSTPIP1	3.3287	1.50743	-1.14287	1.18208e-32	4.72039e-32
PLPPR3	4.1036	1.85989	-1.14167	1.06116e-34	4.64068e-34
SPOCK1	37.213	16.8766	-1.14078	6.5679e-34	2.77139e-33
SST	14.6565	6.64941	-1.14025	1.52024e-13	2.78961e-13
CNTNAP4	6.41287	2.91097	-1.13947	5.60774e-25	1.61304e-24
GRID1	11.0191	5.00409	-1.13882	1.62193e-66	8.3108e-65
CCSER2	14.9039	6.77555	-1.13728	4.61809e-78	2.44519e-75
SLC6A1	53.0435	24.1517	-1.13505	6.3774e-54	8.68298e-53
DDX25	2.90626	1.3242	-1.13404	1.00292e-40	5.84973e-40
LINGO1	38.1062	17.3837	-1.13229	1.06455e-40	6.20161e-40
GALNT17	7.78777	3.55528	-1.13125	5.99778e-15	1.15965e-14
PKMP3	7.17781	3.27782	-1.13081	9.30682e-62	2.69879e-60
RICTOR	5.53106	2.52605	-1.13067	1.90639e-62	5.92473e-61
RASAL1	2.18756	0.999193	-1.13049	1.64795e-09	2.59261e-09
GLUD1	172.729	78.912	-1.13019	1.15694e-66	6.03637e-65
FXYD7	11.3374	5.17978	-1.13013	2.48454e-10	4.03442e-10
PTER	3.57868	1.63525	-1.12992	0.0119312	0.01374
DOCK3	7.85734	3.59351	-1.12865	6.25531e-46	4.84431e-45
KIAA1755	8.11745	3.72056	-1.12551	1.37529e-47	1.18085e-46
PLCXD3	1.93871	0.888825	-1.12513	6.32377e-25	1.81244e-24
VSTM2L	13.5178	6.20244	-1.12395	2.08547e-13	3.8062e-13
ICAM5	4.20271	1.92878	-1.12363	5.20411e-09	8.04912e-09
ADGRA1	8.53678	3.91834	-1.12345	3.2156e-45	2.38806e-44
KIF3C	30.6157	14.0529	-1.12341	2.13882e-49	2.07721e-48
DKFZp779M0652	2.7125	1.2457	-1.12267	4.72091e-33	1.92115e-32
GABRB1	2.17051	0.996829	-1.12262	6.19607e-27	1.92312e-26
KCNN1	5.40462	2.48701	-1.11978	3.13491e-34	1.34625e-33
SLC1A4	35.7627	16.4594	-1.11954	5.68573e-41	3.36576e-40
SH3GL3	6.20832	2.85821	-1.11909	6.25488e-34	2.64399e-33
CLSTN2	6.41	2.95108	-1.11908	4.4184e-32	1.72066e-31
CMTM5	23.8747	10.999	-1.11812	3.15503e-48	2.82786e-47
FBLL1	13.3932	6.17324	-1.1174	2.33794e-37	1.16012e-36
AL590999.1	1.87683	0.865149	-1.11728	6.56422e-27	2.03474e-26
PTPRN	12.8773	5.94335	-1.11548	3.70408e-13	6.69282e-13
RGS9	6.39307	2.95299	-1.11433	3.6332e-30	1.30046e-29
CSRNP3	3.43265	1.58586	-1.11405	1.5255e-43	1.0326e-42
NTRK2	104.771	48.4046	-1.11403	1.24594e-42	8.04154e-42
ZDHHC11B	4.08576	1.8877	-1.11398	1.89283e-37	9.45822e-37
CBX7	10.1385	4.68476	-1.1138	9.21102e-51	9.77585e-50
NKAIN3-IT1	20.7035	9.56763	-1.11364	1.61735e-32	6.41376e-32
AC093458.1	1.7253	0.797397	-1.11348	4.32973e-39	2.33753e-38
REM1	2.40393	1.11224	-1.11192	9.78886e-07	1.37982e-06
EPHB6	7.53449	3.49121	-1.10978	0.00397714	0.00471727
PLCH2	2.07489	0.962002	-1.10892	6.93398e-34	2.91983e-33
CRYM	6.15245	2.85377	-1.10829	1.04991e-05	1.41107e-05
GRIA1	25.6865	11.9158	-1.10814	2.52019e-33	1.03769e-32
CD38	11.2949	5.23984	-1.10807	5.01304e-27	1.56136e-26
MT-TV	1.35042	0.626517	-1.10798	2.19755e-23	5.92198e-23
SPRN	5.1065	2.37133	-1.10664	3.87267e-32	1.51143e-31
GFOD1	3.04808	1.41586	-1.10622	8.42682e-27	2.59913e-26
KAT6B	5.53903	2.57569	-1.10467	3.28325e-63	1.09157e-61
PNCK	3.91621	1.82107	-1.10467	7.22423e-30	2.54629e-29
WASF3	38.5301	17.918	-1.10458	2.95589e-59	6.59243e-58
H2AFY2	19.9043	9.25924	-1.10412	1.11356e-45	8.47684e-45
SAPCD2	19.9725	9.29408	-1.10363	8.34051e-25	2.38043e-24
PPP1R1A	6.75911	3.14921	-1.10185	1.73738e-37	8.6936e-37
PRRT1	8.50058	3.96476	-1.10033	7.96022e-46	6.11495e-45
GNG3	33.6081	15.684	-1.09951	0.000411588	0.000514656
KIF3A	14.528	6.78078	-1.09931	5.34559e-59	1.16318e-57
LINC00320	5.9585	2.78121	-1.09924	8.56497e-35	3.76522e-34
LINC00519	1.40661	0.656758	-1.09879	3.43659e-21	8.51907e-21
MTURN	110.184	51.5264	-1.09653	3.71492e-46	2.92287e-45
AC072052.1	2.58684	1.2104	-1.0957	9.91106e-40	5.49181e-39
CYP4X1	1.29688	0.607803	-1.09337	6.64764e-13	1.18897e-12
CALCRL	22.2979	10.4521	-1.09312	3.10532e-36	1.46369e-35
SNCA	12.232	5.73434	-1.09296	2.20782e-10	3.59405e-10
PLIN1	1.82559	0.855996	-1.09268	5.44907e-29	1.84204e-28
ARRB1	7.51528	3.5247	-1.09232	1.39442e-41	8.53366e-41
AL391834.2	5.26081	2.46967	-1.09097	1.27036e-56	2.21477e-55
PLEKHM3	1.36116	0.639041	-1.09086	5.01768e-31	1.86658e-30
SEC14L5	3.5711	1.67715	-1.09036	5.2235e-20	1.23125e-19
LINC00928	1.94456	0.913258	-1.09035	1.22373e-29	4.25249e-29
GRIN2C	3.23321	1.51985	-1.08904	5.55053e-38	2.83901e-37
HSF2BP	1.78405	0.838672	-1.08898	1.34316e-37	6.74933e-37
VPS13D	10.2609	4.82485	-1.0886	4.41089e-46	3.44579e-45
AC254562.3	4.09268	1.92468	-1.08843	1.19307e-53	1.60755e-52
ZCCHC24	64.9172	30.5344	-1.08817	1.66141e-63	5.79306e-62
MAST1	9.05932	4.26212	-1.08783	1.5047e-38	7.90271e-38
OLIG2	125.787	59.2177	-1.08688	3.33001e-39	1.80736e-38
MAP2	77.3483	36.4161	-1.08679	1.69359e-53	2.25855e-52
C5orf38	3.6381	1.71492	-1.08505	7.93034e-23	2.09521e-22
SORCS3	5.30768	2.50223	-1.08487	1.14936e-45	8.74469e-45
BEST3	7.07978	3.33785	-1.08478	1.0794e-31	4.12155e-31
SCAMP5	56.5412	26.667	-1.08425	6.37548e-56	1.03104e-54
DIRAS2	13.7435	6.48835	-1.08282	8.89182e-14	1.64639e-13
PCDHGB5	3.27354	1.5459	-1.0824	4.53533e-07	6.47658e-07
GAREM2	18.5382	8.76015	-1.08147	1.50053e-48	1.36983e-47
NCAM2	15.4015	7.28748	-1.07957	3.89794e-56	6.40516e-55
DGCR5	3.4858	1.64949	-1.07947	1.71968e-33	7.13214e-33
PABPC5	2.55328	1.20835	-1.07931	4.10989e-39	2.22136e-38
AL031056.1	5.90907	2.79662	-1.07925	8.31122e-11	1.376e-10
CACNA1A	5.23823	2.47954	-1.07901	8.04303e-36	3.72114e-35
ANKRD33B	1.46435	0.693873	-1.07752	7.00542e-12	1.20459e-11
DRP2	3.80337	1.80298	-1.0769	2.28503e-44	1.61477e-43
OLIG1	304.887	144.546	-1.07674	2.07391e-37	1.03269e-36
BCL7A	11.8398	5.61417	-1.0765	4.03749e-56	6.61926e-55
FAM131C	3.11796	1.47881	-1.07617	1.56788e-25	4.59501e-25
CAMK1D	11.9204	5.65442	-1.07598	7.14513e-50	7.1682e-49
TMEM121B	5.57491	2.64618	-1.07504	6.16137e-54	8.40486e-53
ST6GAL2	5.99415	2.84553	-1.07486	2.04842e-27	6.47739e-27
ADHFE1	8.26817	3.92523	-1.07479	2.48864e-49	2.41041e-48
CPNE6	4.577	2.17364	-1.07429	1.51946e-10	2.48737e-10
DNAJC6	16.654	7.92354	-1.07165	1.843e-38	9.64759e-38
CDKL5	2.09973	0.999018	-1.07162	1.04625e-16	2.1549e-16
GRID2	4.12146	1.9616	-1.07112	2.11881e-36	1.00633e-35
AL157392.3	1.57786	0.751798	-1.06955	6.80468e-65	2.76363e-63
RPL7P38	2.19888	1.04819	-1.06887	6.35754e-34	2.6858e-33
LRIG1	109.119	52.0379	-1.06827	4.23932e-49	4.03497e-48
KCNH8	2.66761	1.27288	-1.06745	5.59403e-31	2.0772e-30
HMGN5	11.9384	5.69886	-1.06686	4.32922e-53	5.55571e-52
RYR1	3.44275	1.64354	-1.06675	6.32013e-28	2.03726e-27
RAB27B	2.69577	1.2883	-1.06523	2.12896e-31	8.04748e-31
KIF5C	35.156	16.8144	-1.06407	6.07897e-37	2.95897e-36
AP000911.1	2.63122	1.25993	-1.06239	6.7478e-39	3.61027e-38
EPHB1	16.1497	7.73516	-1.062	6.4196e-45	4.67999e-44
RALYL	2.57308	1.23248	-1.06193	3.07228e-16	6.24059e-16
COL26A1	2.94284	1.4105	-1.06101	3.88241e-30	1.38827e-29
AC092117.1	2.45301	1.1759	-1.06079	6.80886e-37	3.30974e-36
LINC01088	13.721	6.5809	-1.06003	1.70456e-15	3.37091e-15
FBXO41	7.36608	3.53537	-1.05903	6.21637e-23	1.64909e-22
EIF4BP7	1.56882	0.753074	-1.05882	6.76771e-57	1.21853e-55
KCTD4	3.64402	1.74958	-1.05852	5.3786e-36	2.50464e-35
AC104985.1	1.3673	0.65718	-1.05697	1.84314e-37	9.2131e-37
ADCY2	12.868	6.19215	-1.05527	1.30722e-43	8.89058e-43
HMX1	4.8685	2.34333	-1.05492	6.49698e-34	2.74308e-33
GNAO1	35.5682	17.1249	-1.05449	1.87731e-67	1.09098e-65
HIPK2	44.1187	21.2421	-1.05447	7.27502e-53	9.18761e-52
NPTX1	12.8284	6.17805	-1.05412	7.40538e-08	1.09164e-07
RGMB	9.20442	4.43343	-1.0539	5.25617e-43	3.45323e-42
SYT7	8.68189	4.18511	-1.05274	2.09645e-05	2.78539e-05
FRA10AC1	4.63795	2.23656	-1.05221	1.16659e-69	8.96647e-68
FA2H	12.3411	5.95128	-1.0522	7.57523e-26	2.24586e-25
PLCL1	3.94226	1.90194	-1.05155	6.79081e-48	5.9377e-47
AP003469.4	5.02284	2.42423	-1.05098	4.42445e-48	3.91896e-47
SOWAHA	4.68808	2.26494	-1.04952	1.26085e-10	2.07186e-10
SYT5	4.979	2.40636	-1.049	4.54997e-08	6.75876e-08
SLC1A2	94.5474	45.7976	-1.04576	2.83647e-33	1.1649e-32
FGF17	1.54886	0.750487	-1.04531	7.55295e-21	1.84608e-20
PPP1R16B	10.6107	5.14183	-1.04517	3.28205e-26	9.86756e-26
SULF2	58.2697	28.2454	-1.04473	8.74014e-43	5.6795e-42
KIF13A	10.214	4.95396	-1.0439	2.16536e-59	4.9293e-58
AC098587.1	1.43066	0.694315	-1.04301	2.76353e-38	1.43039e-37
BRSK2	8.88281	4.31873	-1.04041	8.47678e-43	5.51337e-42
ABLIM3	10.5769	5.14247	-1.04039	1.78006e-38	9.32493e-38
BCR	21.1928	10.3053	-1.04019	8.36958e-57	1.49564e-55
EHD3	17.4227	8.47566	-1.03957	3.02145e-47	2.53788e-46
MYO5A	13.3939	6.51797	-1.03908	1.1094e-42	7.17646e-42
STX1A	11.2851	5.49372	-1.03856	0.0160369	0.0183015
ERC2	2.09292	1.01903	-1.03832	3.57793e-29	1.21844e-28
NECTIN1	12.1857	5.93896	-1.0369	2.85229e-51	3.14389e-50
CARMIL3	3.5471	1.72906	-1.03665	1.56162e-44	1.11402e-43
RAB6B	43.3724	21.1511	-1.03605	1.40566e-48	1.28733e-47
MIR325HG	1.49599	0.729959	-1.03521	8.98492e-32	3.44184e-31
DYNC1I1	7.93859	3.87428	-1.03496	6.92653e-22	1.7673e-21
PCDHGA11	1.75426	0.856133	-1.03495	2.66431e-09	4.16046e-09
GRK3	4.66959	2.27897	-1.03492	5.09487e-49	4.82359e-48
TMCC2	12.8296	6.26259	-1.03465	1.55493e-47	1.33109e-46
LHFPL4	19.2788	9.41469	-1.03403	2.5206e-50	2.59989e-49
ZMYND11	36.0901	17.627	-1.03382	3.86302e-76	1.12706e-73
SRRM4	2.34419	1.1451	-1.03361	2.27073e-32	8.94032e-32
ZNF25	12.223	5.97959	-1.03148	5.36095e-67	2.9477e-65
ZNF365	4.12854	2.02071	-1.03077	6.66031e-30	2.35275e-29
GRM3	7.63491	3.74062	-1.02934	3.3895e-13	6.13449e-13
ACVR2B	2.34043	1.14725	-1.0286	8.81297e-55	1.28561e-53
STMN2	55.6877	27.309	-1.02798	1.1003e-11	1.87708e-11
AC087241.1	2.15587	1.05762	-1.02745	7.25732e-34	3.05149e-33
CTIF	16.0478	7.87893	-1.02631	5.16441e-72	6.42003e-70
BICDL1	1.30537	0.641721	-1.02444	4.78868e-12	8.28801e-12
AFF3	3.39848	1.67075	-1.0244	1.03125e-41	6.34369e-41
SEMA4A	3.28595	1.61567	-1.02417	5.6248e-36	2.61673e-35
LRRC4	17.1292	8.42881	-1.02306	5.04462e-54	6.9211e-53
KCNAB2	10.4205	5.12923	-1.0226	6.31843e-09	9.72841e-09
ISLR2	1.58136	0.778622	-1.02217	5.72616e-06	7.79333e-06
DOC2B	3.0788	1.51657	-1.02155	3.59313e-27	1.125e-26
HES6	170.345	83.9123	-1.02151	1.83335e-35	8.3152e-35
ALDH1L2	3.28246	1.61696	-1.02149	6.93739e-33	2.79766e-32
LRRTM2	9.67466	4.76975	-1.0203	8.44334e-38	4.27429e-37
CYFIP2	21.5038	10.6032	-1.0201	1.51741e-53	2.03497e-52
MYORG	15.9151	7.84777	-1.02004	3.53026e-42	2.22427e-41
UGT8	27.0051	13.3214	-1.01949	5.84941e-36	2.71945e-35
AL158212.3	4.13779	2.04272	-1.01837	8.39445e-68	5.08505e-66
AL353796.1	1.66768	0.824307	-1.01659	5.67216e-54	7.75231e-53
CXXC4	8.17568	4.04209	-1.01624	4.48802e-45	3.30555e-44
AC131097.3	6.41163	3.17149	-1.01553	5.34868e-18	1.16155e-17
SLC24A2	5.65723	2.79952	-1.01491	6.22353e-18	1.34826e-17
PRKCZ	5.88801	2.91445	-1.01456	4.09925e-31	1.5317e-30
RNU6-1110P	1.35045	0.66883	-1.01373	8.04451e-15	1.54742e-14
HPCA	20.1808	9.99525	-1.01367	0.000968645	0.00118641
ABLIM1	32.676	16.1921	-1.01294	2.51142e-58	5.16595e-57
NGEF	11.6339	5.76629	-1.01263	1.88552e-06	2.62417e-06
PHACTR1	5.46164	2.70715	-1.01256	6.07017e-33	2.45486e-32
FXYD6	147.836	73.3656	-1.01082	1.69268e-52	2.07357e-51
STXBP5	2.46136	1.22161	-1.01067	2.14537e-30	7.73525e-30
SLC15A2	19.0681	9.46911	-1.00986	2.33143e-26	7.06445e-26
AC103974.1	3.31078	1.64442	-1.00959	3.05401e-48	2.74247e-47
LRRC8A	87.4669	43.4439	-1.00958	3.72323e-54	5.1677e-53
PARD3-AS1	1.69428	0.841548	-1.00956	1.38086e-20	3.33575e-20
MIR770	8.34728	4.1473	-1.00913	3.51897e-12	6.12085e-12
GPIHBP1	8.32919	4.14095	-1.00821	1.00999e-34	4.41961e-34
CNNM2	1.5268	0.759382	-1.00762	1.15641e-71	1.27169e-69
GNAI1	15.2183	7.57139	-1.00718	2.91033e-51	3.19801e-50
SHISA9	2.97441	1.47988	-1.00712	1.90312e-11	3.22015e-11
PDE8B	14.5394	7.23509	-1.00688	3.2432e-47	2.72094e-46
GALNT14	1.36943	0.681538	-1.00671	1.25771e-30	4.58562e-30
MYCBP2	7.49992	3.73566	-1.00551	8.55821e-51	9.12365e-50
AC006058.4	1.70462	0.849362	-1.005	1.38362e-21	3.49973e-21
SAMD11	3.39709	1.69346	-1.00433	2.16429e-41	1.30883e-40
NTM	17.6595	8.80409	-1.00419	2.52163e-49	2.43905e-48
TRAPPC13P1	2.14049	1.06721	-1.0041	9.04235e-34	3.78756e-33
ID2-AS1	2.11471	1.05545	-1.0026	3.86674e-43	2.55684e-42
BASP1	77.1626	38.5309	-1.00189	2.32464e-37	1.15433e-36
EPB41L4A-AS1	11.3713	5.67898	-1.0017	2.89121e-60	7.17582e-59
CACNG8	4.53422	2.26491	-1.0014	1.49622e-18	3.3302e-18
PITPNM3	2.9438	1.4714	-1.00049	7.74846e-05	0.000100291
FAXC	2.69762	1.34861	-1.00021	3.98419e-46	3.11928e-45
AGMO	0.90194	1.8041	1.00018	1.27025e-08	1.93186e-08
VRK2	0.81313	1.62655	1.00025	8.52583e-32	3.27121e-31
ROMO1	50.2156	100.453	1.00031	1.16071e-53	1.56543e-52
ATRAID	30.3171	60.6604	1.00062	1.08122e-65	4.93839e-64
C19orf48	6.7204	13.4524	1.00125	3.19871e-44	2.24712e-43
GMPR	7.25559	14.5238	1.00125	1.72307e-24	4.85665e-24
CNPY4	7.67046	15.359	1.0017	7.35813e-68	4.55376e-66
HMGN2	46.5396	93.1906	1.00172	9.49684e-50	9.44137e-49
ZIC1	4.24825	8.50989	1.00227	2.53295e-22	6.56355e-22
KIF9	1.01935	2.04377	1.00359	4.60395e-53	5.90297e-52
CLEC11A	3.79759	7.61672	1.00409	9.82394e-40	5.44564e-39
ADGRL4	3.32272	6.6685	1.005	3.07001e-35	1.37799e-34
TUBA1A	367.107	736.771	1.00502	5.13065e-39	2.75951e-38
SNRPG	14.2132	28.5269	1.00509	2.80451e-54	3.93844e-53
PHF11	2.2271	4.47084	1.00538	1.62974e-42	1.0462e-41
MIR4648	0.725862	1.45826	1.00648	1.56028e-08	2.36115e-08
RPL24P2	1.49021	2.99471	1.0069	2.644e-19	6.07207e-19
LMNA	11.603	23.3189	1.00701	8.83575e-49	8.22905e-48
CKLF	4.12788	8.30385	1.00838	2.03438e-61	5.71385e-60
ZFP36	37.5344	75.5269	1.00878	8.22318e-24	2.25251e-23
DDOST	36.1035	72.6708	1.00924	1.22276e-71	1.3344e-69
CHPF2	8.47029	17.0539	1.00962	4.66679e-67	2.59597e-65
SLC2A3	4.8178	9.70275	1.01002	8.30403e-20	1.9471e-19
VKORC1	6.59306	13.2846	1.01073	2.03948e-58	4.23169e-57
MRGPRF	1.26324	2.54638	1.01132	3.55383e-12	6.17997e-12
AC020915.3	0.954083	1.92457	1.01235	1.27955e-68	8.71069e-67
HLA-K	1.15154	2.32364	1.01281	5.1189e-22	1.31311e-21
GJA4	2.39066	4.82709	1.01374	9.38114e-30	3.28065e-29
IFT22	6.1128	12.3444	1.01395	2.5561e-61	7.10933e-60
EFNB1	5.34645	10.7968	1.01396	1.57683e-60	4.04711e-59
KIRREL1	2.56359	5.18052	1.01493	2.13311e-33	8.82376e-33
LILRA2	0.934534	1.88929	1.01553	3.68724e-29	1.25536e-28
ERBB2	3.16577	6.40146	1.01584	2.09967e-26	6.37573e-26
PDIA3P1	2.38855	4.83196	1.01647	2.01709e-44	1.43179e-43
SPAG1	1.5463	3.13513	1.0197	7.6554e-27	2.36733e-26
MCM8	0.974444	1.97608	1.01999	3.41995e-46	2.69376e-45
NUP107	3.06653	6.21923	1.02013	3.46993e-28	1.13101e-27
RSPH1	2.62336	5.32358	1.02098	0.0178358	0.0202735
AC138207.3	3.18281	6.45901	1.02101	1.05671e-29	3.68817e-29
FKBP5	6.06916	12.323	1.02178	1.84884e-20	4.43921e-20
WDR34	13.5471	27.5069	1.02181	2.50373e-53	3.28681e-52
MT1XP1	2.75188	5.58946	1.02229	5.35319e-16	1.07803e-15
YIPF1	7.64275	15.5374	1.02359	1.41134e-71	1.50572e-69
BRCA1	1.10166	2.24024	1.02397	5.69604e-49	5.37495e-48
RRAS	11.4332	23.251	1.02407	1.88652e-42	1.2067e-41
NECTIN2	8.40837	17.0999	1.02409	4.9896e-57	9.02929e-56
ARHGAP29	0.929954	1.89177	1.02451	1.17743e-37	5.93324e-37
DEDD2	4.34161	8.8335	1.02476	6.65748e-53	8.43753e-52
AC080112.1	0.705662	1.4362	1.02521	1.0347e-20	2.51437e-20
CXorf40A	1.38304	2.81652	1.02606	3.61397e-43	2.39191e-42
CD33	0.709714	1.44552	1.02628	4.75427e-28	1.54155e-27
TMEM255A	9.63101	19.6203	1.02659	1.83568e-34	7.9572e-34
CYTH4	2.32056	4.72992	1.02734	4.41031e-30	1.57349e-29
NRAV	3.22642	6.5812	1.02842	2.64914e-51	2.94266e-50
HCST	4.16957	8.50725	1.02879	5.35212e-30	1.90097e-29
SLC30A7	1.61677	3.29878	1.02882	1.51461e-70	1.36181e-68
NIPSNAP3A	5.28948	10.7965	1.02937	1.42414e-48	1.30343e-47
PHTF1	1.49756	3.05706	1.02953	2.0918e-67	1.20098e-65
AJUBA	0.944722	1.92891	1.02982	9.41918e-42	5.80667e-41
PTHLH	0.860288	1.7579	1.03096	3.00147e-29	1.02481e-28
KATNAL2	0.880905	1.80081	1.03159	3.06486e-31	1.1494e-30
ITGB1	11.8023	24.1308	1.03181	5.07456e-41	3.0127e-40
PIH1D2	0.734968	1.50342	1.0325	2.10692e-36	1.00101e-35
MDM4	3.85974	7.89808	1.033	8.58466e-07	1.21295e-06
WDHD1	0.850103	1.73955	1.03301	5.59974e-39	3.00616e-38
RN7SL2	104.617	214.164	1.0336	0.000384148	0.000481103
P2RY1	3.2588	6.67446	1.03431	1.09436e-18	2.45489e-18
ARID5A	6.2299	12.7613	1.03449	4.86609e-49	4.6131e-48
SLC12A7	3.34955	6.86126	1.0345	8.37526e-50	8.34956e-49
FHOD1	2.08498	4.27166	1.03476	9.24129e-57	1.6432e-55
WIPI1	2.58417	5.29535	1.03502	2.05417e-58	4.25601e-57
REXO2	4.47784	9.1792	1.03556	2.37494e-74	4.58813e-72
SERTAD3	3.76581	7.72124	1.03587	4.0329e-57	7.41058e-56
SLC26A2	1.5797	3.23965	1.03619	9.43342e-49	8.77995e-48
CLIC4	55.1093	113.133	1.03765	1.00467e-50	1.06549e-49
GNGT2	0.739636	1.51839	1.03765	1.54329e-35	7.03762e-35
CIP2A	0.922257	1.89429	1.03842	2.73116e-38	1.41415e-37
TRAM1	19.6808	40.4249	1.03846	3.09097e-65	1.31513e-63
PMS2P1	6.73676	13.838	1.03851	1.28518e-67	7.56085e-66
CNR1	5.36293	11.0169	1.03863	2.36035e-16	4.81295e-16
KIF18B	2.04642	4.2041	1.03869	6.43688e-21	1.5776e-20
TRPV2	1.81536	3.73049	1.03911	3.16455e-42	2.00179e-41
CCZ1	1.0002	2.05645	1.03986	1.49554e-51	1.69955e-50
RND3	6.35476	13.0681	1.04014	1.12195e-23	3.05862e-23
HMGB1P1	0.981402	2.01824	1.04018	5.99085e-27	1.86024e-26
ISYNA1	5.1015	10.4943	1.04061	9.2086e-48	7.96408e-47
CMTM7	1.37351	2.82551	1.04065	2.56116e-33	1.05395e-32
TTC38	4.05907	8.35896	1.04217	1.01315e-56	1.78815e-55
SLC1A5	4.20174	8.65422	1.04242	6.15132e-36	2.85796e-35
DENND2A	13.968	28.7772	1.0428	1.43875e-34	6.25557e-34
CEBPB	8.24309	16.9898	1.04341	3.04158e-33	1.2452e-32
SETD9	1.28514	2.64984	1.04398	1.78973e-48	1.62451e-47
SH3BGR	9.51708	19.6455	1.04561	7.84886e-22	2.0012e-21
KNTC1	0.968592	2.00093	1.04671	1.18652e-42	7.66842e-42
PDK3	1.31133	2.70935	1.04692	2.81936e-42	1.79136e-41
TMEM185B	3.98434	8.23246	1.04698	2.50897e-44	1.7704e-43
SLC15A3	2.89037	5.97559	1.04783	5.67974e-38	2.90095e-37
KCNMB1	0.912798	1.88895	1.04921	1.09687e-26	3.36859e-26
FOSL2	6.13651	12.6991	1.04923	8.27387e-28	2.65507e-27
H2AFJ	2.33353	4.83012	1.04954	1.11218e-46	9.04424e-46
HOXD8	1.35923	2.81398	1.04982	3.14371e-16	6.38298e-16
DLL4	1.04815	2.17086	1.05042	7.91742e-28	2.5424e-27
TRAIP	1.15782	2.39881	1.05091	8.60287e-42	5.31489e-41
PGK1	48.6906	100.896	1.05115	4.69084e-31	1.74727e-30
TPST1	15.6836	32.5016	1.05126	5.02907e-50	5.08456e-49
VASP	6.68424	13.8582	1.0519	3.65442e-66	1.79531e-64
SLC38A6	1.17641	2.44072	1.05292	4.13582e-45	3.05559e-44
ADSSL1	0.719229	1.49244	1.05315	7.24008e-33	2.91808e-32
CCDC125	0.89007	1.8471	1.05327	3.47471e-54	4.83214e-53
C1orf162	4.03662	8.38211	1.05417	4.12931e-33	1.68232e-32
2021-03-02	3.34609	6.95386	1.05534	1.11807e-26	3.43151e-26
NTAN1	2.11617	4.39824	1.05547	1.14242e-74	2.36697e-72
SBNO2	3.55409	7.38797	1.0557	3.90824e-45	2.88894e-44
COLEC12	2.64463	5.49985	1.05633	2.16687e-15	4.26982e-15
SYTL3	1.16793	2.42898	1.05639	2.19249e-38	1.1406e-37
OXTR	2.57644	5.35852	1.05645	3.36725e-19	7.70828e-19
HELZ2	1.78444	3.71259	1.05696	1.17271e-25	3.45529e-25
PIM1	5.88486	12.2547	1.05826	2.6372e-44	1.85996e-43
HLA-F	4.31902	8.99648	1.05866	4.65748e-32	1.80933e-31
ZNF367	1.72499	3.59322	1.05869	2.33742e-33	9.64938e-33
LINC01150	0.959775	1.99975	1.05905	8.10343e-29	2.72709e-28
PARVG	1.37555	2.86637	1.05921	9.71898e-35	4.25943e-34
SLA	3.03729	6.33309	1.06012	2.20314e-27	6.95433e-27
EHD4	2.65069	5.52862	1.06055	9.2086e-48	7.96408e-47
CTSL	30.5931	63.8181	1.06076	8.1027e-50	8.08348e-49
PYCARD	3.4609	7.22446	1.06174	4.20292e-37	2.06123e-36
CERKL	0.864419	1.80509	1.06226	1.63096e-24	4.6034e-24
TRIB3	3.48175	7.27184	1.06251	1.11628e-18	2.50249e-18
ZNF816	0.72884	1.52245	1.06272	2.59102e-56	4.38357e-55
ZP3	0.747999	1.56301	1.06322	5.60169e-20	1.3193e-19
C1QTNF1	8.12333	16.9946	1.06493	2.29438e-15	4.51922e-15
LAP3	21.1548	44.2704	1.06535	3.85258e-65	1.60573e-63
PLXDC1	1.6112	3.37192	1.06543	1.98608e-28	6.55578e-28
SPI1	10.8755	22.7689	1.06598	1.45174e-35	6.62435e-35
SDHAF3	4.16591	8.72228	1.06607	3.87267e-32	1.51143e-31
MXRA7	6.30779	13.2126	1.0667	1.60776e-36	7.67942e-36
PLCG1-AS1	0.734465	1.53851	1.06677	1.0204e-21	2.59152e-21
MRPS12	6.68367	14.0012	1.06683	4.7125e-62	1.40647e-60
ALG6	1.80117	3.77693	1.06828	1.36524e-64	5.36194e-63
GPC1	26.2321	55.0173	1.06855	1.19348e-27	3.81445e-27
ERICH6-AS1	1.15879	2.43203	1.06955	5.34521e-22	1.37018e-21
HIST1H2BC	0.82703	1.73646	1.07014	2.81761e-16	5.72899e-16
TP53I13	3.75837	7.8924	1.07036	1.25895e-66	6.5447e-65
ADAM8	1.01266	2.12663	1.07041	1.2534e-06	1.75741e-06
AC005912.1	12.9893	27.2957	1.07135	5.68209e-26	1.69267e-25
DUSP4	1.5562	3.27358	1.07284	1.84472e-19	4.2632e-19
LOXL3	3.51144	7.38718	1.07296	3.41942e-55	5.15111e-54
MKI67	1.79499	3.77632	1.073	2.1097e-26	6.4048e-26
CCR1	3.69421	7.77262	1.07314	4.12019e-26	1.2333e-25
MGST2	3.05329	6.42657	1.07368	2.45248e-57	4.62542e-56
RGS1	12.9061	27.1739	1.07417	1.48167e-19	3.43752e-19
HNRNPA3P6	0.894762	1.88572	1.07554	3.52799e-25	1.02077e-24
ZDHHC1	2.32949	4.91177	1.07623	2.19518e-43	1.47059e-42
STAT1	17.8718	37.706	1.07711	7.27379e-43	4.74823e-42
CAPZA1	12.7622	26.9299	1.07733	1.55507e-73	2.61544e-71
GLI3	1.35947	2.86927	1.07764	3.40038e-21	8.43225e-21
AC084033.3	12.8846	27.1941	1.07765	2.64065e-06	3.65413e-06
RNASE6	9.69446	20.4648	1.07791	4.38516e-31	1.63767e-30
CFAP300	0.847155	1.78839	1.07797	3.41512e-06	4.69854e-06
RTP4	2.06857	4.36784	1.07828	2.51805e-28	8.27921e-28
SNRPE	25.3729	53.6264	1.07966	2.87471e-13	5.21138e-13
NCF4	3.45928	7.31446	1.08028	9.87341e-31	3.61738e-30
HEBP2	1.39082	2.94095	1.08035	1.75089e-63	6.07541e-62
CASP7	2.07917	4.39867	1.08106	8.09373e-56	1.28137e-54
CROT	4.20473	8.89625	1.08118	9.95489e-53	1.24293e-51
HAUS1	5.10377	10.7996	1.08135	5.43389e-52	6.36745e-51
MRPS15	7.17441	15.1853	1.08174	1.74399e-74	3.46279e-72
ASS1	4.67211	9.89159	1.08213	3.77599e-15	7.36447e-15
EDEM2	8.45882	17.916	1.08272	4.7054e-76	1.29362e-73
UCP2	10.1622	21.5347	1.08344	1.24725e-36	5.98949e-36
AC016596.1	6.5282	13.8371	1.08378	1.79551e-24	5.05486e-24
AC107464.3	0.910964	1.93104	1.08391	1.25113e-26	3.83e-26
HAVCR2	6.17745	13.1049	1.08503	3.39394e-32	1.32713e-31
RPL4P4	3.06173	6.5054	1.08729	5.12256e-13	9.19886e-13
ABI3	5.05797	10.7524	1.08803	8.09816e-42	5.01391e-41
CENPS	0.78363	1.66653	1.0886	2.08228e-57	3.95329e-56
AL136380.1	0.725726	1.54364	1.08883	3.51306e-36	1.65061e-35
QPCT	2.17849	4.63476	1.08916	2.2924e-28	7.54249e-28
ERRFI1	5.15539	10.9697	1.08937	4.4184e-32	1.72066e-31
AGTRAP	8.70061	18.5148	1.08949	3.69855e-59	8.15963e-58
RNF122	4.59281	9.77423	1.08961	5.87332e-29	1.98218e-28
CTBS	1.40621	2.99297	1.08977	6.88457e-52	8.02133e-51
SIGLEC14	1.88068	4.00944	1.09214	8.4635e-23	2.23154e-22
SNRPD2	44.6084	95.115	1.09236	1.45845e-57	2.79866e-56
ITPKC	5.64744	12.0447	1.09273	1.05572e-54	1.53224e-53
STK40	7.02704	14.9877	1.09279	1.99519e-66	1.01146e-64
CASC10	0.749906	1.59971	1.09303	1.7904e-38	9.37566e-38
LAMA4	3.31131	7.06746	1.09379	8.80516e-30	3.08829e-29
CCNE1	1.13674	2.42625	1.09382	3.03123e-40	1.72235e-39
AK2	9.12007	19.4666	1.09389	1.84244e-73	2.99313e-71
RHOC	33.0069	70.4604	1.09405	2.27841e-62	7.00475e-61
SPATS2L	5.3046	11.3247	1.09415	2.11583e-64	8.13117e-63
RN7SL138P	1.16668	2.49206	1.09493	2.20805e-31	8.34206e-31
RGS3	1.19356	2.55208	1.09641	4.01637e-51	4.36971e-50
PCED1B	1.09964	2.35185	1.09677	5.30088e-42	3.31357e-41
IL18	3.15637	6.75107	1.09685	3.4412e-33	1.40598e-32
BTN2A2	1.42376	3.04561	1.09703	5.65386e-61	1.53083e-59
MIR6859-1	0.87142	1.86465	1.09746	1.0689e-13	1.97275e-13
MR1	1.77113	3.7908	1.09783	6.87945e-48	6.00419e-47
PTPRC	2.0683	4.42687	1.09784	5.84841e-27	1.81679e-26
EEF1A1P6	6.50368	13.9205	1.09788	1.68727e-19	3.9069e-19
DYNLT3	4.92073	10.5345	1.09817	5.1431e-36	2.3981e-35
HIST1H4I	1.54902	3.31729	1.09865	8.99313e-40	4.99672e-39
NR2F2	2.54177	5.44334	1.09866	8.28734e-29	2.78701e-28
CNIH3	2.31037	4.94829	1.0988	3.86063e-17	8.10687e-17
TMEM67	1.00139	2.14734	1.10054	1.41709e-51	1.61553e-50
IFI35	10.2458	21.977	1.10096	1.54084e-37	7.72909e-37
TBX15	1.26189	2.70828	1.10179	5.35304e-24	1.47821e-23
AL121894.2	3.0661	6.58159	1.10203	5.24327e-12	9.05834e-12
ZWINT	3.9129	8.39996	1.10214	2.26318e-33	9.3456e-33
PLOD3	9.75714	20.9512	1.1025	7.07987e-62	2.08259e-60
TNFSF10	2.13775	4.59166	1.10293	2.00377e-24	5.62788e-24
WIPF3	1.85095	3.97725	1.10351	1.6591e-20	3.99502e-20
BX284668.4	1.31772	2.83289	1.10423	2.91491e-26	8.7896e-26
DTX3L	4.75154	10.218	1.10465	1.03383e-48	9.59096e-48
SPCS2P4	1.72986	3.72731	1.10748	3.17536e-28	1.0376e-27
DDX60L	0.833272	1.7958	1.10776	1.01477e-47	8.76567e-47
FERMT3	4.90133	10.5649	1.10803	3.92222e-39	2.12233e-38
GPR183	3.11445	6.71598	1.10862	5.15969e-25	1.48596e-24
ITGAL	1.11122	2.39675	1.10894	9.45238e-33	3.78731e-32
KDELR1	31.8204	68.7054	1.11047	2.64601e-76	8.04837e-74
ZC3H12A	0.827251	1.78636	1.11063	4.01963e-36	1.88162e-35
ERI1	1.99551	4.30962	1.1108	1.15619e-68	7.985e-67
FUCA1	7.02581	15.1747	1.11094	6.09591e-52	7.11987e-51
LCP2	2.20832	4.77094	1.11132	4.28357e-38	2.19885e-37
WARS	11.6292	25.1403	1.11225	6.24286e-42	3.8888e-41
ARC	15.5478	33.6182	1.11253	1.74618e-28	5.78257e-28
CUL7	2.7438	5.93295	1.11258	4.03434e-52	4.79425e-51
IQCG	2.11976	4.58519	1.11308	5.25942e-44	3.65704e-43
FZD5	0.782454	1.69256	1.11312	4.64337e-38	2.38183e-37
AL513477.1	0.759515	1.64446	1.11446	2.10973e-37	1.0498e-36
IFI27	7.93311	17.1778	1.11459	1.12126e-13	2.06673e-13
MAP3K20	1.53787	3.33107	1.11506	2.43177e-56	4.12881e-55
SDC4	20.547	44.5137	1.11532	1.03681e-22	2.72767e-22
RPL13AP25	4.76918	10.3331	1.11546	1.0879e-25	3.21203e-25
SELENOF	42.6256	92.3698	1.1157	8.13823e-68	4.97197e-66
EEF1A1P9	2.4394	5.28709	1.11595	1.17999e-18	2.64241e-18
POLR2L	33.9696	73.678	1.11699	3.84347e-56	6.32293e-55
PKMYT1	1.30508	2.8308	1.11707	1.22995e-29	4.27301e-29
CDC25A	1.15763	2.51103	1.1171	2.7447e-25	7.96877e-25
PLEK	4.02795	8.74044	1.11766	3.41902e-28	1.11518e-27
LILRB1	1.28826	2.79571	1.11779	1.63214e-29	5.6442e-29
SMO	7.34831	15.957	1.1187	1.73207e-49	1.68906e-48
NFAM1	1.34889	2.93242	1.12031	8.65908e-34	3.63234e-33
SIX5	0.752218	1.6362	1.12112	2.11963e-32	8.35924e-32
BTG3	9.57903	20.8417	1.12152	3.06957e-63	1.0277e-61
CRYZ	4.40561	9.58595	1.12158	9.57406e-57	1.69815e-55
F2RL1	1.6025	3.48742	1.12184	4.65147e-21	1.14829e-20
LYN	3.5842	7.80502	1.12275	1.85993e-44	1.32155e-43
NPTX2	8.55352	18.6344	1.12338	5.74263e-09	8.86381e-09
MTND5P11	0.719266	1.56822	1.12453	4.98699e-18	1.08432e-17
MIR22HG	2.29283	5.00094	1.12507	1.19886e-43	8.17308e-43
CD302	1.19146	2.59918	1.12532	1.56163e-42	1.00382e-41
RAC1P2	3.23856	7.06738	1.12582	2.37777e-42	1.51347e-41
VWA1	7.84492	17.121	1.12594	8.79879e-44	6.03587e-43
COPZ2	5.12962	11.1956	1.126	1.70797e-29	5.90214e-29
EMB	1.00906	2.20247	1.12611	1.01037e-19	2.35671e-19
MAP3K8	1.2739	2.78302	1.1274	4.55414e-22	1.17013e-21
MTRNR2L8	1.25827	2.75043	1.12821	2.25386e-12	3.95449e-12
IRAK2	1.38256	3.0221	1.12821	2.14638e-39	1.17296e-38
MAP2K3	3.41915	7.47828	1.12907	1.51189e-67	8.82202e-66
MILR1	2.04677	4.47749	1.12934	3.97362e-31	1.48515e-30
AL031729.1	1.87186	4.09757	1.1303	3.80763e-27	1.19033e-26
MAP3K6	2.54767	5.57765	1.13048	3.13563e-45	2.33231e-44
TRIP10	3.58689	7.85806	1.13144	3.8099e-64	1.4221e-62
TMEM51	4.20186	9.21068	1.13228	2.28883e-61	6.41591e-60
VMP1	8.42725	18.473	1.13228	6.28965e-62	1.85779e-60
COL18A1	5.59748	12.2795	1.13341	1.89877e-29	6.54722e-29
UGCG	5.16797	11.343	1.13413	3.42522e-57	6.35109e-56
SPATA6	3.22662	7.08244	1.13422	2.17025e-42	1.382e-41
LINC02381	4.6914	10.3003	1.13459	2.15348e-35	9.73936e-35
POLR2J4	0.783188	1.7201	1.13506	1.64914e-64	6.44156e-63
GSC	0.889233	1.95437	1.13607	2.12518e-19	4.90103e-19
HIST1H1C	14.6219	32.1408	1.13627	9.3497e-28	2.99358e-27
CDT1	2.3776	5.2273	1.13656	1.32274e-28	4.40071e-28
LYPD6	1.31209	2.8861	1.13725	4.61561e-26	1.37957e-25
STAB1	6.50008	14.299	1.13738	5.60095e-24	1.54578e-23
PSMB8-AS1	2.73216	6.01253	1.13793	1.3634e-45	1.03128e-44
TNFRSF10D	0.790187	1.73924	1.13819	2.92723e-32	1.14746e-31
C17orf53	0.681637	1.50053	1.1384	3.44671e-44	2.40949e-43
CDCA3	1.05244	2.31824	1.13929	6.42556e-40	3.5953e-39
LGALS3BP	51.5455	113.636	1.1405	3.07969e-55	4.65896e-54
ALDH1L1-AS2	1.68626	3.71931	1.14121	1.63893e-12	2.89191e-12
MORN5	1.86017	4.10323	1.14133	0.00059477	0.000737389
MICA	1.748	3.85585	1.14134	5.2825e-39	2.83798e-38
GNG11	5.02031	11.0754	1.14151	1.16336e-32	4.64825e-32
TSPO	20.1053	44.3717	1.14207	3.01629e-50	3.09776e-49
RPL3P2	0.673281	1.4862	1.14235	4.64215e-16	9.37347e-16
REEP4	4.24766	9.37742	1.14252	1.50421e-71	1.5929e-69
RPL24P4	6.48225	14.3166	1.14312	1.09182e-19	2.54444e-19
CTSB	74.4156	164.401	1.14354	5.17084e-48	4.56593e-47
TIMELESS	3.41166	7.53844	1.14379	2.65299e-42	1.68715e-41
ECE1	10.4713	23.1612	1.14527	2.05319e-56	3.50267e-55
NCF2	2.76693	6.12178	1.14567	2.00363e-35	9.07312e-35
SSH3	2.07448	4.59546	1.14746	6.24169e-48	5.47767e-47
IGFLR1	0.808181	1.79144	1.14837	1.6422e-55	2.55184e-54
PRR11	1.91157	4.23827	1.14872	3.15914e-44	2.2215e-43
HK2	4.42623	9.81386	1.14874	2.77536e-36	1.31119e-35
OS9	44.6496	99.1784	1.15138	2.33544e-18	5.15317e-18
NLRC5	1.29867	2.88504	1.15155	3.29128e-39	1.78702e-38
ZWILCH	1.42569	3.17161	1.15355	2.21665e-54	3.12826e-53
TMCO4	1.7199	3.82651	1.15371	1.20141e-45	9.12612e-45
SCIN	1.97974	4.40588	1.15412	3.65188e-23	9.76202e-23
SMIM10	2.48764	5.53747	1.15445	1.85196e-40	1.06542e-39
FPGT	1.83444	4.08352	1.15447	5.65102e-66	2.6929e-64
CEP135	0.668448	1.48998	1.1564	3.13875e-53	4.08666e-52
DCBLD2	2.0311	4.53091	1.15754	3.47386e-40	1.96683e-39
SLC49A3	0.824068	1.83831	1.15754	4.32407e-37	2.11992e-36
YBX1P10	2.47436	5.52229	1.15821	5.30508e-37	2.59021e-36
ENG	12.8829	28.7594	1.15858	2.2903e-53	3.0177e-52
DBF4	1.72525	3.85325	1.15927	4.26126e-42	2.67893e-41
RARRES3	22.4473	50.1498	1.1597	3.08279e-28	1.00781e-27
SLC35G2	2.29118	5.12091	1.16031	6.92615e-41	4.07978e-40
PLOD1	14.6788	32.8178	1.16075	1.13272e-62	3.59056e-61
RIBC1	0.924662	2.06733	1.16077	1.89476e-17	4.02788e-17
FOLR1	1.38162	3.08984	1.16117	4.74843e-26	1.41867e-25
TWSG1	7.67032	17.1548	1.16125	1.68201e-53	2.24729e-52
ECM1	2.82068	6.31142	1.16192	2.15619e-33	8.91667e-33
TREM2	36.6705	82.0713	1.16226	1.77619e-33	7.36013e-33
FHL3	7.74447	17.3381	1.16271	2.19721e-64	8.42125e-63
TRIM38	0.744893	1.66794	1.16296	7.99511e-45	5.76972e-44
HMGB2	18.3422	41.1083	1.16426	5.18132e-51	5.59035e-50
AC141557.1	2.86123	6.41281	1.16432	1.92227e-14	3.64466e-14
TRH	2.40776	5.40059	1.16543	5.48879e-09	8.48116e-09
RNASEH2A	8.46384	19.0032	1.16686	3.20171e-47	2.68771e-46
RELB	2.19529	4.93144	1.1676	4.99583e-50	5.0581e-49
WDR76	1.88281	4.23174	1.16836	1.97753e-41	1.20147e-40
NEAT1	4.23767	9.52835	1.16895	1.42007e-26	4.33883e-26
BX284668.5	2.49908	5.62229	1.16976	2.23514e-30	8.05282e-30
GAL3ST4	8.03784	18.1057	1.17156	1.41197e-59	3.25572e-58
ITGB2	10.2068	23.0154	1.17307	3.51344e-36	1.65061e-35
SNRPGP15	1.6864	3.80837	1.17523	4.33028e-28	1.40503e-27
TMEM165	5.60678	12.6667	1.17579	1.04506e-69	8.07577e-68
SPAG5	2.07532	4.69131	1.17666	3.95602e-33	1.61402e-32
PTN	200.007	452.132	1.1767	7.63608e-32	2.93771e-31
GALM	2.38062	5.3864	1.17799	4.57653e-60	1.10704e-58
PPM1M	4.03211	9.12392	1.17812	1.39043e-65	6.23122e-64
CASP3	8.52453	19.3037	1.17919	2.12963e-65	9.19793e-64
ARHGDIB	27.4061	62.1021	1.18014	6.08179e-48	5.3439e-47
AC105446.1	0.718775	1.63063	1.18182	1.29517e-12	2.29638e-12
CNN3	116.555	264.453	1.182	4.43716e-61	1.2152e-59
PTGES	1.18221	2.68337	1.18256	1.51913e-08	2.30034e-08
AK4	5.10513	11.6037	1.18456	4.32621e-32	1.6866e-31
SIRPB2	0.679509	1.54493	1.18497	8.81457e-31	3.23941e-30
RPL10P9	6.78092	15.4464	1.18772	6.21566e-14	1.15943e-13
RPL7P1	2.11365	4.81571	1.18801	5.18461e-17	1.08172e-16
EPHA3	0.931368	2.12319	1.18881	1.28748e-06	1.80431e-06
H3F3A	6.73231	15.3563	1.18966	1.23678e-31	4.71872e-31
CARD19	3.23395	7.3791	1.19015	8.83895e-52	1.01905e-50
DTYMK	8.43068	19.2382	1.19025	8.7998e-66	4.09778e-64
CD53	15.9838	36.4744	1.19028	7.67281e-35	3.38238e-34
PLA2G4A	2.31887	5.29878	1.19224	3.44427e-37	1.69615e-36
AC098934.3	0.786808	1.79837	1.19261	6.56422e-27	2.03474e-26
TNFAIP3	1.83374	4.19255	1.19304	3.42882e-39	1.85957e-38
LAPTM5	55.1356	126.102	1.19353	1.60452e-35	7.30749e-35
FES	1.8125	4.14806	1.19445	8.25192e-57	1.47831e-55
MMP25	0.65515	1.50001	1.19508	2.54766e-25	7.41175e-25
KDELR2	24.2197	55.4626	1.19534	4.1913e-75	9.66432e-73
NXT1	9.18241	21.0351	1.19585	9.67617e-57	1.71201e-55
FCGR1CP	1.39408	3.19439	1.19623	9.41133e-23	2.48054e-22
TMEM35B	1.86543	4.27495	1.1964	2.69125e-61	7.45621e-60
LMO2	12.2141	28.0447	1.19918	4.16257e-43	2.74611e-42
CENPN	1.44116	3.31364	1.20119	1.68823e-51	1.90339e-50
COLGALT1	9.2757	21.3415	1.20214	3.87561e-71	3.98602e-69
PAMR1	5.22288	12.0182	1.20231	1.78717e-25	5.22374e-25
TRIM21	4.48861	10.3296	1.20244	3.95863e-55	5.91354e-54
WFDC2	0.838073	1.92965	1.20319	3.11335e-28	1.01757e-27
SLC39A8	2.2791	5.24882	1.20353	2.28002e-40	1.30433e-39
AC073611.1	0.749517	1.72803	1.2051	8.63925e-41	5.05554e-40
RBPMS	0.824006	1.90031	1.2055	6.94915e-35	3.06905e-34
ADA2	4.07876	9.41164	1.20632	2.47559e-38	1.28461e-37
HAS2	1.75526	4.05176	1.20687	1.72805e-31	6.54588e-31
STK17A	6.64112	15.3308	1.20693	2.79381e-53	3.65419e-52
AP001024.1	0.764613	1.76603	1.20771	2.80864e-24	7.84531e-24
AC099850.3	2.45663	5.67479	1.20789	3.93387e-40	2.22287e-39
MSC	0.767122	1.77271	1.20843	2.27472e-08	3.42058e-08
ELK3	4.45259	10.2915	1.20873	8.65142e-61	2.27773e-59
AC027307.2	2.47522	5.7238	1.20942	1.16076e-59	2.70263e-58
GBP4	1.99725	4.6196	1.20975	5.71858e-17	1.19034e-16
C1orf53	2.5303	5.8528	1.20982	7.41577e-45	5.36789e-44
NRM	4.94503	11.4431	1.21043	1.09301e-54	1.58315e-53
C2orf40	1.47782	3.42009	1.21056	5.22388e-17	1.08959e-16
IFIH1	2.36968	5.48534	1.21089	8.13853e-41	4.77621e-40
RAP1B	1.35941	3.14832	1.2116	9.6157e-63	3.0822e-61
SMS	18.2056	42.1828	1.21227	3.27693e-64	1.23607e-62
NXPH4	1.86243	4.31791	1.21314	4.7966e-18	1.04356e-17
NID1	9.20901	21.3584	1.21368	4.24595e-28	1.37798e-27
PROCR	3.67116	8.52663	1.21574	1.00127e-49	9.9266e-49
LTBP1	4.12071	9.57327	1.21612	5.1317e-29	1.73599e-28
CENPL	0.867645	2.01623	1.21648	4.81157e-64	1.77742e-62
AC098613.1	0.741813	1.72583	1.21816	7.77566e-30	2.73593e-29
CPNE8	0.853381	1.98543	1.21819	4.33722e-19	9.86397e-19
DUSP10	2.14927	5.00981	1.22091	3.71788e-55	5.57137e-54
SNX10	7.39592	17.2567	1.22235	3.49438e-24	9.72658e-24
TMEM220	1.0417	2.43128	1.22278	6.09346e-42	3.79739e-41
SASH3	4.66148	10.8826	1.22316	2.94269e-40	1.67604e-39
EFNA4	1.38076	3.22736	1.2249	3.64092e-55	5.4675e-54
ARPC1B	10.1714	23.7922	1.22597	5.02907e-50	5.08456e-49
RFC2	10.0467	23.5064	1.22633	9.17655e-72	1.04117e-69
MT1E	30.3129	70.9356	1.22658	6.42755e-30	2.27109e-29
CENPV	5.11475	11.9792	1.22779	1.19377e-15	2.37358e-15
APLN	16.2898	38.1946	1.2294	1.40271e-29	4.86256e-29
PTGS2	0.866672	2.03259	1.22976	1.06963e-12	1.90097e-12
GLA	4.81271	11.2961	1.2309	6.01725e-83	2.15057e-79
AC002398.1	0.906239	2.12718	1.23098	1.43248e-56	2.48831e-55
CAPN5	8.54316	20.054	1.23105	2.85229e-51	3.14389e-50
B2M	252.221	592.338	1.23173	5.40958e-50	5.45768e-49
FXYD5	5.58924	13.13	1.23214	1.43642e-46	1.16083e-45
MEIS1	1.05858	2.48707	1.23232	2.41333e-39	1.31432e-38
BUB1B	1.3822	3.25055	1.23372	1.96463e-43	1.31985e-42
LEFTY2	1.58192	3.72026	1.23373	2.02216e-24	5.67842e-24
DSN1	3.29058	7.74014	1.23402	1.30702e-63	4.60226e-62
SNRPEP2	1.39998	3.29691	1.23571	2.53554e-15	4.98119e-15
HAPLN3	1.10453	2.6043	1.23747	2.00504e-42	1.27965e-41
B3GALT5-AS1	0.680115	1.60486	1.2386	4.66179e-23	1.24199e-22
P4HA2	1.08296	2.55664	1.23927	1.85196e-40	1.06542e-39
CAPS	4.64454	10.9664	1.23949	3.00483e-20	7.14996e-20
EEF1A1P19	1.93271	4.5656	1.24018	4.17598e-22	1.07432e-21
MYCBP	1.78299	4.2129	1.24051	2.21334e-70	1.92938e-68
AL117332.1	0.75832	1.79222	1.24087	4.81157e-64	1.77742e-62
GAP43	88.5354	209.47	1.24242	5.63249e-33	2.28043e-32
TRIM5	2.01766	4.77658	1.2433	4.29972e-53	5.52281e-52
ATF5	6.16559	14.6043	1.24408	2.44897e-59	5.54842e-58
SEL1L3	2.31692	5.49203	1.24513	1.35108e-40	7.82619e-40
SUB1P1	0.707802	1.67821	1.24551	1.86453e-39	1.02324e-38
EEF1A1P11	2.64933	6.28259	1.24573	1.84428e-18	4.08835e-18
TAP1	11.5082	27.2996	1.24621	5.7887e-41	3.4253e-40
RNY1	0.816141	1.93612	1.24628	5.82585e-08	8.61731e-08
TRIM22	5.63401	13.3873	1.24864	1.28296e-36	6.15272e-36
CPM	3.71948	8.83891	1.24877	2.10021e-18	4.64489e-18
TRAF5	0.667828	1.58915	1.2507	1.53124e-55	2.38719e-54
DUSP23	6.85967	16.3239	1.25077	3.31282e-46	2.61225e-45
SPA17	1.4088	3.35305	1.25101	3.5734e-42	2.25046e-41
ST20	0.997711	2.37472	1.25107	1.03492e-49	1.0246e-48
IGFBP6	4.25288	10.1529	1.25537	1.37874e-16	2.82789e-16
TLR2	3.07918	7.35604	1.25638	1.63149e-35	7.42324e-35
SWAP70	3.08784	7.37966	1.25695	1.73335e-56	2.98553e-55
CHEK1	1.22619	2.93194	1.25768	1.91533e-55	2.95697e-54
RPS27AP16	6.2685	14.9897	1.25778	6.43661e-22	1.64464e-21
HRASLS5	0.730269	1.75006	1.26091	2.93225e-18	6.44618e-18
GMFG	6.20535	14.8763	1.26143	2.6734e-47	2.25481e-46
FILIP1L	2.1093	5.05729	1.2616	4.27525e-36	1.99866e-35
KHNYN	1.42582	3.42001	1.2622	5.18257e-52	6.09795e-51
C7orf31	0.835159	2.00361	1.26248	3.36715e-48	3.01043e-47
ADAMTS1	2.56626	6.15697	1.26256	2.75573e-29	9.42712e-29
CYR61	19.5169	46.8288	1.26267	1.02321e-22	2.69291e-22
C1QTNF6	1.19325	2.8649	1.26358	9.09343e-36	4.19625e-35
LINC01778	0.899092	2.15931	1.26403	2.71927e-25	7.89974e-25
ITGB3BP	1.18531	2.84785	1.2646	1.59475e-65	7.08029e-64
PCED1B-AS1	1.66284	3.99586	1.26486	3.1228e-36	1.47144e-35
LRR1	1.52398	3.66222	1.26487	7.98157e-63	2.56992e-61
PLS3	6.64148	15.9644	1.26528	2.92571e-47	2.4618e-46
FAM221A	0.814841	1.95867	1.26528	6.71063e-49	6.30323e-48
MXD3	1.22742	2.95279	1.26645	3.57307e-36	1.67752e-35
MYO5C	0.690577	1.66212	1.26715	8.04721e-16	1.61102e-15
IFNGR2	13.229	31.8544	1.26779	7.8849e-74	1.37467e-71
KIF15	1.33626	3.21857	1.26822	5.43144e-34	2.30341e-33
IMPA2	0.74969	1.80602	1.26845	1.86166e-52	2.27472e-51
ANKRD45	0.655611	1.57955	1.2686	4.07965e-20	9.65448e-20
FCGR1A	3.55151	8.56031	1.26923	6.20286e-30	2.19549e-29
FCHSD1	0.999381	2.41014	1.27001	8.97901e-58	1.75121e-56
AC020916.1	1.90398	4.59219	1.27017	4.34908e-32	1.69505e-31
CHIC2	6.91548	16.6797	1.27019	1.86237e-49	1.81242e-48
RYR3	0.675112	1.62963	1.27135	7.04489e-14	1.31052e-13
CD300C	1.0392	2.5098	1.2721	1.90368e-37	9.50575e-37
FGL2	3.01051	7.272	1.27234	1.66051e-38	8.71146e-38
SMYD2	3.4005	8.21825	1.27308	2.90639e-42	1.8442e-41
INAFM1	7.12603	17.2229	1.27315	1.59212e-53	2.13118e-52
TECRP1	2.36957	5.72816	1.27344	7.60633e-36	3.52252e-35
EME1	0.821005	1.98528	1.27388	7.10368e-40	3.96387e-39
CD40	1.46782	3.55436	1.27592	1.10371e-48	1.02127e-47
LMO1	2.46619	5.97256	1.27607	2.06005e-10	3.35963e-10
CDCA5	2.60212	6.30737	1.27735	3.20402e-34	1.37551e-33
MXRA8	6.37479	15.4524	1.27739	3.259e-44	2.28722e-43
EPHB4	2.4369	5.90998	1.27811	3.90888e-46	3.06704e-45
CRYGS	1.44146	3.50028	1.27994	3.96842e-13	7.16139e-13
SUMO1P3	0.630117	1.53053	1.28034	6.89747e-31	2.54994e-30
HTATIP2	2.38551	5.79724	1.28107	4.9876e-32	1.93442e-31
OSCAR	1.44489	3.51142	1.2811	4.53416e-40	2.55098e-39
STK32B	1.51211	3.67485	1.28112	1.63214e-29	5.6442e-29
FAM126A	1.40614	3.41752	1.28121	1.21242e-59	2.81834e-58
FAM111A	2.418	5.88095	1.28223	1.81696e-68	1.21949e-66
SERTAD1	4.72406	11.4917	1.28249	2.95378e-52	3.55448e-51
HEXB	6.76685	16.4662	1.28295	1.07558e-67	6.43368e-66
SCIMP	0.703607	1.71298	1.28367	2.46294e-40	1.40616e-39
PSMB8	16.221	39.5235	1.28485	1.84259e-51	2.07089e-50
CENPH	2.47118	6.02292	1.28527	1.60689e-45	1.21224e-44
UBE2MP1	0.747965	1.82381	1.28592	2.63848e-36	1.24817e-35
LPAR6	3.29884	8.049	1.28685	4.96091e-58	9.86386e-57
OPLAH	1.20516	2.94155	1.28735	4.85797e-32	1.88465e-31
ITGA1	0.831137	2.02912	1.2877	8.12959e-39	4.32368e-38
DNALI1	6.40395	15.6434	1.28852	4.97639e-52	5.86017e-51
CBR1	20.0572	49.0814	1.29106	5.22402e-43	3.43526e-42
PLK3	2.5667	6.28335	1.29162	4.63244e-66	2.22981e-64
PPCS	4.65596	11.4235	1.29485	1.82898e-65	7.97165e-64
CHST2	5.5893	13.7184	1.29538	3.28132e-46	2.58884e-45
PPIA	54.1191	132.943	1.29659	1.14787e-48	1.06008e-47
BTBD19	0.807815	1.98454	1.29671	4.52448e-46	3.53068e-45
HLA-C	125.19	307.641	1.29713	1.73651e-44	1.23632e-43
S1PR3	3.7156	9.13645	1.29804	1.72594e-43	1.16497e-42
S100A2	0.974225	2.39799	1.2995	6.12706e-43	4.01616e-42
IRF7	3.73919	9.20572	1.29981	3.59496e-47	3.00723e-46
FTH1P3	0.977864	2.40877	1.30059	7.274e-36	3.37408e-35
IFITM2	13.4746	33.1941	1.30069	2.13841e-41	1.29427e-40
RPS27AP11	0.620786	1.53045	1.30179	1.26459e-21	3.20145e-21
CD300A	3.62244	8.93111	1.30188	5.2825e-39	2.83798e-38
GCH1	0.652175	1.61055	1.30422	3.35527e-46	2.64426e-45
CXCR4	11.04	27.2681	1.30448	1.00534e-35	4.62728e-35
PQLC3	2.8493	7.03995	1.30496	7.73678e-62	2.27115e-60
DDIT3	20.6823	51.1085	1.30516	1.79599e-21	4.52033e-21
TLR1	1.12394	2.78239	1.30775	3.03018e-41	1.81633e-40
SLC7A7	2.31727	5.73804	1.30813	5.00873e-46	3.88945e-45
FANCD2	0.834096	2.06784	1.30984	8.53499e-46	6.54242e-45
SPRED3	1.23167	3.05369	1.30994	8.97513e-31	3.29672e-30
ORC6	0.977493	2.42357	1.30998	1.22109e-38	6.44398e-38
FZD7	4.87901	12.1016	1.31053	9.51844e-32	3.64131e-31
SAT1	54.0227	134.008	1.31068	3.24271e-54	4.52271e-53
MDFIC	2.19225	5.43811	1.31069	5.80606e-30	2.05964e-29
HIST1H2AE	1.45113	3.60178	1.31153	7.46898e-26	2.21482e-25
EZH2	3.14514	7.80766	1.31177	4.44612e-42	2.78902e-41
AC015922.2	2.35016	5.83791	1.31269	1.43627e-36	6.86947e-36
HIST1H4H	1.49219	3.70886	1.31354	1.82619e-18	4.04952e-18
PROS1	5.72068	14.2248	1.31415	8.4675e-39	4.50173e-38
RPL7AP50	0.905528	2.25745	1.31786	7.06618e-23	1.87174e-22
AC133065.3	0.746768	1.86262	1.3186	2.85423e-37	1.41044e-36
HLX	0.646285	1.61203	1.31864	1.10774e-36	5.33387e-36
MIR3151	1.93139	4.8194	1.31922	3.19436e-15	6.2497e-15
AL441992.1	0.883085	2.20848	1.32243	3.27291e-60	8.06717e-59
LAIR1	2.49918	6.25504	1.32356	6.40878e-38	3.26398e-37
PDLIM7	3.77364	9.45383	1.32494	7.92517e-56	1.25887e-54
C1QC	108.722	272.589	1.32609	2.19572e-37	1.09183e-36
SPRY2	15.4314	38.7085	1.32678	6.69919e-44	4.62218e-43
UNC93B1	4.04823	10.1574	1.32716	3.04676e-56	5.07652e-55
AL445524.1	0.694563	1.7432	1.32756	1.6289e-71	1.71227e-69
NPC2	28.4329	71.3681	1.32772	4.07082e-53	5.24766e-52
MYO1B	1.78633	4.4847	1.32801	8.42776e-34	3.53738e-33
GAS1	6.26718	15.7372	1.32829	1.78717e-25	5.22374e-25
E2F1	4.49359	11.2874	1.32877	1.32445e-38	6.98424e-38
KPNA2	14.0819	35.3985	1.32985	2.6826e-62	8.15967e-61
MICALL2	2.62911	6.61404	1.33096	1.84345e-50	1.92224e-49
ALPK3	0.744418	1.87308	1.33123	1.78314e-35	8.09264e-35
RCN3	3.44374	8.66853	1.33181	7.21655e-44	4.96955e-43
SYDE1	3.95468	9.95629	1.33205	1.76955e-73	2.90775e-71
PCOLCE2	1.1874	2.98978	1.33223	3.99237e-12	6.92825e-12
MEIS3P1	1.30319	3.28442	1.3336	1.12385e-35	5.1661e-35
LTBR	1.69176	4.2657	1.33426	4.42405e-56	7.22815e-55
YBX3	4.16966	10.5187	1.33495	1.61401e-52	1.98571e-51
DCTD	8.1612	20.6021	1.33594	6.72206e-72	7.87693e-70
SLC25A43	1.8097	4.56934	1.33623	1.48753e-52	1.83325e-51
SEMA3E	0.721983	1.82392	1.337	4.65701e-14	8.71992e-14
SPEF1	1.56891	3.96465	1.33743	2.27473e-16	4.64102e-16
CYBA	8.99637	22.741	1.33788	1.81324e-48	1.6448e-47
ZNF217	1.73476	4.38565	1.33806	4.71849e-58	9.44756e-57
GUSB	7.39941	18.7593	1.34213	3.89333e-79	2.65043e-76
MTMR11	2.14163	5.43006	1.34226	9.86533e-59	2.1113e-57
SCGB1D2	0.696644	1.76642	1.34234	6.46078e-21	1.58319e-20
RPA3	3.29801	8.36277	1.34238	1.50268e-70	1.35964e-68
MUC1	1.15172	2.92228	1.34331	3.43352e-48	3.06593e-47
GIMAP2	2.49323	6.32747	1.34362	2.63209e-55	4.01583e-54
C1orf54	5.70215	14.473	1.34378	1.67991e-58	3.52658e-57
TTYH3	22.3332	56.687	1.34383	1.04411e-52	1.30136e-51
LYPLA1	5.11389	12.9932	1.34526	1.0581e-57	2.04413e-56
ACCS	0.66669	1.69469	1.34594	6.14207e-44	4.24393e-43
TYROBP	43.6392	111.002	1.34689	2.41948e-40	1.383e-39
RGN	2.7892	7.10958	1.34991	1.95132e-27	6.17305e-27
CNN1	0.688469	1.75492	1.34994	4.95505e-17	1.03473e-16
RBM47	0.704905	1.7978	1.35073	2.60843e-43	1.73846e-42
ATF3	4.12311	10.5176	1.35101	2.99401e-41	1.79616e-40
PTGES3P1	5.71034	14.5694	1.35129	1.92417e-47	1.63543e-46
PLK4	0.76548	1.95549	1.3531	8.92059e-42	5.50642e-41
PRDX4	20.2418	51.719	1.35336	2.73962e-51	3.03374e-50
SRGN	42.3071	108.233	1.35517	9.54904e-30	3.33773e-29
CDH6	1.12626	2.88438	1.35673	9.65596e-33	3.8678e-32
FLNA	28.4251	72.8517	1.3578	1.76479e-53	2.34911e-52
NRP1	2.51518	6.44697	1.35796	6.96851e-43	4.55518e-42
P3H1	1.98239	5.08292	1.35842	9.0951e-75	1.97005e-72
FTL	1290.82	3309.73	1.35842	2.58891e-49	2.50075e-48
LRRC17	3.69851	9.49064	1.35956	2.38983e-21	5.97812e-21
AC007969.1	7.69925	19.759	1.35972	2.85175e-33	1.1705e-32
PPP1R3B	1.49513	3.83743	1.35987	7.15414e-55	1.05006e-53
SUMF2	22.1331	56.8169	1.36011	3.72445e-53	4.81417e-52
CARD8-AS1	0.846777	2.17398	1.36029	1.80134e-65	7.87523e-64
TMEM221	0.922139	2.36795	1.36058	5.54955e-26	1.65353e-25
ADGRL2	2.28349	5.87281	1.36281	1.62628e-30	5.89935e-30
NMNAT3	1.2863	3.31229	1.36459	1.00058e-36	4.83416e-36
CMPK2	1.50469	3.87468	1.36461	2.67177e-28	8.76651e-28
CDK6	3.37246	8.68995	1.36555	4.48581e-24	1.24329e-23
PARP9	3.51017	9.04494	1.36557	1.10982e-60	2.87427e-59
ARSE	0.811751	2.09182	1.36565	7.84619e-45	5.6651e-44
RPL35P1	1.49187	3.84612	1.36628	3.41902e-28	1.11518e-27
AC092718.4	2.38873	6.16374	1.36756	1.56342e-58	3.28685e-57
CALD1	9.71315	25.0921	1.36922	5.74892e-63	1.86788e-61
MREG	3.74746	9.68692	1.37013	7.04632e-42	4.37595e-41
LMNB1	5.9281	15.3253	1.37027	2.09662e-39	1.14665e-38
ALOX5	2.75064	7.11208	1.37051	5.91574e-40	3.31523e-39
UQCRHL	1.42366	3.68309	1.37131	7.9303e-35	3.49158e-34
HLA-A	143.795	372.27	1.37233	1.95761e-51	2.19843e-50
FAAP24	0.600809	1.55572	1.3726	9.07412e-76	2.35861e-73
RAMP3	6.51509	16.8839	1.37379	2.99241e-20	7.12161e-20
CLEC7A	1.25676	3.25822	1.37438	8.87082e-39	4.71089e-38
PCNA	31.4173	81.4904	1.37507	1.64407e-65	7.25421e-64
LAMC3	1.27445	3.30667	1.37551	3.75167e-38	1.93205e-37
HERC5	1.95895	5.08329	1.37568	2.41689e-44	1.70711e-43
TGFB1I1	2.38783	6.19996	1.37656	1.61345e-50	1.68981e-49
ITGA2	1.21013	3.14225	1.37663	8.13572e-40	4.52914e-39
SPHK1	1.39556	3.62408	1.37677	1.09516e-28	3.65718e-28
PAXIP1-AS2	1.1879	3.08509	1.3769	1.97372e-48	1.78697e-47
S100A16	47.4237	123.188	1.37718	1.34627e-45	1.01886e-44
TFRC	6.38018	16.5771	1.37752	3.84977e-55	5.75694e-54
LRRC2	0.661032	1.72012	1.37972	2.15037e-18	4.75289e-18
NEK6	9.75948	25.3971	1.37979	3.42702e-54	4.77047e-53
LZTS1	3.69717	9.6243	1.38026	9.14279e-27	2.81693e-26
ADPRH	1.04482	2.72047	1.3806	3.20367e-64	1.21163e-62
WWTR1	6.79653	17.7174	1.3823	7.84619e-45	5.6651e-44
SGO2	0.794249	2.07065	1.38242	2.13258e-52	2.59466e-51
GBP2	5.13679	13.4101	1.38438	3.32861e-34	1.42772e-33
FOXS1	0.922339	2.40816	1.38456	5.35545e-41	3.17551e-40
CTSZ	26.6403	69.6593	1.38671	1.44287e-48	1.31888e-47
CD63	123.649	323.423	1.38718	2.711e-66	1.3504e-64
RPS3AP47	0.809574	2.12045	1.38913	5.00439e-23	1.33128e-22
SLC2A4RG	6.83877	17.914	1.38928	2.14163e-72	2.83488e-70
TPPP3	14.2851	37.4298	1.38967	3.45855e-21	8.57203e-21
CA2	25.4253	66.6199	1.38969	7.70002e-45	5.57082e-44
ANTXR2	1.13792	2.98406	1.39088	7.92517e-56	1.25887e-54
HIST1H3E	0.676913	1.7762	1.39175	2.18456e-40	1.25222e-39
PLOD2	4.44084	11.6819	1.39538	7.218e-52	8.40298e-51
CDCA4	1.78053	4.68607	1.39608	2.20952e-51	2.46969e-50
THNSL2	0.960218	2.52742	1.39623	7.79627e-14	1.44729e-13
JAG1	5.31423	14.0028	1.39778	5.78417e-47	4.77427e-46
SLC16A4	3.20618	8.45252	1.39853	2.6734e-47	2.25481e-46
EFNB2	4.16209	10.9782	1.39927	7.34025e-48	6.38687e-47
TRBC2	0.74749	1.97173	1.39934	9.8916e-24	2.70125e-23
OLFML2B	4.16704	11.0008	1.40051	1.57302e-31	5.96656e-31
DYRK3	0.796099	2.10389	1.40204	2.24858e-70	1.94822e-68
GLMP	3.69924	9.77891	1.40245	1.50822e-75	3.6545e-73
RBMS1	1.33005	3.52078	1.40442	2.17077e-66	1.09272e-64
EFEMP1	30.9178	81.8822	1.40511	1.87762e-30	6.78526e-30
CDCA7	2.2165	5.88459	1.40866	2.21332e-40	1.26769e-39
AC064799.1	0.844056	2.24328	1.4102	5.8333e-19	1.32118e-18
ZDHHC23	0.635236	1.68858	1.41045	8.71069e-29	2.92594e-28
SHC1	7.14434	19.001	1.4112	6.85214e-64	2.48625e-62
RPS20P14	1.67527	4.45705	1.41169	1.27834e-26	3.91164e-26
HSD3B7	1.42681	3.80053	1.41341	1.03145e-60	2.69081e-59
OSTC	13.2864	35.3936	1.41354	1.81621e-80	2.36042e-77
PRC1	3.08935	8.23666	1.41475	1.27275e-39	7.03604e-39
ETNK2	2.68826	7.17033	1.41537	8.31429e-16	1.66332e-15
RPS15AP1	2.07183	5.53197	1.41689	6.70303e-28	2.15777e-27
MYD88	4.28007	11.4307	1.41721	3.97533e-66	1.94628e-64
DLX1	1.06787	2.85203	1.41726	5.09596e-11	8.49288e-11
MIR210HG	1.01233	2.70436	1.4176	6.53156e-25	1.87125e-24
CHEK2	0.720788	1.92864	1.41994	1.69491e-65	7.45553e-64
MPZ	1.00816	2.70095	1.42174	5.29917e-22	1.35887e-21
AC015922.3	2.14277	5.74302	1.42233	1.33168e-43	9.04831e-43
AL645924.1	0.615473	1.64966	1.4224	3.76385e-06	5.16391e-06
BAALC-AS1	1.40006	3.7534	1.42271	4.6198e-29	1.56578e-28
CDC42EP5	0.676773	1.81791	1.42554	3.89816e-34	1.6695e-33
EEF1A1P13	3.27918	8.81031	1.42586	3.3048e-20	7.84678e-20
TMSB15A	6.14124	16.5003	1.42589	0.0238058	0.0268652
AP001453.2	0.701815	1.8864	1.42647	1.13765e-37	5.73884e-37
ELN	10.5135	28.2849	1.42778	1.96463e-43	1.31985e-42
AC093726.1	1.76093	4.73998	1.42855	3.35694e-43	2.22592e-42
LRRC32	1.60624	4.32431	1.42879	4.89666e-39	2.63763e-38
AL450998.1	1.42662	3.84243	1.42942	1.47539e-26	4.5059e-26
ACAA2	4.113	11.0895	1.43093	2.09715e-57	3.97625e-56
F11R	1.39206	3.7536	1.43105	1.11859e-56	1.95733e-55
CCDC152	0.631051	1.70231	1.43167	2.22463e-27	7.01905e-27
DOK3	1.2752	3.44293	1.43292	2.34562e-55	3.59025e-54
JAK3	0.683502	1.84646	1.43374	1.82063e-31	6.89475e-31
ENTPD2	3.61409	9.76416	1.43386	6.21491e-06	8.43924e-06
HIST1H4E	0.829274	2.24287	1.43542	4.02083e-13	7.25322e-13
RPL7AP66	0.626384	1.69531	1.43643	1.0678e-23	2.91433e-23
C1QA	79.559	215.418	1.43704	5.48885e-37	2.67719e-36
CCT6A	39.3545	106.578	1.43731	1.10654e-45	8.42785e-45
FO393411.1	1.21813	3.30926	1.44184	1.49485e-20	3.60621e-20
PNPLA4	1.69698	4.61052	1.44196	2.89808e-33	1.18781e-32
IQGAP1	4.9673	13.5017	1.44261	2.42367e-64	9.2151e-63
CTSS	7.10067	19.3435	1.44582	1.64829e-39	9.07702e-39
CYTIP	0.623598	1.6988	1.44582	5.13568e-41	3.04646e-40
COL9A3	4.61232	12.5674	1.44612	1.57506e-18	3.50241e-18
HLA-B	140.033	381.558	1.44614	2.12049e-48	1.91622e-47
FNDC3B	1.24906	3.40564	1.44708	4.28715e-69	3.127e-67
ZBTB42	0.897342	2.44692	1.44724	6.28657e-56	1.01781e-54
SLC22A18	0.729992	1.99073	1.44734	7.26277e-42	4.5084e-41
MYOF	2.23615	6.10282	1.44846	6.33521e-46	4.89558e-45
AC112491.1	0.96556	2.6352	1.44847	4.19399e-28	1.36236e-27
CKS1B	2.58418	7.0528	1.44849	9.26778e-60	2.20453e-58
ECM2	2.97868	8.13471	1.44942	4.06198e-37	1.99416e-36
TFPI	1.08098	2.95373	1.45019	1.73431e-35	7.8785e-35
TPM4	16.1648	44.1744	1.45036	5.58748e-65	2.30198e-63
TMEM45A	1.31627	3.59887	1.45109	9.88047e-35	4.32622e-34
FUCA2	6.74958	18.4565	1.45126	5.52248e-68	3.44757e-66
OLFML3	10.7123	29.3167	1.45245	2.96402e-54	4.14615e-53
DUSP6	6.21718	17.0249	1.45332	2.16191e-45	1.61815e-44
TCIRG1	2.96265	8.11313	1.45337	3.44064e-59	7.62595e-58
C3	48.4829	132.771	1.4534	2.88694e-37	1.42611e-36
SERPINB1	4.46814	12.2384	1.45366	1.9423e-55	2.99214e-54
PPIAP29	2.27637	6.23702	1.45412	7.28073e-34	3.06043e-33
MCAM	6.96923	19.0994	1.45446	2.54126e-57	4.78024e-56
SERPINB8	1.32965	3.64659	1.4555	9.64346e-66	4.46158e-64
MAD2L1	1.78644	4.89986	1.45565	9.65189e-40	5.35442e-39
FANCI	1.70794	4.68582	1.45604	1.07258e-43	7.32613e-43
COL22A1	1.19591	3.28472	1.45766	3.31415e-30	1.18685e-29
TGFB2-AS1	1.9045	5.23207	1.45797	6.50066e-45	4.72943e-44
RPS13P2	1.83108	5.03215	1.45848	2.4628e-20	5.88469e-20
S100A13	7.71942	21.2211	1.45894	1.60377e-38	8.41685e-38
DUSP5	2.42667	6.67609	1.46003	6.07897e-37	2.95897e-36
RPL7AP30	0.775922	2.13485	1.46015	1.17808e-20	2.85601e-20
TSFM	9.2629	25.5357	1.46298	7.1797e-05	9.30393e-05
PSMB9	5.43463	15.0081	1.46548	9.20425e-52	1.05945e-50
LRRC25	1.80479	4.98411	1.4655	2.52211e-40	1.43879e-39
ZMYND12	0.690376	1.90655	1.46551	3.877e-34	1.66094e-33
FTH1P20	3.49216	9.65088	1.46654	5.54356e-40	3.11031e-39
IL1R1	1.18888	3.28586	1.46667	1.09022e-17	2.33565e-17
MAN1C1	3.90915	10.809	1.46731	3.4103e-35	1.52689e-34
AL009174.1	1.43472	3.96891	1.46798	7.90606e-20	1.85439e-19
AL671277.1	2.93038	8.1076	1.46819	1.25925e-27	4.01657e-27
RAB27A	0.770251	2.13276	1.46932	3.21043e-63	1.06984e-61
ACTA2	8.71024	24.1332	1.47023	4.38516e-31	1.63767e-30
DPY19L1	8.62025	23.8964	1.47099	1.06486e-65	4.87924e-64
TNFAIP2	3.18929	8.84928	1.47233	1.15343e-33	4.81723e-33
BATF2	1.38526	3.84394	1.47243	1.28292e-31	4.89082e-31
LTBP2	1.06	2.94161	1.47255	1.97689e-29	6.81002e-29
ZDHHC12	2.35721	6.54646	1.47363	1.02782e-70	9.54138e-69
RPL15P3	4.5831	12.7453	1.47557	7.3851e-23	1.95441e-22
SRP14P2	0.641798	1.78481	1.47558	4.41624e-29	1.49785e-28
ARHGAP11A	1.0059	2.79988	1.47688	1.27179e-45	9.64535e-45
MYL9	8.09176	22.5316	1.47743	9.65189e-40	5.35442e-39
RPL29P11	0.716592	1.9955	1.47753	2.79755e-18	6.15668e-18
GDPD2	3.56834	9.94155	1.47822	9.18588e-31	3.37154e-30
NID2	0.922234	2.57127	1.47928	4.82308e-33	1.9605e-32
NR2E1	2.44372	6.81508	1.47965	2.76571e-28	9.06848e-28
EHD2	8.53085	23.8202	1.48142	1.42645e-53	1.91479e-52
CCDC89	0.640999	1.79028	1.48179	5.07456e-41	3.0127e-40
HLA-DMA	11.6255	32.5049	1.48336	7.28847e-50	7.29664e-49
IL32	2.03848	5.70319	1.48428	1.63638e-34	7.10406e-34
CTF1	1.41126	3.95166	1.48547	9.11143e-57	1.62213e-55
EPHA2	1.47674	4.13708	1.4862	1.91766e-45	1.44061e-44
IER5L	2.45062	6.86548	1.48622	1.7225e-45	1.29604e-44
ISLR	4.12059	11.5516	1.48717	2.49804e-14	4.71695e-14
SIGLEC1	1.10255	3.0918	1.4876	6.14436e-19	1.39031e-18
GLRX	2.13665	5.99347	1.48804	1.85813e-57	3.54184e-56
VSIG4	25.3638	71.1859	1.48882	9.9809e-25	2.84124e-24
TNFRSF19	3.92356	11.017	1.4895	2.81423e-51	3.10674e-50
CD276	7.68471	21.5869	1.49009	1.68586e-73	2.80245e-71
CENPW	1.99242	5.61357	1.4944	4.1566e-49	3.95887e-48
BX679664.3	1.40357	3.96035	1.49653	2.3613e-19	5.43506e-19
PIRT	2.00386	5.65905	1.49778	2.12853e-28	7.013e-28
FZD1	1.98577	5.61386	1.49929	3.34531e-60	8.21727e-59
EYA2	2.71104	7.66961	1.50031	2.15359e-32	8.49081e-32
NGFR	3.80239	10.7573	1.50033	1.62245e-35	7.38681e-35
PDIA4	23.792	67.3134	1.50042	2.71835e-75	6.47691e-73
E2F2	0.608285	1.72136	1.50073	2.78047e-34	1.19656e-33
RPL14P1	3.93986	11.1685	1.50322	5.07324e-26	1.51319e-25
C1QB	97.1488	275.394	1.50323	1.39442e-41	8.53366e-41
RPS6P25	0.591641	1.68247	1.50778	1.49004e-28	4.94238e-28
TES	0.701891	1.99694	1.50847	1.64571e-54	2.34333e-53
FKBP10	16.2021	46.1167	1.50911	1.93626e-67	1.12068e-65
RPL22P1	1.98497	5.65699	1.51092	1.05564e-26	3.24617e-26
COX20P1	1.65154	4.70759	1.51118	6.79421e-10	1.08513e-09
AL121820.2	1.35606	3.86744	1.51195	1.29312e-32	5.15372e-32
ELOVL2	8.011	22.8476	1.51199	9.49327e-17	1.96008e-16
CXCL3	0.563256	1.60735	1.51283	0.000907685	0.00111346
HLA-DRB6	5.15857	14.7233	1.51306	1.39563e-29	4.83918e-29
RPL18AP3	11.695	33.3926	1.51364	5.28081e-24	1.45939e-23
TCF19	2.60025	7.4291	1.51454	7.74253e-57	1.3888e-55
PRPS2	2.90865	8.31327	1.51507	4.17778e-58	8.45971e-57
CHST6	1.833	5.23974	1.51529	3.71599e-41	2.21904e-40
ZYX	32.2524	92.2538	1.5162	2.95321e-65	1.26027e-63
CRISPLD1	9.51462	27.2201	1.51646	2.30392e-46	1.83594e-45
CRB2	3.49704	10.0097	1.51719	4.3673e-25	1.26004e-24
ELF4	0.896661	2.5667	1.51728	7.63084e-53	9.6115e-52
AC044787.1	0.689889	1.97502	1.51743	1.21673e-21	3.08137e-21
GNG5	28.3719	81.2248	1.51746	1.15274e-77	5.14986e-75
TTC26	1.03173	2.95581	1.51848	7.47963e-75	1.67076e-72
HDHD3	2.20207	6.31938	1.52092	4.77838e-52	5.63628e-51
MIR616	0.644609	1.85063	1.52152	4.04079e-11	6.75718e-11
ECSCR	1.28371	3.68659	1.52196	1.27179e-45	9.64535e-45
C5orf49	1.31714	3.78473	1.52278	6.70016e-10	1.07059e-09
TNFRSF14	1.55392	4.46769	1.52362	1.19152e-64	4.7055e-63
ECT2	1.82317	5.24677	1.52498	7.27502e-53	9.18761e-52
CASP8	0.584139	1.68153	1.52539	8.60917e-72	9.92554e-70
AC093809.1	0.697116	2.0073	1.52579	9.72774e-18	2.08779e-17
GLIPR1	2.20223	6.34398	1.52642	3.89057e-43	2.57141e-42
MRPS17	5.4999	15.8458	1.52662	5.90142e-39	3.16335e-38
CD14	31.3664	90.4096	1.52726	6.97168e-34	2.93398e-33
LINC01503	1.56872	4.53268	1.53077	4.82137e-46	3.74803e-45
TMEM159	1.6157	4.67215	1.53192	3.29458e-59	7.32493e-58
ITGA7	10.8887	31.5218	1.53352	7.05671e-46	5.44723e-45
SYNC	0.669001	1.9373	1.53397	3.36814e-33	1.37692e-32
FREM2	0.710317	2.0574	1.53429	1.49091e-34	6.4804e-34
ABRACL	3.54444	10.2739	1.53535	7.53126e-68	4.64082e-66
PABPC1L	1.96169	5.69317	1.53713	2.2265e-40	1.27473e-39
RPS3AP5	1.94745	5.66364	1.54014	7.62154e-19	1.71857e-18
ST8SIA4	1.11172	3.23868	1.54261	1.44262e-54	2.06857e-53
CD300LF	0.641398	1.87448	1.5472	8.40614e-45	6.06328e-44
PTGS1	2.77068	8.09731	1.5472	3.38297e-44	2.3719e-43
CPQ	3.73835	10.9381	1.54889	3.38616e-56	5.61583e-55
CHST8	1.59999	4.68333	1.54947	0.0388046	0.0431075
RIN1	1.0215	2.99077	1.54982	3.86462e-40	2.18461e-39
GINS1	1.90911	5.59199	1.55047	4.55279e-50	4.62264e-49
VAMP8	12.5345	36.7477	1.55175	6.33521e-46	4.89558e-45
SAMD9	1.42179	4.16998	1.55233	1.18898e-49	1.17306e-48
TNFRSF1A	12.6861	37.209	1.5524	1.0231e-66	5.39714e-65
RNF135	1.96363	5.76004	1.55256	5.19868e-71	5.23383e-69
PRSS23	1.69324	4.96863	1.55306	7.12764e-44	4.91306e-43
ARHGAP18	1.93281	5.67305	1.55343	7.98096e-56	1.26632e-54
LINC00092	0.966875	2.83848	1.55372	1.10523e-35	5.08212e-35
TRIP6	12.5239	36.8198	1.55579	4.00586e-66	1.95453e-64
NMI	1.70227	5.00948	1.5572	5.09219e-69	3.67667e-67
LATS2	0.966146	2.84416	1.55769	1.00512e-63	3.57444e-62
CEBPD	10.7216	31.5645	1.55778	7.36942e-45	5.33704e-44
CD151	17.8652	52.5986	1.55787	6.95593e-64	2.51116e-62
SEC24D	1.14797	3.38436	1.5598	3.69681e-64	1.3835e-62
PDLIM3	2.52513	7.45198	1.56126	5.50943e-46	4.27594e-45
COL8A2	1.5783	4.66134	1.56237	4.07014e-35	1.81663e-34
AC026403.1	5.28196	15.6154	1.56383	1.5755e-27	5.00742e-27
GGH	3.84361	11.3695	1.56464	1.61181e-60	4.12946e-59
ARNTL2	0.726792	2.15074	1.56522	7.45895e-55	1.09367e-53
FZD2	1.38718	4.10628	1.56568	2.34488e-59	5.32102e-58
CA12	3.50204	10.3702	1.56618	3.09315e-20	7.35525e-20
IGFBP7	112.92	334.395	1.56625	4.51786e-57	8.2487e-56
RMI2	0.98911	2.93888	1.57106	2.88022e-48	2.58804e-47
IFI44	7.26424	21.59	1.57148	1.61144e-57	3.08396e-56
AL450405.1	7.40924	22.0226	1.57159	1.99821e-21	5.02134e-21
SIGLEC9	1.27565	3.79189	1.57169	6.79247e-45	4.92669e-44
PARP12	1.68955	5.02261	1.5718	3.06957e-63	1.0277e-61
ANXA5	67.8808	201.832	1.57208	5.55788e-73	8.10771e-71
IRF1	1.70619	5.07684	1.57315	6.60407e-58	1.29865e-56
C7	1.0096	3.00575	1.57394	0.000352999	0.000443062
MT1H	0.587503	1.74931	1.57412	3.02048e-19	6.92112e-19
MORN3	0.544237	1.62134	1.57488	6.97905e-40	3.89736e-39
HSPB1	59.9474	178.608	1.57503	6.44344e-60	1.54556e-58
AC002456.1	1.35299	4.03375	1.57597	1.717e-53	2.28763e-52
PLVAP	5.44688	16.2519	1.5771	3.5591e-32	1.39095e-31
AL603825.1	1.33779	4.00475	1.58186	2.43112e-26	7.36341e-26
PROM1	1.24967	3.74593	1.58378	1.0069e-20	2.44806e-20
RNU4ATAC	1.13017	3.39637	1.58745	6.84876e-32	2.63979e-31
C4orf47	1.10581	3.32549	1.58846	3.08873e-46	2.43958e-45
TMBIM1	10.7173	32.2439	1.58908	1.49631e-59	3.43359e-58
KIFC1	2.56938	7.73134	1.5893	1.39543e-38	7.34233e-38
AC009902.3	0.697251	2.09898	1.58994	2.93438e-28	9.61053e-28
MCM2	4.86197	14.6418	1.59048	1.04631e-51	1.19953e-50
POC1A	1.68776	5.08302	1.59058	2.46315e-55	3.76612e-54
GPC3	0.865607	2.60801	1.59116	1.30582e-10	2.14476e-10
CXCL1	0.95857	2.88962	1.59193	1.43715e-11	2.44356e-11
RPS2P46	3.54405	10.697	1.59373	9.88047e-35	4.32622e-34
MMP2	8.90154	26.8764	1.59421	7.01458e-48	6.11094e-47
RCAN1	11.251	33.9798	1.59462	4.14888e-50	4.22754e-49
ANXA2R	0.87691	2.64931	1.59512	1.89014e-53	2.51129e-52
IGFBP4	17.5368	52.9894	1.59532	1.70082e-42	1.09035e-41
AC008026.1	0.867538	2.62145	1.59536	2.56403e-26	7.75118e-26
CYP1B1	1.40616	4.25024	1.59579	2.7142e-05	3.5898e-05
ACE	0.750773	2.26968	1.59604	1.41993e-38	7.46571e-38
SQOR	1.6036	4.85165	1.59716	1.14118e-62	3.60937e-61
GADD45A	13.855	41.9731	1.59906	3.27926e-55	4.94519e-54
HLA-DOA	3.85628	11.6908	1.60009	2.01369e-43	1.35154e-42
GBP3	3.30169	10.0112	1.60034	1.44687e-31	5.49678e-31
OAS3	3.46614	10.5112	1.60052	1.13644e-35	5.22061e-35
HRH1	2.62798	7.9815	1.60271	2.44e-46	1.94114e-45
EEF1A1P5	16.6594	50.6166	1.60327	5.21519e-19	1.18306e-18
AL590867.2	7.86532	23.9017	1.60354	4.13096e-25	1.19233e-24
CALU	18.444	56.0595	1.60381	2.2598e-67	1.29224e-65
OSM	0.90437	2.74907	1.60396	5.41501e-22	1.38758e-21
MS4A4A	3.71237	11.2925	1.60495	4.20438e-28	1.3648e-27
CENPF	1.66998	5.09335	1.60878	1.93657e-37	9.66664e-37
WDR78	0.544199	1.65992	1.60891	2.08957e-52	2.5445e-51
NFE2L3	0.971623	2.96987	1.61193	4.10277e-60	9.97504e-59
NIPSNAP2	16.941	51.7896	1.61215	9.6953e-30	3.38719e-29
ACP5	0.991057	3.03066	1.61259	1.83007e-30	6.61844e-30
PCDHB7	1.59541	4.88973	1.61583	4.02356e-30	1.4373e-29
TMEM37	1.10988	3.40187	1.61592	1.70937e-49	1.66806e-48
FAS	1.55405	4.77338	1.61898	6.62414e-45	4.81193e-44
AC007098.1	0.556175	1.70851	1.61913	8.11882e-30	2.85316e-29
RNASE3	0.566308	1.74096	1.62022	1.21175e-25	3.56812e-25
FTH1P7	2.57703	7.92657	1.62099	1.07487e-35	4.94411e-35
MICB	0.567296	1.74561	1.62155	2.68497e-51	2.97784e-50
KDELC2	2.74694	8.45916	1.62269	1.67425e-64	6.52181e-63
SKAP2	3.19457	9.85714	1.62555	1.07732e-40	6.26835e-40
SOD3	2.70956	8.36201	1.62579	1.71781e-46	1.37656e-45
TIFA	0.662811	2.04566	1.62589	7.7601e-56	1.23539e-54
EMP1	11.3063	34.9294	1.62731	5.22143e-48	4.60775e-47
AHR	2.14938	6.6448	1.6283	7.45497e-37	3.61643e-36
CIITA	0.675294	2.09078	1.63045	5.29217e-44	3.67802e-43
SNORD17	0.870443	2.69553	1.63075	7.98012e-12	1.36972e-11
VAMP5	22.8859	70.9758	1.63287	3.46952e-60	8.50777e-59
CAV1	7.61895	23.6543	1.63444	1.71745e-39	9.43605e-39
SP140L	0.622487	1.93365	1.63521	1.33267e-60	3.43275e-59
CD44	17.9774	55.8534	1.63546	3.68818e-48	3.28308e-47
RINL	0.790935	2.45795	1.63582	1.6003e-63	5.60734e-62
DTL	1.10427	3.43186	1.63589	1.91924e-38	1.00283e-37
CD109	0.783668	2.43622	1.63633	1.18821e-35	5.45318e-35
AC090692.1	1.62984	5.06681	1.63635	2.40688e-32	9.46342e-32
CALM2P2	1.05104	3.26925	1.63714	2.51232e-23	6.75497e-23
NPM1P27	2.06612	6.42833	1.63752	5.25608e-25	1.51311e-24
CTSK	4.67616	14.5525	1.63787	6.43266e-36	2.9877e-35
AC021242.3	0.714045	2.22407	1.63911	7.43825e-18	1.60509e-17
RPL10P16	3.43495	10.7043	1.63982	3.20004e-25	9.27382e-25
COL6A1	27.2993	85.0996	1.64029	4.26538e-41	2.53968e-40
RAB7B	1.06484	3.32275	1.64173	1.74771e-33	7.24419e-33
CITED1	4.38346	13.6836	1.64231	1.65405e-27	5.24774e-27
TMEM106C	7.87896	24.6074	1.64301	1.28281e-70	1.16809e-68
NNAT	21.4569	67.0855	1.64456	1.67369e-06	2.33458e-06
RPL23AP42	4.09406	12.8148	1.64621	3.20513e-26	9.64237e-26
SERPINA5	0.845783	2.64777	1.64642	6.55733e-72	7.74741e-70
PSPH	10.2752	32.185	1.64722	7.75979e-39	4.13316e-38
RAD51AP1	1.35577	4.25324	1.64945	1.21293e-54	1.74976e-53
EEF1A1P12	1.50688	4.73806	1.65273	2.54589e-20	6.07716e-20
RHOJ	3.27474	10.3005	1.65326	1.14743e-54	1.65861e-53
CHCHD2	165.965	522.383	1.65423	2.11968e-47	1.7984e-46
SMC4	1.30544	4.11135	1.65508	7.21321e-57	1.29711e-55
BST1	0.534933	1.68548	1.65573	1.32938e-57	2.56129e-56
CDK2	2.84193	8.96023	1.65667	2.63325e-70	2.25419e-68
IQGAP2	1.24264	3.91925	1.65717	1.47353e-56	2.55651e-55
OLFML2A	1.17591	3.7096	1.65749	6.32617e-49	5.95385e-48
CENPM	1.55864	4.91723	1.65756	3.20325e-42	2.02448e-41
FTH1P23	1.4471	4.57088	1.6593	7.52186e-36	3.48453e-35
SLC29A1	8.01915	25.3713	1.66168	1.19933e-40	6.96412e-40
AL590094.1	0.53705	1.6998	1.66224	3.14038e-36	1.47924e-35
GAPDHP1	5.5106	17.443	1.66236	6.53237e-34	2.75721e-33
SCX	1.34898	4.27209	1.66307	1.4026e-14	2.67353e-14
C8orf88	0.967304	3.06452	1.66362	4.30394e-55	6.41597e-54
PDIA5	1.00618	3.18977	1.66456	5.6778e-64	2.07595e-62
AC005000.1	0.725764	2.30147	1.66498	2.66177e-27	8.37611e-27
GPR3	0.865825	2.75362	1.66918	4.86504e-50	4.93267e-49
HLA-DMB	4.98249	15.8582	1.67029	8.4954e-49	7.92757e-48
HLA-DRB5	26.6666	84.8766	1.67034	2.89808e-33	1.18781e-32
TM4SF1	4.22194	13.4399	1.67054	1.49808e-49	1.46689e-48
ANGPT1	0.65769	2.09415	1.67088	1.42007e-26	4.33883e-26
SLC25A24	0.630873	2.00934	1.6713	1.46005e-61	4.18293e-60
AC093673.1	7.82134	24.9242	1.67206	5.88486e-70	4.80743e-68
ADAMTS14	0.556722	1.77413	1.67208	2.32971e-24	6.52539e-24
RPL13P12	11.1127	35.4683	1.67432	1.60136e-24	4.52074e-24
TENT5A	1.58436	5.06105	1.67553	5.94785e-60	1.42908e-58
LAMA2	1.47322	4.71035	1.67686	3.95912e-47	3.29642e-46
AC080038.1	0.661205	2.11438	1.67707	7.19227e-46	5.54588e-45
CDCA7L	2.85948	9.16316	1.68009	4.12938e-49	3.93558e-48
FZD6	1.0836	3.47359	1.68059	1.09262e-45	8.33072e-45
AL161787.1	2.45725	7.87707	1.68061	6.79299e-25	1.94381e-24
FCER1G	21.8339	70.0287	1.68138	4.97719e-51	5.37416e-50
CD274	0.526199	1.68825	1.68185	1.2194e-36	5.85966e-36
CD74	193.017	619.6	1.68261	9.82015e-53	1.22718e-51
PLK1	1.68854	5.42527	1.68392	3.36715e-48	3.01043e-47
AC098614.1	0.721765	2.31904	1.68393	1.34847e-57	2.59457e-56
EEF1B2P3	2.04238	6.56272	1.68405	1.2143e-17	2.59719e-17
RPL23P8	0.565054	1.81917	1.68682	5.55611e-25	1.59851e-24
ANGPTL4	6.65893	21.4577	1.68813	1.27727e-18	2.85802e-18
ST14	1.24776	4.0273	1.69047	1.89764e-39	1.04101e-38
IKBIP	1.49528	4.82711	1.69074	5.85559e-71	5.8133e-69
SNRPGP2	4.92196	15.9124	1.69285	1.58898e-51	1.80001e-50
TRIP13	0.992639	3.21242	1.69432	6.47818e-53	8.21758e-52
AC107075.1	0.642482	2.07959	1.69457	2.26655e-20	5.42666e-20
ARSF	0.911898	2.95324	1.69536	2.25779e-19	5.20183e-19
ICAM1	2.76264	8.95877	1.69726	1.13584e-41	6.97506e-41
THBS4	5.67948	18.4334	1.69849	7.35302e-19	1.65881e-18
SLC10A4	1.54741	5.02445	1.69911	1.65085e-22	4.3059e-22
AFAP1L1	1.59466	5.17917	1.69947	2.2738e-45	1.69834e-44
UBE2T	4.95527	16.1192	1.70175	2.20113e-44	1.55779e-43
BACE2	0.901611	2.93416	1.70237	2.42292e-58	4.99827e-57
PTMAP5	0.901386	2.93343	1.70237	8.7781e-49	8.18068e-48
SLC47A1	0.515042	1.67951	1.70527	4.19851e-40	2.36866e-39
KCNE3	0.781857	2.55532	1.70853	8.51687e-54	1.1541e-52
LRRC61	0.950697	3.10807	1.70896	2.12978e-23	5.74478e-23
EIF1AXP1	0.581387	1.90954	1.71566	7.83918e-32	3.01422e-31
SLC27A3	1.85886	6.1064	1.71591	2.34479e-63	8.00027e-62
RPL13AP7	0.75913	2.49431	1.71622	1.29032e-27	4.11475e-27
FPR3	1.41357	4.64813	1.71731	5.14769e-32	1.99543e-31
CASP6	1.71168	5.63341	1.7186	3.74823e-90	5.35847e-86
HLA-DPB1	24.1626	79.5801	1.71963	2.14711e-52	2.61012e-51
SAMD9L	2.13526	7.04124	1.72142	5.58292e-52	6.53137e-51
UBE2S	4.77604	15.7605	1.72243	9.05492e-56	1.42722e-54
AP000924.1	0.90821	2.99724	1.72254	1.29521e-34	5.6435e-34
CTSC	2.29768	7.5842	1.72282	3.55957e-51	3.88455e-50
ISG15	33.2337	109.939	1.72599	1.71745e-39	9.43605e-39
COL14A1	0.87492	2.89849	1.72808	1.10076e-19	2.56377e-19
GPX7	3.89177	12.9114	1.73014	3.14794e-78	1.80012e-75
SP100	0.923749	3.06721	1.73136	2.8052e-67	1.57886e-65
GSAP	0.76878	2.55298	1.73154	2.43421e-63	8.28557e-62
SBSPON	0.523883	1.74045	1.73215	6.72804e-12	1.15773e-11
GINS2	1.51645	5.04057	1.73289	3.01589e-55	4.57698e-54
HSPB6	9.10274	30.2702	1.73353	1.67927e-50	1.75489e-49
ARL4C	9.34002	31.0603	1.73358	2.05285e-57	3.9026e-56
DCN	4.16682	13.8645	1.73438	3.28892e-22	8.4886e-22
HLA-DQB2	0.998445	3.33102	1.73821	9.30115e-28	2.9787e-27
HIST1H2BK	6.73566	22.4724	1.73826	1.05707e-56	1.86336e-55
GSDMD	2.17223	7.25278	1.73936	1.11941e-61	3.23295e-60
DEPP1	10.1259	33.8291	1.74021	1.54024e-48	1.4034e-47
P3H2	0.998625	3.33711	1.74059	3.93474e-54	5.45068e-53
AC025165.4	0.556436	1.85959	1.74069	4.57763e-07	6.53568e-07
TAGLN	9.3089	31.1281	1.74153	1.30321e-31	4.96553e-31
IFITM3	66.0829	220.992	1.74165	1.6152e-56	2.79214e-55
FPR1	5.70922	19.1083	1.74283	4.52042e-35	2.0107e-34
HSPG2	1.44679	4.84573	1.74386	3.80736e-44	2.65902e-43
FGFRL1	4.58927	15.3724	1.74401	2.02384e-57	3.85257e-56
SIGLEC7	0.568424	1.90462	1.74446	4.70649e-43	3.10207e-42
AC073325.2	0.62036	2.08048	1.74574	4.89454e-27	1.52512e-26
ITPRIPL1	0.687241	2.30505	1.74591	1.63673e-64	6.4106e-63
CFAP77	0.561487	1.885	1.74724	2.62282e-22	6.79395e-22
EPSTI1	0.912749	3.06588	1.74801	1.03492e-49	1.0246e-48
MAOB	26.6857	89.654	1.7483	3.72126e-39	2.01588e-38
HMMR	0.687367	2.31032	1.74894	9.3507e-45	6.731e-44
IFI6	106.61	358.682	1.75037	1.34823e-43	9.15647e-43
AC024293.1	9.65206	32.4977	1.75143	5.05526e-29	1.71094e-28
FST	0.614628	2.07007	1.75189	3.9261e-15	7.64993e-15
RAB36	1.39124	4.69352	1.7543	1.79103e-43	1.20719e-42
CDK1	2.02544	6.8395	1.75566	6.40971e-47	5.28145e-46
TMSB4X	359.744	1214.98	1.75589	7.00943e-80	6.26293e-77
BANF1P3	0.877976	2.96883	1.75764	9.35049e-36	4.31347e-35
PTGFRN	5.68959	19.2431	1.75795	4.80241e-68	3.0112e-66
FRZB	3.36146	11.3796	1.75929	1.29041e-37	6.48881e-37
EVC	0.62111	2.10312	1.75961	1.69017e-45	1.27239e-44
CKS2	12.1927	41.2947	1.75994	1.67691e-51	1.89211e-50
DRAXIN	1.47678	5.0049	1.76089	9.46359e-43	6.14403e-42
SEMA3F	0.75913	2.57738	1.76349	3.12006e-44	2.1951e-43
MFAP4	7.18029	24.4125	1.76551	1.01495e-40	5.91751e-40
AL645929.1	0.865669	2.94487	1.76631	1.80277e-26	5.48933e-26
TMSB10	473.894	1614.39	1.76835	7.69049e-70	6.10796e-68
NAPSB	5.0416	17.1775	1.76857	4.71942e-45	3.46706e-44
NCF1C	0.510772	1.74092	1.7691	9.71313e-55	1.41548e-53
CLEC2B	0.955574	3.2579	1.7695	1.40221e-47	1.20252e-46
THBD	1.02427	3.49407	1.77031	4.09269e-35	1.82613e-34
ACSS3	0.918192	3.13269	1.77054	5.81194e-38	2.96635e-37
B3GNT5	0.69425	2.36966	1.77115	4.97334e-59	1.0888e-57
CPVL	5.73031	19.5842	1.77301	2.06442e-50	2.13862e-49
CASP1	1.81834	6.22459	1.77536	2.67117e-59	6.00425e-58
AMIGO2	0.882288	3.02395	1.77711	5.1891e-35	2.30169e-34
BCL2L12	1.11791	3.83324	1.77776	1.39529e-77	6.04457e-75
C5AR1	2.81932	9.67136	1.77837	7.47998e-36	3.46625e-35
NCAPH	1.2941	4.44041	1.77875	2.08161e-45	1.5605e-44
PSME2P2	0.516393	1.77304	1.77968	4.94396e-51	5.34231e-50
BATF3	0.980929	3.36851	1.77989	2.71925e-46	2.15251e-45
PIPOX	4.29708	14.7603	1.7803	5.66268e-33	2.29136e-32
TMEM158	8.37751	28.7989	1.78142	1.95255e-43	1.31297e-42
CD93	2.87103	9.87253	1.78185	1.18525e-47	1.02136e-46
PIFO	2.36464	8.14139	1.78366	2.01369e-43	1.35154e-42
C9orf64	1.93571	6.66631	1.78402	1.22633e-53	1.65081e-52
C9orf24	1.38539	4.77323	1.78467	7.13626e-08	1.0523e-07
COL12A1	0.559646	1.92914	1.78537	6.77873e-22	1.7302e-21
RAD54L	0.628397	2.16674	1.78578	3.05827e-55	4.63147e-54
SKP1P1	1.23333	4.25332	1.78603	2.4779e-44	1.74933e-43
AC026401.3	2.46724	8.5097	1.78621	1.03427e-71	1.15516e-69
IGFBP5	44.886	154.975	1.78769	5.68716e-46	4.40909e-45
IL2RG	0.541367	1.86934	1.78785	9.68724e-53	1.21162e-51
FBP1	1.66445	5.74845	1.78813	2.05198e-51	2.29899e-50
CP	2.41095	8.33588	1.78973	6.15616e-35	2.72388e-34
HLA-DPA1	16.105	55.7235	1.79077	2.60601e-49	2.51557e-48
MGARP	0.635739	2.19986	1.79091	7.4636e-29	2.51413e-28
FOXM1	2.96152	10.253	1.79163	5.90798e-46	4.5778e-45
RPL10AP6	1.58885	5.50161	1.79187	2.7575e-25	8.00432e-25
FBLN5	2.78523	9.64885	1.79256	3.8923e-49	3.71457e-48
S100A6	138.09	478.684	1.79346	2.31249e-62	7.0943e-61
CFD	2.18924	7.59378	1.79439	3.45392e-31	1.29361e-30
C2	1.06393	3.69588	1.79652	3.48979e-45	2.58766e-44
ARSI	0.669948	2.3291	1.79765	1.93942e-21	4.87618e-21
MTND4LP30	0.614878	2.14155	1.80028	5.09021e-22	1.30599e-21
TP73-AS1	1.38973	4.84699	1.80228	4.19674e-56	6.86459e-55
TFCP2L1	0.612589	2.13668	1.80238	6.26189e-16	1.25748e-15
MT1L	3.45396	12.051	1.80283	6.35014e-40	3.55449e-39
TMEM176A	5.19264	18.1784	1.80769	4.36594e-42	2.73992e-41
PPIAP11	0.614145	2.1505	1.80802	1.46096e-43	9.90794e-43
ARSD	1.45636	5.10439	1.80937	2.93241e-62	8.90058e-61
RAC2	1.76697	6.21422	1.81429	1.64978e-56	2.84846e-55
MT1A	0.776422	2.73204	1.81506	1.06029e-26	3.25975e-26
OIP5	0.819334	2.88526	1.81618	4.14512e-52	4.91365e-51
MTTP	0.578511	2.04058	1.81856	1.46886e-23	3.98459e-23
SEMA3A	0.490595	1.73235	1.82012	3.60445e-20	8.54549e-20
LXN	1.26087	4.45285	1.8203	1.07555e-58	2.29494e-57
RAD51	0.633622	2.23808	1.82057	3.9e-52	4.64233e-51
NUAK2	0.640699	2.26624	1.82258	1.09636e-66	5.74125e-65
BST2	27.1769	96.2095	1.8238	1.41168e-49	1.38514e-48
ENPEP	0.483796	1.71599	1.82657	6.53428e-47	5.381e-46
EIF4HP1	0.704761	2.50102	1.82731	1.4532e-29	5.03392e-29
SUSD2	0.601094	2.13348	1.82755	2.50537e-57	4.71894e-56
NDUFA4L2	6.0528	21.4852	1.82767	1.76978e-38	9.27447e-38
KLHL4	2.06695	7.34958	1.83016	8.33526e-41	4.88965e-40
HLA-DQA2	2.92008	10.3838	1.83026	4.5771e-20	1.0812e-19
UBXN10-AS1	0.544997	1.94268	1.83373	6.67071e-07	9.47204e-07
SKA3	0.878148	3.13499	1.83592	1.29116e-43	8.78556e-43
PDGFRL	0.537184	1.91846	1.83646	7.75771e-35	3.41769e-34
TPX2	4.39735	15.7301	1.83882	7.65028e-49	7.167e-48
MARVELD1	2.13921	7.65344	1.83903	8.20647e-64	2.95516e-62
EVA1C	1.72455	6.18164	1.84177	2.6826e-62	8.15967e-61
RPL13AP5	13.0777	46.9144	1.84293	2.31092e-29	7.94346e-29
TGIF1	1.53566	5.51935	1.84563	2.10661e-81	3.76452e-78
S100A10	32.5648	117.196	1.84753	3.69312e-45	2.73559e-44
NUSAP1	4.75861	17.1582	1.85029	6.28483e-49	5.91884e-48
ECHDC2	0.826535	2.98361	1.85191	1.07679e-49	1.06384e-48
AC107464.1	0.587604	2.12122	1.85198	5.62064e-25	1.61643e-24
LY96	4.62082	16.6835	1.8522	7.42398e-46	5.71838e-45
CHAF1B	0.721888	2.60903	1.85367	2.03438e-61	5.71385e-60
AL162151.2	3.52585	12.7472	1.85414	2.50004e-22	6.48062e-22
ITGA3	2.8558	10.3287	1.85469	1.78517e-41	1.08645e-40
GTSE1	0.948573	3.4314	1.85497	8.28393e-47	6.79055e-46
FBLN1	3.04602	11.0215	1.85532	1.6875e-32	6.68452e-32
GNG12	7.68958	27.8423	1.8563	3.29307e-73	5.15855e-71
MT1M	7.10574	25.792	1.85987	1.41134e-41	8.6298e-41
RPL26P19	2.02406	7.34904	1.8603	3.8177e-25	1.1037e-24
APOC2	0.642624	2.33354	1.86047	7.67044e-52	8.89348e-51
HLA-DRB1	72.0344	261.645	1.86085	1.33411e-52	1.64987e-51
CCR5	0.498025	1.81309	1.86416	3.66876e-49	3.50593e-48
XAF1	0.565385	2.0634	1.86771	1.37914e-32	5.49044e-32
CXCL14	12.5756	45.9615	1.8698	4.31985e-19	9.8276e-19
FAM181A-AS1	0.511024	1.86917	1.87094	6.1413e-45	4.48167e-44
CAV2	1.19263	4.36576	1.87208	7.10613e-48	6.18692e-47
EMILIN1	5.671	20.7647	1.87246	5.52867e-67	3.02827e-65
FAM114A1	1.80579	6.62028	1.87426	2.58147e-76	8.02277e-74
CAVIN1	12.8544	47.1334	1.87449	7.41705e-61	1.96724e-59
MYL12A	9.34236	34.2664	1.87493	8.45212e-75	1.85895e-72
LAMC1	4.95916	18.1971	1.87554	3.13921e-63	1.04856e-61
PLEKHA4	5.93283	21.8119	1.87832	6.28965e-62	1.85779e-60
GRIK1	1.35226	4.98107	1.88108	6.31646e-27	1.95921e-26
NUF2	1.08436	3.9949	1.88131	2.71191e-50	2.79521e-49
RUNX1	0.70098	2.58445	1.88241	7.89569e-54	1.07094e-52
NFKBIZ	0.650497	2.3991	1.88288	2.03914e-48	1.84503e-47
RPL39P3	14.1269	52.1412	1.88398	9.62282e-29	3.22475e-28
FCGR2A	3.23189	11.9511	1.88669	2.99186e-53	3.89896e-52
HCP5	1.69606	6.27276	1.88691	1.1863e-45	9.01616e-45
AC079140.2	0.577537	2.14374	1.89214	5.8846e-31	2.18113e-30
GJC1	0.862934	3.21047	1.89546	5.73966e-73	8.27169e-71
FTH1P16	1.25893	4.68412	1.89558	3.37811e-36	1.58912e-35
MTCO1P2	0.524038	1.9508	1.89633	1.51403e-18	3.3688e-18
OAS2	2.00726	7.47362	1.89658	5.25942e-44	3.65704e-43
NKG7	0.721456	2.69078	1.89904	9.04904e-53	1.13379e-51
TCIM	6.08954	22.7354	1.90054	3.52623e-47	2.95146e-46
[truncated: 600 more rows]
